# Supplementary material for: Age, Gender, and Socio-demographic Disparities in Near Vision Loss: A Global Burden of Disease Study Focusing on Belt and Road Countries
Source: Research Square preprint supplement (doi:10.21203/rs.3.rs-6582843/v1), 2025-06-09
Supplement: Supplementary file 1 [file 24d7f206ef33cb3c205b73ea.xlsx]

## Sheet: Prevalence
	Prevalence in people aged <5 yrs		Prevalence in people aged 5-9 yrs		Prevalence in people aged 10-14 yrs		Prevalence in people aged 15-19 yrs		Prevalence in people aged 20-24 yrs		Prevalence in people aged 25-29 yrs		Prevalence in people aged 30-34 yrs		Prevalence in people aged 35-39 yrs		Prevalence in people aged 40-44 yrs		Prevalence in people aged 45-49 yrs		Prevalence in people aged 50-54 yrs		Prevalence in people aged 55-59 yrs		Prevalence in people aged 60-64 yrs		Prevalence in people aged 65-69 yrs		Prevalence in people aged 70-74 yrs		Prevalence in people aged 75-79 yrs		Prevalence in people aged 80-84 yrs		Prevalence in people aged ≥85 yrs
Gobal/Regions/Countries	Rate	95%UI	Rate	95%UI	Rate	95%UI	Rate	95%UI	Rate	95%UI	Rate	95%UI	Rate	95%UI	Rate	95%UI	Rate	95%UI	Rate	95%UI	Rate	95%UI	Rate	95%UI	Rate	95%UI	Rate	95%UI	Rate	95%UI	Rate	95%UI	Rate	95%UI	Rate	95%UI
Global	307.56	(152.16,548.04)	922.60	(455.35,1642.69)	1525.22	(751.23,2712.83)	2116.54	(1040.48,3761.84)	3121.65	(1822.27,4917.91)	4512.78	(1862.95,8956.42)	7572.79	(3789.99,13931.18)	12279.21	(5090.42,24020.4)	19289.56	(10238.72,30228.09)	29150.67	(13488.33,49621.23)	35842.08	(20139.4,57006.01)	38903.26	(20215.66,60403.42)	38916.52	(19429.86,58385.94)	38630.81	(19265.72,64064.16)	37536.71	(19191.04,64509.84)	37997.03	(18866.87,59668.6)	37474.53	(17761.26,60910)	35085.76	(20066.02,57135.32)
SDI Regions
Low SDI	368.94	(187.04,661.06)	1142.49	(578.38,2046.54)	1889.18	(954.39,3379.19)	2629.30	(1326.54,4697.76)	3885.20	(2298.17,6057.16)	5669.86	(2400.94,11054.2)	9232.31	(4696.08,17027.29)	14989.78	(6465.92,28481.96)	22207.94	(12082.62,34433.42)	30997.08	(15464.21,50088.09)	36775.61	(21011.22,55461.71)	38879.66	(20813.61,61147.5)	41083.81	(21335.29,61918.24)	42943.71	(22089.79,70046.67)	45801.23	(24799.03,75059.84)	49296.56	(24826.65,73278.08)	50807.45	(25115.4,77902.06)	49608.66	(27880.12,75302.93)
Low-middle SDI	286.71	(140.51,508.77)	873.55	(427.37,1548.58)	1446.05	(705.44,2559.35)	2009.00	(977.38,3551.03)	3069.55	(1764.46,4863.39)	4621.08	(1865.88,9321.19)	9350.91	(4646.25,17183.81)	17337.29	(7087.6,33809.05)	26220.45	(14133.67,40447.58)	36429.37	(17815.03,56868.31)	41836.98	(23062.46,62139.45)	42472.21	(22054.24,65799.21)	43437.99	(21732.86,65811.04)	44160.82	(22084.25,71664.66)	46706.29	(24589.99,75398.44)	50797.02	(25509.3,74092.74)	52984.25	(26500.45,79114.37)	53129.08	(31362.26,78140.22)
Middle SDI	328.49	(161.55,584.42)	971.75	(476.72,1728.68)	1628.96	(798.83,2897.27)	2288.48	(1122.15,4071.51)	3463.71	(2033.7,5496.5)	5108.17	(2104.95,10121.25)	8465.22	(4210.07,15583.26)	13695.09	(5617.47,26743.82)	21382.87	(11231.34,33372.97)	32017.64	(14733.31,55181.78)	39871.69	(22458.23,64253.71)	44384.86	(22929.09,67434.28)	45062.57	(22242.12,66945.29)	45494.01	(22783.51,74208.93)	45514.65	(23372.05,75623.7)	46296.33	(23082.04,73076.82)	46271.88	(22122.96,74774.62)	46587.33	(26544.11,73449.5)
High-middle SDI	274.68	(130.97,494.62)	806.94	(384.61,1452.64)	1337.66	(637.51,2408.71)	1865.33	(888.88,3362.92)	2677.40	(1531.89,4186.57)	3807.56	(1582.1,7478.06)	5720.62	(2736.34,10983.14)	8022.39	(3173.02,17521.33)	14486.55	(7448.12,23520.8)	26213.26	(11407.3,49128.63)	35517.02	(20225.18,58984.86)	41371.03	(21106.15,63826.12)	42028.21	(20510.76,62576.48)	40898.85	(20488.55,68039.51)	39169.04	(19802.03,67442.63)	37966.66	(18490.73,62276.8)	38928.98	(18154.49,64304.08)	37811.96	(21497.28,61962.51)
High SDI	167.42	(77.56,300.77)	508.41	(235.54,913.34)	835.99	(386.8,1506.11)	1172.39	(542.22,2114.03)	1628.39	(886.4,2569.97)	2180.57	(920.45,4233.1)	2907.03	(1354.79,5711.54)	3753.40	(1408.08,8418.87)	8091.24	(4072.36,13811.7)	15929.24	(6903.89,30605.91)	20652.01	(11408.6,34850.12)	22125.77	(11248.33,37028.38)	22049.00	(10496.92,36205.25)	20982.64	(10255.73,39319.37)	19846.42	(9380.73,41154.24)	19962.03	(9669.17,34650.12)	20253.83	(8814.5,35733.05)	20683.76	(11307.43,37499.98)
East Asia	315.89	(149.1,568.9)	895.61	(422.69,1611.98)	1502.36	(708.59,2703.32)	2108.77	(994.38,3803.33)	3095.58	(1791.8,4855.26)	4471.41	(1863.67,8710.91)	6486.28	(3090.64,12648.93)	9081.83	(3534.98,20378.86)	17965.78	(9151.87,29808.25)	33309.70	(14193.29,63354.8)	44801.63	(25714.96,75595.49)	52574.69	(27420.22,78039.51)	54400.02	(26856.02,79996.77)	50662.86	(26224.47,81322.22)	46429.91	(22900.03,76665.49)	41939.44	(19987.52,71035.13)	37832.37	(16580.54,67546.86)	35038.50	(17829.24,63255.77)
China	315.79	(149.18,568.84)	893.72	(422.13,1608.85)	1498.87	(707.54,2697.56)	2102.58	(992.17,3788.68)	3106.55	(1796.26,4890.09)	4518.71	(1882.1,8810.2)	6559.77	(3128.41,12792.16)	9230.24	(3601,20709.88)	18255.52	(9304.33,30215.3)	33673.25	(14364.14,63906.77)	45199.75	(25937.17,76166.86)	52937.17	(27644.34,78448.32)	54817.26	(27135.47,80362.69)	50933.72	(26432.85,81547.81)	46588.09	(22955.27,76944.85)	41918.98	(19970.72,70935.92)	37681.26	(16512.6,67322.76)	34819.10	(17712.78,63135.78)
Central Asia	231.75	(108.45,420.53)	717.36	(336.17,1300.34)	1202.00	(563.64,2177.35)	1689.19	(792.37,3063.33)	2213.35	(1232.03,3468.63)	2760.15	(1164.96,5272.8)	3382.17	(1538.53,6540.24)	4080.28	(1553.92,9271.68)	6266.72	(2943.6,10906.87)	9951.17	(3921.08,19761.01)	15106.08	(8395.39,25616.29)	21690.92	(9249.44,39527.3)	27830.48	(13891.24,44977.8)	33602.14	(15188.43,66765.19)	39611.45	(19864.16,74962.86)	46028.49	(21585.53,74735.34)	52070.78	(25375.72,81847.72)	58351.66	(34485.52,83060.77)
Armenia	240.05	(115.84,435.72)	723.92	(349.42,1313.7)	1211.24	(584.8,2196.9)	1701.34	(821.26,3086.85)	2237.31	(1249.28,3532.38)	2806.40	(1174.6,5367.93)	3418.61	(1532.51,6520.94)	4081.88	(1535.63,9005.51)	6289.65	(2965.56,11072.37)	10044.65	(4016.75,19978.74)	15256.90	(8320.48,25714.51)	21881.67	(9280.03,39998.84)	28065.12	(13828.03,45119.21)	33863.63	(15364.64,65266.26)	39984.90	(19725.78,76259.81)	46459.80	(22193.46,76577.83)	52492.11	(25681.46,81641.21)	57813.35	(33132.46,83111.4)
Azerbaijan	239.92	(115.88,440.15)	719.90	(347.74,1320.38)	1205.60	(582.42,2210.72)	1693.64	(818.02,3106.96)	2228.85	(1241.83,3503.14)	2792.28	(1177.49,5402.89)	3417.85	(1552.95,6502.32)	4114.94	(1577.69,9094.24)	6324.84	(2928.9,11204.97)	10058.04	(4088.38,20141.16)	15263.09	(8430.82,26105.4)	21889.57	(9374.62,40088.57)	28032.74	(13927.36,45221.47)	33761.86	(15333.54,65636.09)	39836.75	(19832.43,76332.41)	46301.81	(21988.49,76328.07)	52262.15	(25526.33,81420.2)	58221.48	(33844.21,83085.05)
Georgia	255.69	(123.15,452.51)	767.21	(369.44,1357.7)	1283.27	(617.74,2270.67)	1796.14	(864.18,3177.51)	2362.41	(1325.19,3673.68)	2969.51	(1273.62,5648)	3637.55	(1634.12,7047.03)	4369.04	(1610.26,10179.81)	6727.04	(3192.36,11967.11)	10713.63	(4388.38,21484.95)	16219.86	(9016.53,27749.61)	23191.90	(9712.27,43105.57)	29642.66	(14696.2,48851.47)	35725.88	(16429.67,67747.39)	42079.43	(21235.42,78514.2)	48762.99	(23416.04,76847.87)	54904.06	(27250.51,84994.12)	60774.36	(37041.16,85233.15)
Kazakhstan	216.73	(101.01,381.25)	679.08	(316.53,1194.56)	1138.70	(530.89,2003.19)	1599.85	(746.16,2814.67)	2091.35	(1160.58,3225.37)	2606.81	(1120.82,5047.07)	3187.98	(1476.34,6195.43)	3838.97	(1466.99,8578.87)	5905.62	(2774.9,10339.39)	9401.11	(3600.5,18892.47)	14278.56	(7802.85,24777.44)	20518.68	(8739.76,37476.21)	26310.65	(13110.57,43137.79)	31822.68	(14404.71,65035.58)	37886.29	(19040.87,74501.46)	44646.04	(20665.32,75111.08)	50705.65	(24519.73,81439.98)	56494.14	(31184.2,82761.05)
Kyrgyzstan	237.41	(112.99,417.98)	726.11	(345.58,1278.39)	1217.28	(579.4,2143.4)	1709.27	(813.66,3010.1)	2232.07	(1254.28,3474.39)	2780.71	(1169.46,5229.45)	3425.47	(1597.57,6631.15)	4168.24	(1568.87,9269.79)	6395.43	(3004.92,11397.37)	10114.66	(4059.07,20322.97)	15308.41	(8500.86,26724.02)	21949.23	(9331.84,39891.75)	28197.57	(14004.39,45831.38)	34168.84	(15586.12,68086.67)	40316.99	(20444.2,76252.87)	46468.40	(21832.16,76242.56)	52782.63	(25742.02,83553.76)	59166.94	(34425,83115.88)
Mongolia	237.78	(113.41,422.16)	726.61	(346.61,1290.27)	1218.26	(581.22,2163.79)	1710.22	(816.01,3038.03)	2232.51	(1257.91,3444.45)	2775.04	(1175.96,5218.38)	3416.50	(1595.83,6642.37)	4152.98	(1558.29,9357.09)	6377.22	(2940.12,11278.93)	10092.50	(4059.25,20265.44)	15305.65	(8501.71,26616.38)	21967.70	(9366.76,39918.7)	28261.44	(14176.89,45922.05)	34324.37	(15374.94,68474.8)	40582.26	(20099.26,75945.59)	46608.31	(22120.24,75790.51)	52039.81	(25292.94,83398.07)	58159.58	(31508.28,83465.6)
Tajikistan	233.50	(111.01,429.85)	728.09	(346.16,1340.4)	1220.08	(580.08,2246.15)	1713.03	(814.57,3153.55)	2245.65	(1254.05,3578.85)	2810.45	(1208.09,5335.45)	3454.30	(1568.4,6603.09)	4182.09	(1588.52,9464.62)	6399.26	(3009.67,11064.46)	10100.00	(3910.73,20075.7)	15276.96	(8239.21,25854.31)	21910.49	(9411.15,40156.11)	28153.64	(14023.01,45677.25)	34020.07	(15564.39,67670.32)	39803.83	(20084.75,76735.48)	45149.09	(20779.68,74971.84)	51120.76	(24722.89,81682.99)	57412.19	(33239.35,82027.13)
Turkmenistan	235.61	(111.73,431.27)	727.03	(344.78,1330.76)	1217.21	(577.26,2227.68)	1704.51	(808.44,3118.57)	2232.97	(1245.44,3538.18)	2805.45	(1179.99,5421.91)	3453.12	(1580.46,6583.72)	4164.63	(1608.97,9461.22)	6353.56	(2984.02,11322.41)	10051.20	(3989.36,20248.69)	15236.38	(8355.6,26275.32)	21826.95	(9417.88,39417.41)	28066.52	(14049.53,44961.49)	34070.76	(15461.56,68557.26)	40099.44	(19878.38,76502.08)	46241.27	(21546.63,77575.44)	52084.75	(25271.18,81656.72)	58414.69	(35271.97,81497.12)
Uzbekistan	232.99	(108,418.75)	724.77	(335.98,1302.83)	1215.68	(563.57,2186.28)	1707.81	(791.76,3072.98)	2230.75	(1260.69,3498.27)	2778.47	(1150.19,5433.18)	3407.63	(1548.39,6703.41)	4111.76	(1570.77,9095.58)	6323.67	(3012.02,10993.39)	10052.06	(3997.95,20008.03)	15260.62	(8448.18,26176.2)	21926.13	(9337.52,39548.09)	28130.65	(14280.9,45451.14)	33925.17	(15399.88,67973.05)	39849.36	(19552.91,75223.43)	45980.63	(21545.82,76634.05)	51915.43	(25575.96,82343.81)	58395.51	(33812.21,82876.05)
South Asia	211.73	(99.68,372.65)	652.96	(307.8,1148.36)	1109.42	(523.7,1950.22)	1577.57	(745.86,2773)	2692.03	(1494.5,4520.06)	4439.91	(1710.19,9304.4)	12153.56	(6173.2,22403.26)	26025.67	(11074.14,50823.94)	39158.68	(22147.72,62123.07)	51789.67	(26983.76,74552.27)	57092.54	(32378.48,80483.26)	54879.71	(30124.54,79767.66)	53296.11	(26927.23,76247.72)	52037.34	(26915.89,79957.87)	52974.90	(28730.51,80662.45)	56021.46	(28879.14,80283.17)	57444.92	(28994.97,83195.12)	56456.27	(32752.45,80853.27)
Bangladesh	153.04	(67.86,277.32)	467.07	(207.29,846.5)	789.00	(351.28,1430.5)	1125.19	(504.06,2041.52)	1543.29	(811.22,2559.89)	2008.96	(802.42,4329.86)	4220.66	(1932.41,8598.88)	8173.88	(3266.74,18641.37)	15383.11	(7796.64,25692.22)	25772.43	(10821.11,50266.03)	30703.71	(16159.79,54603.14)	30609.85	(14381.9,52690.44)	30833.37	(14144.25,50755.72)	31401.98	(14975.87,57953.36)	32335.53	(15280.71,62959.17)	33523.36	(15948.73,58684.38)	32805.08	(14474.66,58610.43)	30754.92	(15992.64,55727.3)
Bhutan	185.12	(84.5,344.59)	571.85	(261.25,1064.69)	961.28	(439.67,1789.86)	1344.17	(614.01,2502.58)	1777.80	(961.99,2950.54)	2286.20	(899.04,4715.17)	4921.88	(2265.09,9829.85)	9638.68	(3848.14,20820.65)	17972.06	(9277.75,30225.94)	30023.63	(12554.71,57899.92)	36285.44	(18860.35,62222.3)	36827.08	(17589.58,62133.1)	37713.82	(17343.08,62184.86)	38902.58	(18361.65,69929.39)	40291.46	(19854.2,74147.15)	41930.14	(19532.39,70317.22)	40949.00	(18163.77,70046.96)	38294.62	(20255.89,67975.83)
India	246.85	(117.69,429.71)	751.48	(358.32,1307.95)	1258.96	(600.28,2191.43)	1767.92	(843.33,3077.67)	3061.64	(1700.45,5163.63)	5131.70	(1963.28,10778.47)	14368.75	(7284.57,26640.63)	30786.21	(13076.42,60222.4)	45562.60	(25704.17,73437.74)	58692.80	(30520.76,83679.83)	63737.16	(35760.63,88189.78)	60686.02	(33131.55,88374.02)	58251.59	(29555.09,83348.32)	56394.24	(29011.24,85469.2)	57483.82	(31529.07,86963.95)	61515.68	(31970.02,86911.83)	63223.28	(31964.08,90240.49)	62393.67	(35727.64,87356.08)
Nepal	259.31	(123.18,457.49)	802.73	(381.36,1416.06)	1347.61	(640.27,2376.85)	1902.78	(904.31,3353.99)	2537.15	(1381.56,4140.66)	3242.48	(1331.92,6824.92)	9497.29	(5283.55,15237.31)	21297.20	(11060,34979.62)	40207.05	(27652.32,53528.25)	66285.21	(44751.22,80093.69)	77035.91	(54695.54,92910.8)	72506.41	(49745.5,91547.82)	68300.38	(45967.49,86273.14)	64292.38	(42642.43,85064.28)	57294.07	(37488.84,80154.99)	47335.38	(29553.28,71267.74)	39962.16	(21567.31,69368)	35741.80	(19948.71,63856.01)
Pakistan	103.66	(41.13,201.4)	319.25	(126.6,620.54)	533.41	(211.37,1037.36)	749.78	(297.28,1457.35)	1279.57	(674,2205.51)	2124.74	(817.3,4275.51)	4015.05	(1904.05,8044.46)	6939.16	(2652.42,15352.9)	12180.45	(6078.24,21196.46)	19700.30	(8434.5,39044.73)	24070.93	(12521.06,43010.83)	25584.55	(11770.14,45664.54)	26657.97	(12188.56,45460.22)	27091.36	(12498.52,54501.26)	27787.02	(12919.54,58989.7)	28917.03	(13824.44,51980.34)	28570.50	(12466.46,51120.81)	27951.58	(14658.32,52764.35)
Southeast Asia	269.89	(131.34,479.24)	824.94	(401.3,1465.15)	1389.07	(675.78,2466.84)	1954.62	(950.62,3471.71)	2839.00	(1657.33,4435.31)	3953.70	(1666.96,7679.26)	5296.97	(2519.65,10306.38)	6889.25	(2644.66,15664.82)	11044.06	(5340.93,19195.24)	17431.51	(7069.97,33984.98)	22925.32	(12406.04,39643.84)	27241.27	(12424.42,47282.33)	31205.52	(15523.14,50427.65)	35024.39	(16582.16,60440.81)	39888.02	(21065.82,66454.95)	45202.91	(22393.58,67577.5)	47813.41	(23790.13,72875.15)	46849.83	(27335.72,71839.27)
Cambodia	181.13	(83.15,322.36)	557.89	(256.08,992.99)	934.33	(428.84,1663.21)	1311.95	(602.21,2335.06)	1755.85	(944.51,2813.9)	2258.38	(947.81,4346.7)	2991.76	(1328.35,5850.8)	3960.79	(1454.96,9154.76)	6819.21	(3270.82,12211.21)	11561.38	(4619.8,23092.51)	15307.86	(8290.62,26945.78)	17886.03	(8167.55,32704.28)	21371.84	(10251.38,36080.32)	25543.16	(11257.11,52627.92)	31284.43	(15187.85,63657.19)	38709.17	(18142.86,69139.58)	42816.46	(19541.89,74326.24)	43854.70	(23096.35,73933.28)
Indonesia	303.99	(146.42,546.29)	933.94	(449.98,1679.46)	1562.45	(752.45,2807.8)	2192.10	(1055.72,3938.82)	3252.06	(1902.26,5083.44)	4734.66	(1977.21,9315.77)	6530.00	(3141.65,12806.03)	8637.40	(3333.32,19674.73)	13559.86	(6501.89,23591.47)	21284.42	(8590.66,42180.71)	28471.19	(15310.15,49557.29)	35127.04	(15600.64,62308.18)	40993.87	(19942.56,68081.55)	46101.50	(21650.78,77225.91)	52129.42	(27378.66,85214.19)	59106.37	(29796.24,85239.32)	62751.65	(31692.85,90625.53)	63076.97	(35372.48,88426.85)
Lao People's Democratic Republic	142.15	(60.54,256.21)	442.24	(188.34,797.05)	741.22	(315.68,1335.83)	1040.73	(443.27,1875.4)	1402.09	(736.81,2252.74)	1822.31	(734.6,3658.41)	2419.55	(1093.43,4799.23)	3185.01	(1161.47,6958.11)	5415.68	(2605.94,9624.69)	9104.42	(3625.65,18368.82)	12206.17	(6505.3,20878.18)	14712.16	(6641.45,27671.1)	17560.54	(8415.78,30003.44)	20710.66	(9138.54,43699.97)	25236.43	(11950.31,50771.48)	31294.87	(14189.43,56358.6)	34602.52	(15395.16,60549.9)	35707.70	(19129.61,65919.65)
Malaysia	98.33	(38.18,192.57)	299.27	(116.22,586.04)	501.67	(194.85,982.25)	704.36	(273.62,1378.82)	956.54	(474.5,1620.05)	1259.24	(489.06,2508.82)	1655.17	(709.18,3379.39)	2139.03	(752.13,4872.27)	3645.96	(1765.89,6660.25)	6182.66	(2487.84,12572.13)	8230.81	(4387.97,14468.76)	9769.56	(4443.38,18224.01)	11640.11	(5566.85,19598.01)	13842.08	(6156.27,29374.39)	16974.57	(8091.24,34343.71)	21059.32	(9523.43,38162.37)	23462.85	(10316.15,41459.27)	24770.67	(13432.42,48223.41)
Maldives	183.19	(82.94,335.92)	553.99	(250.77,1016)	927.96	(420.01,1701.93)	1291.57	(583.76,2371.27)	1687.50	(911.86,2684.27)	2179.45	(901.16,4333.45)	2875.04	(1362.11,5499.09)	3741.43	(1365.62,8331.38)	6359.28	(3070.44,11121.89)	10783.48	(4256.97,21592)	14585.92	(7874.16,25365.8)	17601.02	(7952.01,31474.42)	21099.71	(10387.95,35413.67)	25094.06	(11381.12,52794.42)	30626.52	(15001.24,61800.03)	37797.73	(17493.31,67160.72)	41746.68	(19000.93,72262.45)	43039.19	(22955.38,75056.83)
Myanmar	119.75	(50.94,224.48)	369.41	(157.15,692.38)	619.86	(263.7,1161.61)	872.13	(371.01,1633.8)	1174.26	(613.91,1945.17)	1519.43	(607.58,3022.09)	2015.58	(925.64,3879.75)	2663.60	(963.77,5789.46)	4563.08	(2171.03,8039.49)	7722.89	(3080.05,15337.47)	10273.88	(5433.35,17918.27)	12191.85	(5464.41,22454.45)	14466.38	(6871.4,24403.35)	17105.97	(7557.35,36053.74)	20943.09	(10005.05,41580.54)	26068.66	(11970.24,47726.84)	29042.35	(12772.71,50656.74)	30658.02	(16373.2,56832.39)
Philippines	474.68	(247.06,845.85)	1461.13	(760.48,2602.46)	2449.79	(1275.03,4362.54)	3439.82	(1790.11,6125.96)	5113.91	(3056.06,8026.92)	7462.32	(3141.12,14309.13)	10258.56	(5088.08,19919.91)	13492.95	(5180.09,30085.71)	21094.15	(10418.42,34874.66)	33065.90	(13636.08,63848.61)	43211.83	(23571.9,74351.93)	51497.89	(25037.45,79318.64)	57144.89	(29241.46,85341.44)	60189.21	(31117.88,87742.49)	63523.79	(36116.42,90315.09)	67196.33	(37105.58,89848.72)	69061.68	(37654.51,93009.39)	68772.58	(41361.19,90397.09)
Sri Lanka	207.67	(97.71,376.14)	632.90	(297.81,1146.28)	1061.46	(499.52,1922.48)	1491.97	(702.23,2702.19)	1966.69	(1067.2,3201.11)	2479.27	(1042.94,4824.54)	3294.40	(1500.18,6393.48)	4411.90	(1636.64,10004.51)	7600.66	(3729.67,13394.6)	12884.44	(5241.79,25644.12)	17142.18	(9194.18,29997.68)	20371.72	(9110.46,37466.41)	24203.96	(11477.82,39806.56)	28673.52	(12581.7,59759.74)	34845.49	(16931.09,69543.57)	42811.81	(20298.02,72794.36)	47249.36	(22380.93,76850.85)	48576.63	(26663.24,77769.49)
Thailand	182.61	(83.75,325.25)	553.20	(253.7,985.35)	927.98	(425.65,1652.4)	1306.49	(599.61,2324.41)	1741.34	(938.04,2812.24)	2227.12	(923.96,4370.87)	2948.88	(1330.77,5779.24)	3907.95	(1422.47,8908.33)	6687.51	(3247.28,11862.49)	11312.14	(4641.35,22729.67)	15053.98	(7953.76,26073.75)	17883.67	(7936.88,33044.95)	21267.87	(10181.29,35374.81)	25205.66	(11523.6,53227.01)	30795.76	(15181.22,62563.19)	38140.38	(17592.71,67929.93)	42165.76	(19158.02,73495.91)	43540.44	(24482.97,72917.46)
Viet Nam	121.99	(51.09,224.42)	369.56	(154.82,680.08)	620.42	(259.84,1141.29)	872.63	(365.33,1604.44)	1173.49	(599.18,1960.23)	1519.57	(607.33,3043.8)	2014.79	(901.57,4017.8)	2660.18	(959.96,5906.88)	4537.20	(2148.42,8045.67)	7641.23	(3007.48,15327.33)	10173.83	(5326.22,17813.51)	12130.64	(5422.11,23005.89)	14463.48	(6881.35,25300.33)	17214.21	(7583.66,36971.55)	21217.25	(10240.88,44254.04)	26748.36	(12212.69,49053.14)	30090.15	(13583.5,52184.78)	31544.36	(16782.01,57677.37)
High-income Asia pacific	148.60	(64.73,278.03)	446.01	(194.71,835.73)	746.81	(326.03,1399.67)	1046.54	(456.46,1961.66)	1641.74	(900.51,2708.84)	2503.04	(1018.35,4869.29)	3571.23	(1670.8,7070.85)	4843.99	(1813.26,10961.44)	8658.73	(4280.16,14992.35)	15034.28	(6162.77,29448.07)	18787.03	(9916.23,33332.81)	19908.45	(9472.66,35772.17)	19885.74	(8964.68,35006.69)	18924.69	(8939.82,38143.15)	18861.78	(8548.16,41413.91)	19501.36	(9350.82,35300.31)	19306.72	(8377.68,35189)	20180.06	(10771.33,37527.68)
Brunei Darussalam	150.07	(63.7,274.16)	461.58	(195.9,843.06)	770.70	(327.23,1409.06)	1078.19	(457.94,1972.91)	1558.36	(865.34,2567.15)	2216.85	(915.19,4334.07)	3024.06	(1389.89,5985.04)	3981.69	(1444.32,8991.21)	7861.30	(3977.43,13450.55)	14677.59	(6288.55,28673.59)	18267.30	(9582.1,32341.49)	18538.81	(8660.55,33389.18)	18227.98	(8154.39,32517.11)	17282.43	(8251.4,34474.97)	17020.17	(7865.07,36231.71)	17325.80	(8182.02,30256.32)	16862.64	(7318.49,30283.4)	16408.51	(7831.88,32127.17)
Singapore	152.61	(64.44,282.56)	466.21	(197.12,862.8)	784.96	(332.67,1451.46)	1082.00	(454.82,2007.05)	1582.32	(880.71,2632.55)	2266.29	(903.31,4368.34)	3057.52	(1370.23,6061.98)	4030.46	(1464.97,9127.13)	7934.53	(3999.93,13689.73)	14709.39	(6165.48,29268.55)	18242.31	(9721.95,33059.35)	18571.88	(8737.86,33529.91)	18176.93	(7927.28,32220.01)	17215.07	(8215.74,35267.29)	16963.84	(7668.28,37381.37)	17616.25	(8267.92,32113.1)	17202.90	(7492.93,30852.27)	16821.24	(8816.28,32593.46)
North Africa and Middle East	337.57	(164.66,605.15)	1025.09	(499.97,1838.34)	1717.42	(837.44,3083.38)	2415.06	(1177.51,4339.49)	3118.62	(1779.93,4890.99)	3799.10	(1625.28,7402.87)	4809.20	(2240.79,9282.83)	6156.76	(2325.4,14058.06)	10313.77	(5000.33,18023.18)	17249.62	(6969.6,33818.97)	23052.15	(12424.62,40317.14)	28006.37	(12753.22,49803.15)	31458.44	(15089.38,52415.19)	33805.85	(15770.45,64087.17)	38040.83	(18745,72135.3)	44073.71	(20589.16,72280.57)	48937.51	(23950.87,79073.78)	53056.15	(30712.89,77475.37)
Afghanistan	317.25	(154.41,565.22)	998.25	(485.84,1778.4)	1672.71	(814.09,2979.99)	2348.06	(1142.68,4182.91)	2984.10	(1684.43,4726.58)	3570.55	(1542.65,6891.39)	4551.79	(2077.09,9067.08)	5921.65	(2250.14,13579.66)	10012.58	(4757.55,17623.2)	16809.40	(6824.86,33552.61)	22635.38	(11938.91,40280.09)	27502.82	(12507.09,50760.09)	30875.05	(14989.38,52283.01)	33000.95	(15470.61,65810.35)	36626.41	(17419.9,71596.54)	41767.15	(19096.95,71808.83)	46766.63	(22757.32,77171.72)	51819.92	(27536.35,80172.44)
Bahrain	325.71	(157.41,581.25)	984.83	(475.95,1757.52)	1647.85	(796.57,2940.66)	2294.29	(1110.46,4093.69)	2876.95	(1626.49,4525.98)	3378.85	(1486.43,6512.8)	4169.50	(1956.09,7936.76)	5366.75	(2010.54,11903.74)	9188.76	(4448.24,16264.36)	15253.67	(6102.94,30200.48)	21020.89	(11240.23,36641.5)	25585.40	(11464.86,47537.66)	28815.87	(13349.6,48991.36)	31098.32	(14567.05,62019.89)	35030.63	(17029,66822.48)	41796.12	(19578.45,70090.59)	47234.45	(22809.3,78533.67)	52376.46	(28025.83,78687.5)
Egypt	372.74	(183,660.97)	1142.65	(561.1,2026.29)	1913.89	(940.02,3394.04)	2685.69	(1319.07,4762.69)	3429.67	(1942.04,5380.67)	4144.86	(1812.3,8175.39)	5254.47	(2403.96,10381.87)	6758.58	(2611.68,15535.91)	11417.21	(5551.97,20179.94)	19209.35	(7721.27,37584.71)	25535.27	(13589.53,45079.74)	30374.99	(13671.98,55019.85)	33893.25	(16373.75,57104.87)	36160.60	(16744.2,69438.56)	40573.60	(20551.33,78143.57)	46970.94	(22698.7,76987.07)	51933.36	(25276.78,84163.56)	55026.55	(31531.2,82085.42)
Iran (Islamic Republic of)	238.17	(113.4,428.83)	699.51	(333.13,1259.9)	1172.67	(558.62,2112.68)	1645.20	(783.58,2962.34)	2380.76	(1324.58,3817.99)	3372.34	(1409.15,6537.04)	4505.58	(2129.97,8646.82)	5764.49	(2168.95,13182.71)	8829.07	(4201.39,15933.18)	13647.62	(5522.4,26983.59)	18228.98	(9675.73,32003.81)	22578.46	(10132.21,41013.38)	25746.00	(12228.8,43178.33)	27726.28	(12743.28,56601.54)	31678.19	(15247.13,63867.66)	37047.99	(17253.56,63726.53)	40715.32	(18973.88,69513.34)	44089.56	(24272.65,74417.72)
Iraq	325.21	(158.01,584.68)	989.05	(480.56,1778.19)	1657.31	(805.25,2979.65)	2325.14	(1129.72,4180.17)	2957.25	(1689.27,4714.43)	3543.30	(1542.55,6693.08)	4513.93	(2097.68,8787.01)	5819.29	(2168.1,13103.35)	9828.42	(4773.41,17535.71)	16482.94	(6800.67,32308.42)	22028.33	(11990.31,38574.46)	26448.91	(11940.72,48730.37)	29738.75	(14159.84,50613.73)	32001.87	(15122.33,63996.64)	36010.38	(17704.97,69447.85)	41752.93	(19309,72905.45)	47156.58	(23002.73,78007.46)	52888.29	(30087.63,79265.61)
Jordan	323.87	(152.76,581.59)	985.72	(464.95,1770.06)	1651.37	(778.92,2965.43)	2314.02	(1091.45,4156.07)	2935.66	(1659.65,4687.02)	3508.81	(1506.85,6750.18)	4422.62	(2057.32,8568.65)	5698.65	(2098.3,12953.56)	9674.03	(4702.42,17009.87)	16332.24	(6526.07,31717.27)	21804.27	(11748.08,38097.97)	26092.79	(11978.18,48133.5)	29326.80	(13776.78,49646.76)	31652.21	(14588.63,61630.79)	35679.80	(16983.96,69558.81)	41405.92	(18970.03,71687.91)	46432.51	(21902.54,76012.35)	51370.72	(29055.9,77670.4)
Kuwait	324.67	(156.93,581.45)	980.25	(473.82,1755.58)	1642.86	(794.08,2942.2)	2304.42	(1113.91,4127.19)	2935.83	(1646.87,4647.86)	3527.50	(1524.2,6916.05)	4513.57	(2097.19,8800.34)	5779.18	(2185.49,12555.29)	9598.34	(4654.03,17012.4)	16205.83	(6586.9,32216.74)	21482.20	(11595.19,38068.61)	25724.72	(11471.4,47101.81)	28705.91	(13570.88,48929.95)	30570.31	(14001.31,61415.84)	34436.72	(16781.28,67701.82)	40216.90	(18635.03,68822.33)	45040.96	(21405.72,75305.45)	51025.70	(29409.82,77413.28)
Lebanon	285.69	(134.42,526.8)	874.29	(411.37,1612.18)	1464.98	(689.26,2701.48)	2055.71	(967.2,3790.82)	2614.93	(1472.76,4155.66)	3141.26	(1314.74,6152)	3983.87	(1791.52,7733.98)	5148.97	(1966.36,11736.76)	8745.42	(4229.9,15487.43)	14736.99	(5806.02,29145.75)	19660.61	(10458.33,34974.94)	23528.34	(10599.95,43522.56)	26495.98	(12464.16,45702.25)	28606.01	(13026.95,59845.53)	32161.99	(15825.85,67159.67)	37371.85	(17711.1,67210.23)	42193.16	(19508.88,71773.71)	47565.86	(27373.02,75648.02)
Oman	325.25	(155.34,578.05)	983.69	(469.8,1748.26)	1648.54	(787.39,2929.84)	2313.36	(1104.97,4111.4)	2896.98	(1650.2,4588.9)	3343.65	(1457.72,6483.04)	4167.08	(1895.29,7990.55)	5352.37	(1985.15,12017.04)	9202.14	(4437.19,16172.31)	15552.02	(6183.35,31562.15)	20845.13	(11121.71,36856.7)	25449.00	(11455.88,47160.08)	28946.53	(13580.04,49372.48)	31680.59	(14793.31,64105.21)	35940.00	(17677.74,68921.64)	41682.59	(19424.27,70253.39)	46780.29	(22330.65,78086.92)	53177.85	(30115.88,80805.2)
Palestine	323.17	(157.46,582.96)	986.88	(480.83,1780.16)	1653.80	(805.77,2983.06)	2320.84	(1130.77,4186.02)	2954.27	(1682.63,4707.15)	3551.10	(1534.95,6984.37)	4529.72	(2056.54,9016.94)	5894.71	(2222.24,13438.2)	9968.96	(4782.25,17681.63)	16739.34	(6850.67,33207.47)	22106.79	(11757.99,39216.99)	26167.92	(11522.95,47575.21)	29437.86	(13782.28,49448.99)	31836.93	(14958.81,63233.72)	36017.85	(18021.92,70943.54)	42297.99	(19737.01,72716.52)	48254.76	(23297.26,80133.43)	53860.07	(29945.05,80067.86)
Qatar	313.65	(151.58,561.65)	981.13	(474.2,1756.99)	1642.94	(794.11,2942.34)	2306.77	(1114.92,4130.94)	2778.34	(1559.41,4411.97)	3257.31	(1414.5,6414.27)	4062.19	(1892.12,7995.02)	5098.73	(1948.25,11173.05)	8749.35	(4277.95,15441.56)	14822.46	(6047.11,29550.21)	20043.52	(10822.9,35299.32)	24646.99	(10973.65,45274.06)	27958.11	(13161.11,47689.89)	30308.56	(13842.64,60973.33)	34570.76	(16874.37,67901.96)	40497.43	(18750.84,69045.65)	45539.02	(21712.93,75582.68)	51808.55	(27781.51,79346.77)
Saudi Arabia	322.37	(153.48,586.03)	977.59	(465.48,1777.29)	1634.69	(778.55,2970.48)	2285.45	(1088.95,4149.45)	2897.81	(1633.33,4654.96)	3462.40	(1504.61,6644.65)	4336.88	(2008.39,8567.19)	5517.17	(2054.87,12197.55)	9313.91	(4551.64,16400.02)	15832.45	(6244.53,31499.3)	21303.15	(11430.29,37547.48)	25548.97	(11659.77,46577.15)	28715.74	(13246.04,48022.37)	30577.08	(14092.92,61342.76)	34167.04	(16567.09,67242.11)	39615.79	(18212.62,68626.09)	45242.13	(21506.55,75914.86)	51861.72	(29356.65,79058.09)
Syrian Arab Republic	254.18	(122.67,474.13)	776.83	(374.94,1448.87)	1302.08	(628.49,2428.34)	1829.39	(883.2,3410.83)	2368.24	(1317.7,3799.37)	2927.08	(1253.58,5755.24)	3749.07	(1705.86,7499.46)	4753.43	(1796.93,10779.81)	7911.19	(3803.62,13953.1)	13274.18	(5542.24,26312.76)	17622.06	(9330.19,31071.63)	20991.98	(9538.42,39341.13)	23595.87	(11279.85,40947.67)	25422.75	(11914.68,52841.38)	28817.34	(13831.15,59997.93)	33580.76	(15190.44,61148.76)	37968.51	(17314.88,63952.49)	41924.72	(21064.12,74004.62)
Türkiye	406.61	(199.58,714.3)	1217.07	(597.39,2138.09)	2039.39	(1001,3582.68)	2861.62	(1404.59,5027.15)	3634.58	(2103.15,5820.31)	4357.41	(1852.44,8433.24)	5513.96	(2553.73,10617.6)	7101.92	(2740.18,16443.25)	12086.61	(5850.39,20978.4)	20473.58	(8414.26,40187.81)	27115.00	(14681.36,47610.31)	32166.32	(14711.24,57985.98)	35935.68	(17237.73,60671.62)	38563.87	(18223.34,71775.52)	43261.88	(21197.42,78576.48)	49880.36	(23224.96,78509.06)	55524.18	(26986.87,87002.41)	59939.94	(35633.21,84162.75)
United Arab Emirates	318.94	(157.94,575.4)	945.08	(468,1705.03)	1583.22	(784,2856.35)	2219.56	(1099.02,4004.68)	2844.28	(1604.83,4493.11)	3405.16	(1471.32,6585.75)	3647.66	(1643.4,7280.69)	4795.50	(1812.29,10516.7)	8297.31	(4020.87,14751.64)	13521.14	(5316.34,26569.4)	18485.12	(9925.55,32294.33)	22644.26	(10175.65,40547.95)	25958.27	(12212.99,43817.39)	27257.45	(12481.35,55683.34)	30624.79	(14935.8,61257.98)	34668.10	(16198.88,61063.03)	38593.35	(17804.27,65238.53)	43475.92	(22695.47,74186.65)
Yemen	321.80	(154.54,579.82)	993.46	(477.08,1789.99)	1664.47	(799.34,2999.05)	2337.39	(1122.34,4211.28)	2984.49	(1706.03,4831.18)	3601.79	(1550.93,7108.91)	4590.21	(2158.53,9026.64)	5936.33	(2218.9,13575.86)	9970.43	(4821.8,17545.63)	16716.19	(6759.19,32731.97)	22357.21	(11969.49,39508.73)	26818.16	(12062.55,47979.91)	30027.96	(14219.08,52327.35)	32086.86	(14534.15,63923.04)	35858.82	(17594.03,69557.24)	41876.59	(19545.54,71774.31)	47188.10	(22612.21,78186.09)	52687.35	(29203.15,79714.65)
Central Europe	151.47	(68.47,281.05)	459.49	(207.84,852.87)	769.72	(348.01,1429.96)	1084.24	(490.72,2015.03)	1459.98	(803.21,2369.1)	1893.39	(775.71,3693.29)	2658.66	(1225.79,5260.22)	3770.46	(1392.25,8511.13)	5813.66	(2798.1,10271.22)	8841.16	(3585.68,17640.39)	12022.81	(6457.72,20755.96)	15364.40	(6790.98,27915.63)	18422.07	(8830.65,30667.26)	21039.19	(9417.1,44308.62)	23956.95	(11501.2,50020)	26626.45	(12217.87,49280.88)	32809.33	(15285.24,55816.03)	44077.46	(24409.35,73016.96)
Albania	156.15	(70.01,292.87)	475.49	(212.94,892.3)	794.75	(355.55,1492.35)	1116.50	(499.73,2095.83)	1436.14	(772.02,2355.19)	1756.80	(721.64,3595.49)	2478.26	(1114.04,5018.41)	3566.71	(1290.96,7862.71)	5652.47	(2756.35,9845.61)	8808.04	(3601.05,17974.06)	11909.85	(6356,21000.02)	14937.27	(6620.06,27719.74)	17805.04	(8627.73,29700.09)	20532.48	(9302.36,41949.63)	23219.37	(10929.4,48403.71)	25816.80	(11816.22,48069.29)	31783.32	(14797.64,54136.64)	43617.11	(24084.61,73225.23)
Bosnia and Herzegovina	310.73	(158.18,559.26)	934.60	(475.83,1682.11)	1567.01	(797.9,2820.21)	2202.43	(1121.73,3963.57)	2810.19	(1607.32,4392.46)	3381.00	(1465.95,6616.8)	4747.20	(2190.47,9325.06)	6916.14	(2672.54,15467.77)	11114.04	(5545.55,19425.52)	17363.74	(7016.63,34173.91)	23405.34	(12773.71,40909.86)	29259.40	(12638.4,52549.55)	34537.70	(17000.82,58339.44)	39260.66	(18318.74,70496.89)	44031.80	(21943.69,77463.45)	48567.37	(22216.15,78870.87)	55814.32	(28690.88,89186)	67140.69	(41089.64,88916.14)
Bulgaria	156.88	(68.26,294.41)	477.89	(207.94,896.91)	800.70	(348.38,1502.8)	1122.31	(488.17,2106.88)	1440.16	(787.62,2373.55)	1750.50	(714.18,3500.02)	2445.98	(1123.77,4894.75)	3528.73	(1284.44,7856.34)	5634.51	(2705.59,9941.99)	8763.68	(3581.67,17391.34)	11852.69	(6335.32,20412.37)	14922.34	(6534.83,26757.56)	17847.05	(8426.53,30012.42)	20654.38	(9195.37,44022.51)	23394.40	(11220.22,48153.87)	25824.98	(11492.77,48012.24)	31850.38	(14707.26,54925.59)	43443.14	(22557.12,73418.84)
Croatia	144.31	(63.85,269.09)	440.51	(194.88,821.38)	738.07	(326.52,1376.2)	1036.70	(458.72,1933.12)	1297.49	(698.24,2115.21)	1514.39	(635.88,3009.7)	2067.33	(919.49,4186.46)	2954.97	(1052.35,6634.42)	4773.57	(2273.34,8428.28)	7527.69	(3095.55,14835.82)	10303.79	(5425.99,18145.06)	13102.74	(5858.15,23773.69)	15714.80	(7566.68,26621.51)	18110.39	(8142.3,37439.45)	20469.01	(9621.22,41734.94)	22419.60	(10201.35,41004.5)	28003.95	(12743.66,47224.17)	39995.13	(21623.19,68338.26)
Czechia	135.50	(60.27,251.82)	411.79	(183.13,765.29)	690.02	(306.87,1282.38)	966.99	(429.82,1797.63)	1237.07	(662.61,2020.87)	1496.06	(601.05,3022.84)	2085.16	(905.64,4393.58)	3005.50	(1082.57,6777.52)	4774.97	(2283.45,8324.93)	7393.05	(3016.47,14734.13)	9979.76	(5375.04,17551.98)	12548.09	(5577.58,23146.2)	15042.57	(7177.93,25229.29)	17497.60	(8037.59,35910.58)	19848.35	(9522.49,41066.97)	21975.63	(9867.95,39790.49)	27346.08	(12436.41,46401.74)	39490.42	(21546.22,67371.27)
Hungary	122.96	(51.83,229.43)	376.40	(158.64,702.32)	630.64	(265.79,1176.69)	884.40	(372.7,1650.22)	1137.25	(599.77,1857.24)	1388.14	(571.69,2765.99)	1935.00	(845.39,3921.9)	2776.34	(973.63,6360.21)	4411.46	(2045.56,7782.1)	6833.51	(2746.28,13524.74)	9272.88	(4920.26,15862.38)	11756.74	(5180.26,21364.29)	14143.15	(6668.02,23555.84)	16397.23	(7285.97,34193.46)	18573.32	(8929.1,38607.69)	20567.66	(9436.93,37656.82)	25573.99	(11653.68,43055.85)	36698.24	(19743.41,65696.41)
Montenegro	154.50	(69.65,292.45)	472.21	(212.84,893.84)	789.88	(355.81,1494.98)	1110.06	(500.29,2101.18)	1431.03	(787.14,2335.61)	1746.90	(716.5,3535.8)	2436.86	(1105.93,4936.77)	3500.18	(1273.02,7899.61)	5617.32	(2726.04,9930.83)	8801.84	(3559.88,17440.93)	11871.33	(6218.49,21060.74)	14849.30	(6479.01,26566.13)	17698.86	(8343.16,29694.95)	20445.63	(9208.16,42692.71)	23278.77	(11030.12,48747.32)	25794.26	(11636.94,47530.8)	31801.41	(14661.51,53474.48)	43233.52	(22432.71,72911.19)
North Macedonia	157.69	(68.69,296.35)	476.57	(207.59,895.58)	798.76	(347.95,1500.99)	1120.91	(488.3,2106.33)	1437.34	(788.53,2374.15)	1753.05	(712.87,3516.35)	2449.76	(1130.22,4909.16)	3526.16	(1270.77,7921.32)	5635.09	(2710.33,9892.84)	8771.89	(3544.29,17655.65)	11844.47	(6353.29,20502.84)	14842.68	(6528.33,26621)	17701.88	(8436.96,29544.63)	20443.45	(9063.68,42297.94)	23222.84	(10917.66,47480.8)	25801.67	(11617.12,48020.67)	31760.61	(14658.06,53393.27)	42333.30	(20304.79,72847.76)
Poland	149.68	(66.61,276.41)	448.97	(199.81,829.09)	752.77	(335.09,1390.16)	1056.35	(470.26,1951.22)	1549.40	(838.43,2530.8)	2227.61	(908.83,4455.75)	3148.06	(1473.47,6125.31)	4307.56	(1598.37,9818.38)	6474.18	(3149.17,11458.83)	9644.08	(3934.2,19231.18)	13087.95	(6990.82,22859.95)	16820.13	(7481.75,30818.51)	20118.00	(9592.73,33173.63)	22971.10	(10213.7,49108.4)	26765.49	(12639.71,54814.48)	31405.51	(14623.4,57799.24)	37140.13	(17196.03,64086.73)	46809.33	(25186.77,76477.92)
Romania	157.36	(68.49,295.28)	478.06	(208.03,897.17)	801.11	(348.61,1503.42)	1123.63	(488.9,2108.89)	1440.85	(787.87,2374.32)	1750.60	(714.65,3499.35)	2445.68	(1123.56,4893.99)	3522.72	(1282.54,7847.15)	5631.87	(2704.23,9941.2)	8762.77	(3581.38,17389.48)	11848.53	(6332.53,20408.42)	14919.62	(6533.87,26752.69)	17873.70	(8439.6,30060.9)	20661.36	(9198.39,44038.33)	23361.33	(11202.65,48104.6)	25820.17	(11489.55,47989.69)	31847.38	(14705.07,54922.71)	44106.02	(24394.34,73212.92)
Serbia	157.81	(71.06,300.22)	468.59	(210.38,891.23)	778.25	(348.38,1479.76)	1105.84	(497.07,2103.43)	1433.63	(779.63,2347.22)	1757.65	(715.88,3548.91)	2459.10	(1132,4965.55)	3522.04	(1271.61,7978.14)	5625.96	(2701.84,9801.25)	8797.75	(3584.08,17438.48)	11902.54	(6299.05,20843.35)	14931.40	(6679.29,27268.2)	17810.44	(8436.18,29928.69)	20568.29	(9168.87,42480.57)	23231.54	(11074.04,48790.32)	25675.93	(11696.76,47566.83)	31643.39	(14918.39,53960.7)	44640.97	(24832.67,73427.58)
Slovakia	113.87	(47.81,209.46)	348.74	(146.41,641.5)	584.25	(245.28,1074.76)	819.52	(344.06,1507.64)	1071.36	(561.72,1768.03)	1336.24	(548.47,2677.65)	1870.95	(828.01,3764.24)	2679.08	(949.09,6051.8)	4234.09	(2000.52,7614.41)	6532.05	(2575.01,13194.64)	8808.48	(4616.1,15551.4)	11064.57	(4879.39,20128.22)	13178.73	(6310.49,22019.4)	15169.12	(6941.75,31417.6)	17132.62	(8078.08,35389)	18917.23	(8453.17,35147.82)	23571.40	(10623.59,40262.13)	34266.47	(18290.39,61791.96)
Slovenia	176.23	(82.29,335.04)	535.39	(250,1017.86)	897.36	(419.03,1705.95)	1258.59	(587.67,2392.81)	1685.94	(926.74,2656.33)	2177.83	(893.76,4303.21)	3117.73	(1451.6,5919.74)	4501.00	(1681.44,9890.43)	7072.27	(3428.66,12484.84)	10814.46	(4379.05,21343.69)	14462.57	(7716.4,24961.48)	18045.88	(8153.13,32854.69)	21500.96	(10332.56,35396.91)	24808.43	(10929.08,50621.36)	28148.52	(13607.95,56995.71)	31255.96	(13860.78,57126.83)	37261.71	(17582.14,62611.13)	48844.09	(27216.93,75658.4)
Eastern Europe	293.71	(138.38,534.96)	868.54	(409.41,1581.19)	1440.10	(678.99,2619.19)	2022.88	(953.52,3679.87)	2957.26	(1721.45,4598.97)	4223.23	(1791.05,8157.96)	5911.88	(2864.04,11531.43)	7849.97	(2992.12,17586.84)	14950.70	(7365.82,24937.28)	27054.36	(11508.32,51628.82)	35578.05	(20124.14,60431.21)	41492.86	(20908.83,66160.48)	43189.13	(20903.31,66408.35)	40689.32	(19840.83,70957.92)	43535.81	(21647.86,77391.33)	50153.41	(24307.89,74641.51)	56097.81	(28078.04,83233.77)	58692.90	(34635.19,84315.97)
Belarus	236.17	(108.97,425.39)	703.42	(324.55,1267.02)	1178.70	(543.84,2123.13)	1653.98	(763.11,2979.04)	2200.03	(1237.82,3453.07)	2814.21	(1182.6,5394.19)	3539.66	(1635.47,6802.58)	4367.49	(1665.1,9821)	7147.14	(3381.33,12792.74)	11856.49	(4621.5,23938.57)	16812.78	(9118.29,29600.78)	22077.34	(9809.02,40585.1)	25267.67	(11654.56,42827.77)	26314.99	(11771.79,55834.22)	30655.99	(14239.07,65649.91)	38261.89	(17603.08,69432.65)	43673.97	(20332.38,74582.46)	48556.94	(26865.71,79313.73)
Estonia	161.77	(74.16,295.89)	489.99	(224.61,896.37)	821.07	(376.38,1501.91)	1152.11	(528.14,2107.87)	1562.98	(843.94,2553.53)	2050.01	(838.91,3868.11)	2588.11	(1178.6,5087.27)	3177.76	(1168.16,7116.64)	5200.00	(2479.6,9335.21)	8646.31	(3452.31,17599.5)	12253.68	(6528.79,21586.05)	16077.44	(7449.63,28925.44)	18379.77	(8708.02,30834.27)	19099.08	(8621.43,41275.03)	22136.43	(10202.61,47527.32)	27416.37	(12524.21,49882.37)	31687.85	(14225.8,55040.9)	36896.97	(19964.96,66981.36)
Latvia	273.34	(129.47,492.21)	817.49	(387.21,1472.07)	1367.70	(647.53,2462.74)	1919.97	(909.08,3457.22)	2530.76	(1422.25,3962.06)	3195.95	(1370.3,6169.86)	4040.32	(1881.29,7854.5)	5054.58	(1956.78,11405.04)	8292.64	(3998.88,14611.54)	13746.99	(5420.99,27267.42)	19303.78	(10495.9,33597.21)	25011.60	(11135.73,43977.19)	28242.96	(13562.1,46956.95)	28903.92	(13268.33,59777.63)	32868.57	(14966.85,67000.3)	39937.00	(18720.12,69669.08)	44934.55	(21505.74,75525.95)	49238.94	(28022.78,76865.69)
Lithuania	234.31	(110.54,425.29)	701.98	(331.16,1274.19)	1176.30	(554.94,2135.08)	1650.60	(778.68,2996.04)	2193.26	(1227.39,3455.79)	2801.59	(1188.72,5399.96)	3524.26	(1615.66,6709.97)	4356.80	(1653.64,9517.54)	7112.01	(3369.15,12688.15)	11770.20	(4657.63,23841.43)	16719.20	(9193.27,28707.32)	21995.30	(9951.94,40811.99)	25218.71	(12131.01,42606.32)	26286.11	(11746.38,56830.7)	30598.48	(14020.06,64787.69)	38008.81	(17707.36,68224.76)	43431.14	(19960.19,74689.79)	48337.02	(26437.51,77841.67)
Republic of Moldova	234.05	(109.82,429.94)	703.18	(329.93,1291.7)	1178.31	(552.86,2164.47)	1653.41	(775.79,3037.25)	2203.03	(1219.59,3504.91)	2824.82	(1212.7,5494.36)	3551.61	(1657.46,7083.83)	4381.52	(1626.68,9821.66)	7186.06	(3479.26,12889.23)	11948.12	(4720.35,23911.25)	16870.64	(9156.13,29702.69)	22060.30	(9755.79,40695.48)	25267.27	(11860.78,42627.96)	26394.68	(11728.35,56495.11)	30758.52	(14072.25,65037.83)	38344.07	(17733.96,69532.9)	43763.98	(20218.2,74568.54)	49032.71	(28582.17,77109.02)
Russian Federation	322.73	(152.8,594.93)	961.19	(455.28,1771.48)	1610.74	(763.19,2968.8)	2259.77	(1070.45,4165.47)	3345.77	(1968.66,5228.28)	4866.35	(2051.11,9410.23)	6811.86	(3287.2,13402.51)	9179.89	(3513.11,20370.82)	18250.43	(9022.55,30226.65)	34045.66	(14617.9,64840.35)	44867.87	(25457.36,76490.06)	50720.65	(25920.29,79391.68)	51329.98	(24778.29,78161.87)	46911.50	(23387.55,78710.84)	49107.48	(24241.8,84640.9)	57801.03	(28855.73,83976.66)	62757.96	(32018.32,89688.33)	63973.26	(37678.37,89023.31)
Ukraine	189.51	(88.05,342.82)	559.59	(259.98,1012.59)	937.67	(435.61,1697.11)	1315.75	(611.23,2381.9)	1970.11	(1102.83,3201.74)	2898.85	(1198.42,5582.91)	3850.98	(1827.62,7513.65)	4821.10	(1826.56,11171.23)	7216.59	(3455.63,12557.93)	11033.64	(4433.95,21839.39)	15576.36	(8502.52,27234.02)	20953.73	(9512.8,38072.95)	24585.19	(12043.22,40614.81)	26434.06	(11802.13,55420.12)	30905.52	(14558.49,62038.52)	38181.55	(17578.24,67369.42)	43253.65	(19764.24,74938.61)	47832.00	(25931.4,78191.93)
Western Europe	140.70	(60.2,255.77)	427.38	(182.8,777)	715.88	(306.19,1302.2)	1003.51	(429.3,1825.18)	1346.12	(722.49,2196.1)	1753.98	(719.98,3409.92)	2313.80	(1052.63,4487.01)	3015.53	(1087,6673.97)	5558.17	(2685.01,9633.51)	9945.67	(3921.06,20256.32)	14001.07	(7660.7,24169.93)	17743.10	(8117.51,31583.27)	19962.58	(9433.31,33890.08)	20717.08	(9541.49,42935.63)	22196.00	(10334.97,47824.46)	24415.16	(11578.47,43078.79)	24767.97	(10891.17,43656.82)	24780.97	(13493.95,45739.94)
Cyprus	141.44	(62.21,262.43)	435.05	(191.19,807.36)	728.58	(320.12,1352.14)	1023.99	(450.17,1900.04)	1323.49	(700.78,2170.26)	1624.72	(661.39,3182.57)	2100.87	(928.56,4098.56)	2750.03	(976.65,6232.8)	5310.17	(2567.84,9349.14)	9774.70	(3850.48,19982.99)	13735.95	(7579.49,23823.4)	17184.71	(7908.89,30763.74)	19177.89	(9087.04,32542.03)	19721.98	(9239.73,41113.75)	21030.11	(9800.72,45645.93)	23116.17	(11155.93,41460.16)	23355.31	(10397.7,41594.97)	22136.34	(10947.66,43040.57)
Greece	142.50	(61.46,267.96)	436.80	(188.46,821.19)	732.45	(316.11,1376.64)	1027.57	(443.43,1931.45)	1332.76	(710.98,2176.6)	1642.74	(666.04,3221.69)	2114.81	(935.36,4131.04)	2745.87	(992.47,6205.61)	5291.85	(2539.88,9270.14)	9748.15	(3905.17,19671.06)	13722.04	(7546.15,24032.44)	17218.90	(7744.03,31235.52)	19362.45	(9087.18,32412.57)	20126.42	(9153.84,41959.63)	21542.03	(10070.78,46687.97)	23642.63	(11090.19,42935.58)	23975.35	(10704.98,43165.18)	22483.14	(11927.44,41809.01)
Israel	141.93	(61.19,266.88)	436.56	(188.24,820.78)	731.63	(315.49,1375.46)	1026.75	(442.77,1930.2)	1327.57	(707.88,2168.05)	1632.70	(664.53,3204.13)	2104.74	(931.73,4125.95)	2737.25	(960.7,6183.36)	5285.57	(2574.66,9375.33)	9743.58	(3844.48,19975.36)	13708.07	(7409.27,24060.16)	17191.16	(7808.91,31191.26)	19250.35	(9060.48,33203.59)	19875.05	(9039.97,40327.16)	21242.97	(9873.75,45001.9)	23486.78	(10893.68,42449.74)	23829.88	(10492.76,42930.43)	22902.51	(12350.18,41913.62)
