# Supplementary material for: Age, Gender, and Socio-demographic Disparities in Near Vision Loss: A Global Burden of Disease Study Focusing on Belt and Road Countries
Source: Research Square preprint supplement (doi:10.21203/rs.3.rs-6582843/v1), 2025-06-09
Supplement: Supplementary file 2 [file 2500fa95f2d27bd70d209493.xlsx]

## Sheet: 特定年龄组YLDs
	AAPC among people aged 0-14 years			AAPC among people aged 15-49 years			AAPC among people aged 50-74 years			AAPC among people aged 75+ years
Global/Regions/Countries	AAPC 95%CI	P-Value		AAPC 95%CI	P-Value		AAPC 95%CI	P-Value		AAPC 95%CI	P-Value
Global	0.14(0.08,0.20)	0		2.45(2.22,2.69)	0		1.47(1.29,1.65)	0		0.12(0.05,0.20)	0.003199
SDI Regions
Low SDI	0.35(0.31,0.39)	0		1.36(1.16,1.57)	0		1.04(0.86,1.22)	0		0.15(0.11,0.19)	0
Low-middle SDI	0.48(0.41,0.54)	0		2.63(2.26,3.00)	0		1.28(1.04,1.52)	0		0.28(0.21,0.35)	0
Middle SDI	-0.05(-0.20,0.09)	0.441512		2.76(2.53,2.99)	0		1.63(1.41,1.86)	0		-0.01(-0.12,0.09)	0.795041
High-middle SDI	-0.65(-0.86,-0.44)	0		2.61(2.34,2.89)	0		1.66(1.48,1.85)	0		-0.18(-0.30,-0.06)	0.003999
High SDI	-0.22(-0.29,-0.15)	0		0.73(0.59,0.86)	0		0.68(0.59,0.76)	0		-0.19(-0.22,-0.17)	0
East Asia
China	-0.58(-0.85,-0.32)	0		3.52(3.22,3.82)	0		2.14(1.87,2.41)	0		-0.72(-0.88,-0.56)	0
Central Asia
Armenia	-0.26(-0.54,0.02)	0.065987		0.35(0.18,0.52)	0.0004		-0.09(-0.31,0.14)	0.380724		-0.04(-0.11,0.03)	0.241152
Azerbaijan	-0.09(-0.35,0.17)	0.439912		0.61(0.44,0.77)	0		-0.34(-0.58,-0.10)	0.003599		-0.17(-0.23,-0.11)	0
Georgia	-0.19(-0.40,0.03)	0.092781		0.84(0.69,1.00)	0		-0.09(-0.30,0.13)	0.387522		0.11(-0.04,0.26)	0.15037
Kazakhstan	-0.70(-1.10,-0.30)	0		0.86(0.50,1.22)	0		0.20(0.02,0.39)	0.034793		-0.30(-0.43,-0.18)	0
Kyrgyzstan	-0.23(-0.45,-0.01)	0.042791		0.37(0.27,0.48)	0		-0.39(-0.57,-0.21)	0		-0.05(-0.09,0.00)	0.038792
Mongolia	-0.41(-0.68,-0.15)	0.0024		0.77(0.73,0.80)	0		-0.32(-0.40,-0.23)	0		-0.05(-0.07,-0.03)	0
Tajikistan	-0.04(-0.22,0.14)	0.619076		0.41(0.35,0.48)	0		-0.41(-0.61,-0.21)	0		-0.15(-0.19,-0.12)	0
Turkmenistan	0.03(-0.07,0.14)	0.563887		0.52(0.40,0.63)	0		-0.29(-0.44,-0.15)	0		-0.03(-0.07,0.01)	0.093581
Uzbekistan	-0.16(-0.37,0.05)	0.127574		0.53(0.45,0.61)	0		-0.34(-0.49,-0.19)	0		-0.16(-0.20,-0.11)	0
South Asia
Bangladesh	0.41(0.31,0.50)	0		1.98(1.10,2.86)	0.0004		0.60(0.18,1.03)	0.008398		-0.35(-0.67,-0.05)	0.026395
Bhutan	0.14(0.06,0.22)	0.0004		0.64(0.53,0.76)	0		-0.01(-0.03,0.01)	0.514297		-0.11(-0.12,-0.10)	0
India	0.73(0.62,0.83)	0		4.32(3.69,4.97)	0		2.22(1.80,2.66)	0		0.39(0.24,0.54)	0
Nepal	0.64(0.51,0.77)	0		2.88(2.26,3.52)	0		2.64(2.10,3.19)	0		-0.49(-0.60,-0.39)	0
Pakistan	0.29(0.15,0.44)	0.0004		0.98(0.33,1.62)	0.005199		0.45(0.09,0.81)	0.012797		-0.29(-0.50,-0.07)	0.010398
Southeast Asia
Cambodia	0.11(-0.03,0.25)	0.109578		0.30(0.28,0.32)	0		-0.07(-0.10,-0.05)	0		0.01(0.00,0.01)	0.206759
Indonesia	-0.45(-0.59,-0.30)	0		0.67(0.64,0.71)	0		0.73(0.51,0.95)	0		0.28(0.18,0.39)	0
Lao People's Democratic Republic	0.54(0.36,0.73)	0		1.12(0.43,1.81)	0.0024		-0.16(-0.20,-0.12)	0		-0.28(-0.46,-0.10)	0.002799
Malaysia	0.38(0.28,0.49)	0		0.53(0.33,0.73)	0		0.44(0.10,0.79)	0.010798		-0.07(-0.10,-0.04)	0
Maldives	0.04(-0.21,0.29)	0.764647		0.66(0.57,0.75)	0		-0.15(-0.27,-0.02)	0.020396		0.10(0.06,0.13)	0
Myanmar	0.27(0.02,0.52)	0.033593		1.40(0.95,1.87)	0		0.01(-0.07,0.09)	0.838232		-0.25(-0.43,-0.07)	0.007199
Philippines	-0.53(-1.00,-0.07)	0.027195		-0.26(-0.67,0.14)	0.195161		0.54(0.14,0.94)	0.009998		0.31(0.09,0.52)	0.007998
Sri Lanka	0.42(-0.01,0.86)	0.054389		0.81(0.64,0.98)	0		0.21(0.08,0.34)	0.004799		0.00(-0.05,0.05)	0.939012
Thailand	0.09(0.04,0.14)	0.0008		1.06(0.96,1.16)	0		0.03(0.00,0.07)	0.079184		0.01(-0.01,0.02)	0.219156
Viet Nam	0.08(-0.03,0.20)	0.156369		1.60(1.09,2.11)	0		-0.31(-0.43,-0.18)	0		-0.01(-0.04,0.03)	0.619076
High-income Asia pacific
Brunei Darussalam	0.28(0.19,0.38)	0		0.62(0.49,0.74)	0		0.01(0.00,0.02)	0.187163		0.07(0.04,0.11)	0.0004
Singapore	-0.15(-0.38,0.09)	0.185963		0.75(0.63,0.87)	0		-0.03(-0.04,-0.01)	0.0004		-0.04(-0.05,-0.03)	0
North Africa and Middle East
Afghanistan	0.31(0.16,0.46)	0.0004		0.19(-0.15,0.52)	0.244351		-0.03(-0.14,0.09)	0.616677		0.00(-0.03,0.02)	0.731454
Bahrain	0.15(0.09,0.20)	0		0.54(0.45,0.62)	0		-0.24(-0.33,-0.14)	0		0.03(-0.03,0.08)	0.371926
Egypt	-0.36(-0.46,-0.25)	0		0.44(0.32,0.57)	0		0.71(0.43,1.01)	0		0.15(0.09,0.20)	0
Iran (Islamic Republic of)	-0.34(-0.54,-0.13)	0.0012		1.22(0.97,1.48)	0		0.29(0.21,0.36)	0		0.60(0.31,0.89)	0.0008
Iraq	0.18(0.12,0.23)	0		0.47(0.41,0.52)	0		-0.10(-0.12,-0.09)	0		-0.08(-0.10,-0.07)	0
Jordan	0.23(0.13,0.32)	0		0.68(0.62,0.73)	0		-0.04(-0.11,0.02)	0.14797		-0.11(-0.14,-0.09)	0
Kuwait	0.05(-0.04,0.15)	0.275545		0.82(0.70,0.94)	0		-0.11(-0.16,-0.05)	0		-0.06(-0.14,0.01)	0.087183
Lebanon	-0.10(-0.21,0.01)	0.078384		0.66(0.51,0.81)	0		0.46(0.34,0.59)	0		0.56(0.33,0.80)	0
Oman	-0.20(-0.41,0.02)	0.069586		0.21(0.07,0.35)	0.002799		-0.10(-0.11,-0.08)	0		-0.11(-0.13,-0.09)	0
Palestine	0.25(0.20,0.30)	0		0.32(0.29,0.34)	0		-0.24(-0.26,-0.22)	0		0.01(-0.02,0.03)	0.579884
Qatar	-0.14(-0.28,0.00)	0.053989		-0.06(-0.28,0.17)	0.566687		-0.12(-0.18,-0.05)	0		-0.03(-0.07,0.02)	0.20076
Saudi Arabia	0.12(0.03,0.21)	0.011598		0.53(0.45,0.61)	0		-0.14(-0.15,-0.12)	0		-0.05(-0.08,-0.01)	0.016797
Syrian Arab Republic	0.91(0.59,1.24)	0		2.01(1.39,2.66)	0		0.17(0.08,0.26)	0		-0.07(-0.15,0.02)	0.092382
Turkey	-0.30(-0.40,-0.20)	0		1.10(1.00,1.21)	0		0.63(0.47,0.78)	0		0.55(0.22,0.89)	0.0024
United Arab Emirates	0.00(-0.08,0.08)	0.958608		1.06(0.42,1.72)	0.002		0.14(-0.12,0.41)	0.264747		-0.88(-1.12,-0.64)	0
Yemen	0.06(-0.03,0.16)	0.205159		0.11(-0.02,0.23)	0.085583		-0.02(-0.03,0.00)	0.033993		-0.09(-0.10,-0.08)	0
Eastern Europe
Belarus	-0.36(-0.63,-0.09)	0.009198		0.42(0.31,0.54)	0		-0.08(-0.18,0.01)	0.088382		0.02(-0.05,0.09)	0.496701
Estonia	-0.30(-0.56,-0.04)	0.027195		0.27(0.22,0.32)	0		0.58(0.15,1.02)	0.008798		0.07(0.03,0.12)	0.003199
Latvia	-0.45(-0.82,-0.09)	0.016797		0.25(0.18,0.32)	0		0.42(0.18,0.66)	0.0016		0.53(0.06,1.00)	0.027594
Lithuania	-0.18(-0.40,0.04)	0.10238		0.44(0.37,0.50)	0		-0.02(-0.06,0.02)	0.293141		-0.02(-0.06,0.02)	0.264747
Republic of Moldova	-0.13(-0.35,0.09)	0.206359		0.41(0.26,0.55)	0		-0.03(-0.10,0.03)	0.293541		0.11(0.08,0.13)	0
Russian Federation	-0.42(-0.70,-0.13)	0.003999		2.84(2.27,3.44)	0		2.19(1.70,2.68)	0		0.52(0.40,0.65)	0
Ukraine	-0.15(-0.43,0.13)	0.244751		0.80(0.44,1.18)	0.0008		0.06(-0.03,0.15)	0.207159		-0.03(-0.07,0.02)	0.19836

## Sheet: 不同地区和国家
	AAPC of ylds among people aged 0-14 years		AAPC of ylds among people aged 15-49 years		AAPC of ylds among people aged 50-74 years		AAPC of ylds among people aged 75+ years
East Asia
China	-0.58(-0.85,-0.32)	0	3.52(3.22,3.82)	0	2.14(1.87,2.41)	0	-0.72(-0.88,-0.56)	0
Central Asia
Armenia	-0.26(-0.54,0.02)	0.065987	0.35(0.18,0.52)	0.0004	-0.09(-0.31,0.14)	0.380724	-0.04(-0.11,0.03)	0.241152
Azerbaijan	-0.09(-0.35,0.17)	0.439912	0.61(0.44,0.77)	0	-0.34(-0.58,-0.10)	0.003599	-0.17(-0.23,-0.11)	0
Georgia	-0.19(-0.40,0.03)	0.092781	0.84(0.69,1.00)	0	-0.09(-0.30,0.13)	0.387522	0.11(-0.04,0.26)	0.15037
Kazakhstan	-0.70(-1.10,-0.30)	0	0.86(0.50,1.22)	0	0.20(0.02,0.39)	0.034793	-0.30(-0.43,-0.18)	0
Kyrgyzstan	-0.23(-0.45,-0.01)	0.042791	0.37(0.27,0.48)	0	-0.39(-0.57,-0.21)	0	-0.05(-0.09,0.00)	0.038792
Mongolia	-0.41(-0.68,-0.15)	0.0024	0.77(0.73,0.80)	0	-0.32(-0.40,-0.23)	0	-0.05(-0.07,-0.03)	0
Tajikistan	-0.04(-0.22,0.14)	0.619076	0.41(0.35,0.48)	0	-0.41(-0.61,-0.21)	0	-0.15(-0.19,-0.12)	0
Turkmenistan	0.03(-0.07,0.14)	0.563887	0.52(0.40,0.63)	0	-0.29(-0.44,-0.15)	0	-0.03(-0.07,0.01)	0.093581
Uzbekistan	-0.16(-0.37,0.05)	0.127574	0.53(0.45,0.61)	0	-0.34(-0.49,-0.19)	0	-0.16(-0.20,-0.11)	0
South Asia
Bangladesh	0.41(0.31,0.50)	0	1.98(1.10,2.86)	0.0004	0.60(0.18,1.03)	0.008398	-0.35(-0.67,-0.05)	0.026395
Bhutan	0.14(0.06,0.22)	0.0004	0.64(0.53,0.76)	0	-0.01(-0.03,0.01)	0.514297	-0.11(-0.12,-0.10)	0
India	0.73(0.62,0.83)	0	4.32(3.69,4.97)	0	2.22(1.80,2.66)	0	0.39(0.24,0.54)	0
Nepal	0.64(0.51,0.77)	0	2.88(2.26,3.52)	0	2.64(2.10,3.19)	0	-0.49(-0.60,-0.39)	0
Pakistan	0.29(0.15,0.44)	0.0004	0.98(0.33,1.62)	0.005199	0.45(0.09,0.81)	0.012797	-0.29(-0.50,-0.07)	0.010398
Southeast Asia
Cambodia	0.11(-0.03,0.25)	0.109578	0.30(0.28,0.32)	0	-0.07(-0.10,-0.05)	0	0.01(0.00,0.01)	0.206759
Indonesia	-0.45(-0.59,-0.30)	0	0.67(0.64,0.71)	0	0.73(0.51,0.95)	0	0.28(0.18,0.39)	0
Lao People's Democratic Republic	0.54(0.36,0.73)	0	1.12(0.43,1.81)	0.0024	-0.16(-0.20,-0.12)	0	-0.28(-0.46,-0.10)	0.002799
Malaysia	0.38(0.28,0.49)	0	0.53(0.33,0.73)	0	0.44(0.10,0.79)	0.010798	-0.07(-0.10,-0.04)	0
Maldives	0.04(-0.21,0.29)	0.764647	0.66(0.57,0.75)	0	-0.15(-0.27,-0.02)	0.020396	0.10(0.06,0.13)	0
Myanmar	0.27(0.02,0.52)	0.033593	1.40(0.95,1.87)	0	0.01(-0.07,0.09)	0.838232	-0.25(-0.43,-0.07)	0.007199
Philippines	-0.53(-1.00,-0.07)	0.027195	-0.26(-0.67,0.14)	0.195161	0.54(0.14,0.94)	0.009998	0.31(0.09,0.52)	0.007998
Sri Lanka	0.42(-0.01,0.86)	0.054389	0.81(0.64,0.98)	0	0.21(0.08,0.34)	0.004799	0.00(-0.05,0.05)	0.939012
Thailand	0.09(0.04,0.14)	0.0008	1.06(0.96,1.16)	0	0.03(0.00,0.07)	0.079184	0.01(-0.01,0.02)	0.219156
Viet Nam	0.08(-0.03,0.20)	0.156369	1.60(1.09,2.11)	0	-0.31(-0.43,-0.18)	0	-0.01(-0.04,0.03)	0.619076
High-income Asia pacific
Brunei Darussalam	0.28(0.19,0.38)	0	0.62(0.49,0.74)	0	0.01(0.00,0.02)	0.187163	0.07(0.04,0.11)	0.0004
Singapore	-0.15(-0.38,0.09)	0.185963	0.75(0.63,0.87)	0	-0.03(-0.04,-0.01)	0.0004	-0.04(-0.05,-0.03)	0
North Africa and Middle East
Afghanistan	0.31(0.16,0.46)	0.0004	0.19(-0.15,0.52)	0.244351	-0.03(-0.14,0.09)	0.616677	0.00(-0.03,0.02)	0.731454
Bahrain	0.15(0.09,0.20)	0	0.54(0.45,0.62)	0	-0.24(-0.33,-0.14)	0	0.03(-0.03,0.08)	0.371926
Egypt	-0.36(-0.46,-0.25)	0	0.44(0.32,0.57)	0	0.71(0.43,1.01)	0	0.15(0.09,0.20)	0
Iran (Islamic Republic of)	-0.34(-0.54,-0.13)	0.0012	1.22(0.97,1.48)	0	0.29(0.21,0.36)	0	0.60(0.31,0.89)	0.0008
Iraq	0.18(0.12,0.23)	0	0.47(0.41,0.52)	0	-0.10(-0.12,-0.09)	0	-0.08(-0.10,-0.07)	0
Jordan	0.23(0.13,0.32)	0	0.68(0.62,0.73)	0	-0.04(-0.11,0.02)	0.14797	-0.11(-0.14,-0.09)	0
Kuwait	0.05(-0.04,0.15)	0.275545	0.82(0.70,0.94)	0	-0.11(-0.16,-0.05)	0	-0.06(-0.14,0.01)	0.087183
Lebanon	-0.10(-0.21,0.01)	0.078384	0.66(0.51,0.81)	0	0.46(0.34,0.59)	0	0.56(0.33,0.80)	0
Oman	-0.20(-0.41,0.02)	0.069586	0.21(0.07,0.35)	0.002799	-0.10(-0.11,-0.08)	0	-0.11(-0.13,-0.09)	0
Palestine	0.25(0.20,0.30)	0	0.32(0.29,0.34)	0	-0.24(-0.26,-0.22)	0	0.01(-0.02,0.03)	0.579884
Qatar	-0.14(-0.28,0.00)	0.053989	-0.06(-0.28,0.17)	0.566687	-0.12(-0.18,-0.05)	0	-0.03(-0.07,0.02)	0.20076
Saudi Arabia	0.12(0.03,0.21)	0.011598	0.53(0.45,0.61)	0	-0.14(-0.15,-0.12)	0	-0.05(-0.08,-0.01)	0.016797
Syrian Arab Republic	0.91(0.59,1.24)	0	2.01(1.39,2.66)	0	0.17(0.08,0.26)	0	-0.07(-0.15,0.02)	0.092382
Turkey	-0.30(-0.40,-0.20)	0	1.10(1.00,1.21)	0	0.63(0.47,0.78)	0	0.55(0.22,0.89)	0.0024
United Arab Emirates	0.00(-0.08,0.08)	0.958608	1.06(0.42,1.72)	0.002	0.14(-0.12,0.41)	0.264747	-0.88(-1.12,-0.64)	0
Yemen	0.06(-0.03,0.16)	0.205159	0.11(-0.02,0.23)	0.085583	-0.02(-0.03,0.00)	0.033993	-0.09(-0.10,-0.08)	0
Central Europe
Albania	0.12(-0.09,0.34)	0.231954	0.45(0.28,0.63)	0	0.10(0.07,0.12)	0	-0.07(-0.09,-0.05)	0
Bosnia and Herzegovina	-0.06(-0.16,0.04)	0.211558	0.38(0.21,0.55)	0	0.15(0.09,0.21)	0	0.17(-0.10,0.44)	0.211158
Bulgaria	-0.34(-0.50,-0.16)	0	0.37(0.25,0.50)	0	0.04(0.00,0.08)	0.036393	0.20(0.14,0.26)	0
Croatia	-0.36(-0.56,-0.17)	0	0.27(0.23,0.32)	0	0.35(0.03,0.68)	0.036393	0.34(-0.13,0.81)	0.133973
Czechia	-0.49(-0.71,-0.28)	0	0.49(0.20,0.79)	0.0012	0.21(-0.02,0.43)	0.072386	0.01(-0.05,0.07)	0.808638
Hungary	-0.17(-0.23,-0.11)	0	0.69(0.29,1.11)	0.0016	0.38(0.07,0.70)	0.018796	0.46(0.24,0.68)	0.0008
Montenegro	-0.09(-0.14,-0.05)	0	0.35(0.26,0.45)	0	0.00(-0.06,0.06)	0.89982	-0.22(-0.29,-0.16)	0
North Macedonia	-0.06(-0.16,0.04)	0.175965	0.39(0.33,0.45)	0	-0.01(-0.06,0.04)	0.760648	-0.22(-0.36,-0.06)	0.004399
Poland	-0.35(-0.48,-0.21)	0	0.20(0.05,0.35)	0.011598	-0.01(-0.12,0.10)	0.789442	0.10(0.02,0.19)	0.013997
Romania	-0.24(-0.34,-0.14)	0	0.67(0.56,0.78)	0	0.05(0.00,0.10)	0.041992	0.16(0.07,0.25)	0.0012
Serbia	-0.05(-0.11,0.00)	0.065187	0.24(0.16,0.32)	0	0.02(-0.02,0.06)	0.237153	0.08(-0.08,0.24)	0.330734
Slovakia	-0.18(-0.29,-0.06)	0.0024	0.76(0.43,1.10)	0	-0.14(-0.32,0.03)	0.107978	0.29(0.04,0.54)	0.020796
Slovenia	-0.34(-0.46,-0.22)	0	0.59(0.54,0.64)	0	0.38(0.11,0.65)	0.007998	0.12(-0.01,0.26)	0.065987
Eastern Europe
Belarus	-0.36(-0.63,-0.09)	0.009198	0.42(0.31,0.54)	0	-0.08(-0.18,0.01)	0.088382	0.02(-0.05,0.09)	0.496701
Estonia	-0.30(-0.56,-0.04)	0.027195	0.27(0.22,0.32)	0	0.58(0.15,1.02)	0.008798	0.07(0.03,0.12)	0.003199
Latvia	-0.45(-0.82,-0.09)	0.016797	0.25(0.18,0.32)	0	0.42(0.18,0.66)	0.0016	0.53(0.06,1.00)	0.027594
Lithuania	-0.18(-0.40,0.04)	0.10238	0.44(0.37,0.50)	0	-0.02(-0.06,0.02)	0.293141	-0.02(-0.06,0.02)	0.264747
Republic of Moldova	-0.13(-0.35,0.09)	0.206359	0.41(0.26,0.55)	0	-0.03(-0.10,0.03)	0.293541	0.11(0.08,0.13)	0
Russian Federation	-0.42(-0.70,-0.13)	0.003999	2.84(2.27,3.44)	0	2.19(1.70,2.68)	0	0.52(0.40,0.65)	0
Ukraine	-0.15(-0.43,0.13)	0.244751	0.80(0.44,1.18)	0.0008	0.06(-0.03,0.15)	0.207159	-0.03(-0.07,0.02)	0.19836
Western Europe
Cyprus	-0.20(-0.32,-0.08)	0.0008	0.22(0.16,0.28)	0	-0.03(-0.06,0.00)	0.063187	-0.05(-0.09,-0.01)	0.009598
Greece	-0.17(-0.25,-0.08)	0	0.69(0.62,0.76)	0	-0.02(-0.04,0.01)	0.179164	-0.04(-0.06,-0.02)	0
Israel	-0.11(-0.13,-0.08)	0	0.20(0.12,0.29)	0	-0.05(-0.11,0.01)	0.096381	-0.02(-0.05,0.01)	0.122376

## Sheet: 不同SDI
	AAPC among people aged 0-14 years		AAPC among people aged 15-49 years		AAPC among people aged 50-74 years		AAPC among people aged 75+ years
Low SDI	0.35(0.31,0.39)	0	1.36(1.16,1.57)	0	1.04(0.86,1.22)	0	0.15(0.11,0.19)	0
Low-middle SDI	0.48(0.41,0.54)	0	2.63(2.26,3.00)	0	1.28(1.04,1.52)	0	0.28(0.21,0.35)	0
Middle SDI	-0.05(-0.20,0.09)	0.441512	2.76(2.53,2.99)	0	1.63(1.41,1.86)	0	-0.01(-0.12,0.09)	0.795041
High-middle SDI	-0.65(-0.86,-0.44)	0	2.61(2.34,2.89)	0	1.66(1.48,1.85)	0	-0.18(-0.30,-0.06)	0.003999
High SDI	-0.22(-0.29,-0.15)	0	0.73(0.59,0.86)	0	0.68(0.59,0.76)	0	-0.19(-0.22,-0.17)	0

## Sheet: 不同国家标不同颜色
	AAPC among people aged 0-14 years			AAPC among people aged 15-49 years			AAPC among people aged 50-74 years			AAPC among people aged 75+ years
Global/Regions/Countries	AAPC 95%CI	P-Value		AAPC 95%CI	P-Value		AAPC 95%CI	P-Value		AAPC 95%CI	P-Value
Global	0.14(0.08,0.20)	0		2.45(2.22,2.69)	0		1.47(1.29,1.65)	0		0.12(0.05,0.20)	0.003199
SDI Regions
Low SDI	0.35(0.31,0.39)	0		1.36(1.16,1.57)	0		1.04(0.86,1.22)	0		0.15(0.11,0.19)	0
Low-middle SDI	0.48(0.41,0.54)	0		2.63(2.26,3.00)	0		1.28(1.04,1.52)	0		0.28(0.21,0.35)	0
Middle SDI	-0.05(-0.20,0.09)	0.441512		2.76(2.53,2.99)	0		1.63(1.41,1.86)	0		-0.01(-0.12,0.09)	0.795041
High-middle SDI	-0.65(-0.86,-0.44)	0		2.61(2.34,2.89)	0		1.66(1.48,1.85)	0		-0.18(-0.30,-0.06)	0.003999
High SDI	-0.22(-0.29,-0.15)	0		0.73(0.59,0.86)	0		0.68(0.59,0.76)	0		-0.19(-0.22,-0.17)	0
East Asia
China	-0.58(-0.85,-0.32)	0		3.52(3.22,3.82)	0		2.14(1.87,2.41)	0		-0.72(-0.88,-0.56)	0
Central Asia
Armenia	-0.26(-0.54,0.02)	0.065987		0.35(0.18,0.52)	0.0004		-0.09(-0.31,0.14)	0.380724		-0.04(-0.11,0.03)	0.241152
Azerbaijan	-0.09(-0.35,0.17)	0.439912		0.61(0.44,0.77)	0		-0.34(-0.58,-0.10)	0.003599		-0.17(-0.23,-0.11)	0
Georgia	-0.19(-0.40,0.03)	0.092781		0.84(0.69,1.00)	0		-0.09(-0.30,0.13)	0.387522		0.11(-0.04,0.26)	0.15037
Kazakhstan	-0.70(-1.10,-0.30)	0		0.86(0.50,1.22)	0		0.20(0.02,0.39)	0.034793		-0.30(-0.43,-0.18)	0
Kyrgyzstan	-0.23(-0.45,-0.01)	0.042791		0.37(0.27,0.48)	0		-0.39(-0.57,-0.21)	0		-0.05(-0.09,0.00)	0.038792
Mongolia	-0.41(-0.68,-0.15)	0.0024		0.77(0.73,0.80)	0		-0.32(-0.40,-0.23)	0		-0.05(-0.07,-0.03)	0
Tajikistan	-0.04(-0.22,0.14)	0.619076		0.41(0.35,0.48)	0		-0.41(-0.61,-0.21)	0		-0.15(-0.19,-0.12)	0
Turkmenistan	0.03(-0.07,0.14)	0.563887		0.52(0.40,0.63)	0		-0.29(-0.44,-0.15)	0		-0.03(-0.07,0.01)	0.093581
Uzbekistan	-0.16(-0.37,0.05)	0.127574		0.53(0.45,0.61)	0		-0.34(-0.49,-0.19)	0		-0.16(-0.20,-0.11)	0
South Asia
Bangladesh	0.41(0.31,0.50)	0		1.98(1.10,2.86)	0.0004		0.60(0.18,1.03)	0.008398		-0.35(-0.67,-0.05)	0.026395
Bhutan	0.14(0.06,0.22)	0.0004		0.64(0.53,0.76)	0		-0.01(-0.03,0.01)	0.514297		-0.11(-0.12,-0.10)	0
India	0.73(0.62,0.83)	0		4.32(3.69,4.97)	0		2.22(1.80,2.66)	0		0.39(0.24,0.54)	0
Nepal	0.64(0.51,0.77)	0		2.88(2.26,3.52)	0		2.64(2.10,3.19)	0		-0.49(-0.60,-0.39)	0
Pakistan	0.29(0.15,0.44)	0.0004		0.98(0.33,1.62)	0.005199		0.45(0.09,0.81)	0.012797		-0.29(-0.50,-0.07)	0.010398
Southeast Asia
Cambodia	0.11(-0.03,0.25)	0.109578		0.30(0.28,0.32)	0		-0.07(-0.10,-0.05)	0		0.01(0.00,0.01)	0.206759
Indonesia	-0.45(-0.59,-0.30)	0		0.67(0.64,0.71)	0		0.73(0.51,0.95)	0		0.28(0.18,0.39)	0
Lao People's Democratic Republic	0.54(0.36,0.73)	0		1.12(0.43,1.81)	0.0024		-0.16(-0.20,-0.12)	0		-0.28(-0.46,-0.10)	0.002799
Malaysia	0.38(0.28,0.49)	0		0.53(0.33,0.73)	0		0.44(0.10,0.79)	0.010798		-0.07(-0.10,-0.04)	0
Maldives	0.04(-0.21,0.29)	0.764647		0.66(0.57,0.75)	0		-0.15(-0.27,-0.02)	0.020396		0.10(0.06,0.13)	0
Myanmar	0.27(0.02,0.52)	0.033593		1.40(0.95,1.87)	0		0.01(-0.07,0.09)	0.838232		-0.25(-0.43,-0.07)	0.007199
Philippines	-0.53(-1.00,-0.07)	0.027195		-0.26(-0.67,0.14)	0.195161		0.54(0.14,0.94)	0.009998		0.31(0.09,0.52)	0.007998
Sri Lanka	0.42(-0.01,0.86)	0.054389		0.81(0.64,0.98)	0		0.21(0.08,0.34)	0.004799		0.00(-0.05,0.05)	0.939012
Thailand	0.09(0.04,0.14)	0.0008		1.06(0.96,1.16)	0		0.03(0.00,0.07)	0.079184		0.01(-0.01,0.02)	0.219156
Viet Nam	0.08(-0.03,0.20)	0.156369		1.60(1.09,2.11)	0		-0.31(-0.43,-0.18)	0		-0.01(-0.04,0.03)	0.619076
High-income Asia pacific
Brunei Darussalam	0.28(0.19,0.38)	0		0.62(0.49,0.74)	0		0.01(0.00,0.02)	0.187163		0.07(0.04,0.11)	0.0004
Singapore	-0.15(-0.38,0.09)	0.185963		0.75(0.63,0.87)	0		-0.03(-0.04,-0.01)	0.0004		-0.04(-0.05,-0.03)	0
North Africa and Middle East
Afghanistan	0.31(0.16,0.46)	0.0004		0.19(-0.15,0.52)	0.244351		-0.03(-0.14,0.09)	0.616677		0.00(-0.03,0.02)	0.731454
Bahrain	0.15(0.09,0.20)	0		0.54(0.45,0.62)	0		-0.24(-0.33,-0.14)	0		0.03(-0.03,0.08)	0.371926
Egypt	-0.36(-0.46,-0.25)	0		0.44(0.32,0.57)	0		0.71(0.43,1.01)	0		0.15(0.09,0.20)	0
Iran (Islamic Republic of)	-0.34(-0.54,-0.13)	0.0012		1.22(0.97,1.48)	0		0.29(0.21,0.36)	0		0.60(0.31,0.89)	0.0008
Iraq	0.18(0.12,0.23)	0		0.47(0.41,0.52)	0		-0.10(-0.12,-0.09)	0		-0.08(-0.10,-0.07)	0
Jordan	0.23(0.13,0.32)	0		0.68(0.62,0.73)	0		-0.04(-0.11,0.02)	0.14797		-0.11(-0.14,-0.09)	0
Kuwait	0.05(-0.04,0.15)	0.275545		0.82(0.70,0.94)	0		-0.11(-0.16,-0.05)	0		-0.06(-0.14,0.01)	0.087183
Lebanon	-0.10(-0.21,0.01)	0.078384		0.66(0.51,0.81)	0		0.46(0.34,0.59)	0		0.56(0.33,0.80)	0
Oman	-0.20(-0.41,0.02)	0.069586		0.21(0.07,0.35)	0.002799		-0.10(-0.11,-0.08)	0		-0.11(-0.13,-0.09)	0
Palestine	0.25(0.20,0.30)	0		0.32(0.29,0.34)	0		-0.24(-0.26,-0.22)	0		0.01(-0.02,0.03)	0.579884
Qatar	-0.14(-0.28,0.00)	0.053989		-0.06(-0.28,0.17)	0.566687		-0.12(-0.18,-0.05)	0		-0.03(-0.07,0.02)	0.20076
Saudi Arabia	0.12(0.03,0.21)	0.011598		0.53(0.45,0.61)	0		-0.14(-0.15,-0.12)	0		-0.05(-0.08,-0.01)	0.016797
Syrian Arab Republic	0.91(0.59,1.24)	0		2.01(1.39,2.66)	0		0.17(0.08,0.26)	0		-0.07(-0.15,0.02)	0.092382
Turkey	-0.30(-0.40,-0.20)	0		1.10(1.00,1.21)	0		0.63(0.47,0.78)	0		0.55(0.22,0.89)	0.0024
United Arab Emirates	0.00(-0.08,0.08)	0.958608		1.06(0.42,1.72)	0.002		0.14(-0.12,0.41)	0.264747		-0.88(-1.12,-0.64)	0
Yemen	0.06(-0.03,0.16)	0.205159		0.11(-0.02,0.23)	0.085583		-0.02(-0.03,0.00)	0.033993		-0.09(-0.10,-0.08)	0
Central Europe
Albania	0.12(-0.09,0.34)	0.231954		0.45(0.28,0.63)	0		0.10(0.07,0.12)	0		-0.07(-0.09,-0.05)	0
Bosnia and Herzegovina	-0.06(-0.16,0.04)	0.211558		0.38(0.21,0.55)	0		0.15(0.09,0.21)	0		0.17(-0.10,0.44)	0.211158
Bulgaria	-0.34(-0.50,-0.16)	0		0.37(0.25,0.50)	0		0.04(0.00,0.08)	0.036393		0.20(0.14,0.26)	0
Croatia	-0.36(-0.56,-0.17)	0		0.27(0.23,0.32)	0		0.35(0.03,0.68)	0.036393		0.34(-0.13,0.81)	0.133973
Czechia	-0.49(-0.71,-0.28)	0		0.49(0.20,0.79)	0.0012		0.21(-0.02,0.43)	0.072386		0.01(-0.05,0.07)	0.808638
Hungary	-0.17(-0.23,-0.11)	0		0.69(0.29,1.11)	0.0016		0.38(0.07,0.70)	0.018796		0.46(0.24,0.68)	0.0008
Montenegro	-0.09(-0.14,-0.05)	0		0.35(0.26,0.45)	0		0.00(-0.06,0.06)	0.89982		-0.22(-0.29,-0.16)	0
North Macedonia	-0.06(-0.16,0.04)	0.175965		0.39(0.33,0.45)	0		-0.01(-0.06,0.04)	0.760648		-0.22(-0.36,-0.06)	0.004399
Poland	-0.35(-0.48,-0.21)	0		0.20(0.05,0.35)	0.011598		-0.01(-0.12,0.10)	0.789442		0.10(0.02,0.19)	0.013997
Romania	-0.24(-0.34,-0.14)	0		0.67(0.56,0.78)	0		0.05(0.00,0.10)	0.041992		0.16(0.07,0.25)	0.0012
Serbia	-0.05(-0.11,0.00)	0.065187		0.24(0.16,0.32)	0		0.02(-0.02,0.06)	0.237153		0.08(-0.08,0.24)	0.330734
Slovakia	-0.18(-0.29,-0.06)	0.0024		0.76(0.43,1.10)	0		-0.14(-0.32,0.03)	0.107978		0.29(0.04,0.54)	0.020796
Slovenia	-0.34(-0.46,-0.22)	0		0.59(0.54,0.64)	0		0.38(0.11,0.65)	0.007998		0.12(-0.01,0.26)	0.065987
Eastern Europe
Belarus	-0.36(-0.63,-0.09)	0.009198		0.42(0.31,0.54)	0		-0.08(-0.18,0.01)	0.088382		0.02(-0.05,0.09)	0.496701
Estonia	-0.30(-0.56,-0.04)	0.027195		0.27(0.22,0.32)	0		0.58(0.15,1.02)	0.008798		0.07(0.03,0.12)	0.003199
Latvia	-0.45(-0.82,-0.09)	0.016797		0.25(0.18,0.32)	0		0.42(0.18,0.66)	0.0016		0.53(0.06,1.00)	0.027594
Lithuania	-0.18(-0.40,0.04)	0.10238		0.44(0.37,0.50)	0		-0.02(-0.06,0.02)	0.293141		-0.02(-0.06,0.02)	0.264747
Republic of Moldova	-0.13(-0.35,0.09)	0.206359		0.41(0.26,0.55)	0		-0.03(-0.10,0.03)	0.293541		0.11(0.08,0.13)	0
Russian Federation	-0.42(-0.70,-0.13)	0.003999		2.84(2.27,3.44)	0		2.19(1.70,2.68)	0		0.52(0.40,0.65)	0
Ukraine	-0.15(-0.43,0.13)	0.244751		0.80(0.44,1.18)	0.0008		0.06(-0.03,0.15)	0.207159		-0.03(-0.07,0.02)	0.19836
Western Europe
Cyprus	-0.20(-0.32,-0.08)	0.0008		0.22(0.16,0.28)	0		-0.03(-0.06,0.00)	0.063187		-0.05(-0.09,-0.01)	0.009598
Greece	-0.17(-0.25,-0.08)	0		0.69(0.62,0.76)	0		-0.02(-0.04,0.01)	0.179164		-0.04(-0.06,-0.02)	0
Israel	-0.11(-0.13,-0.08)	0		0.20(0.12,0.29)	0		-0.05(-0.11,0.01)	0.096381		-0.02(-0.05,0.01)	0.122376
