# Supplementary material for: Age, Gender, and Socio-demographic Disparities in Near Vision Loss: A Global Burden of Disease Study Focusing on Belt and Road Countries
Source: Research Square preprint supplement (doi:10.21203/rs.3.rs-6582843/v1), 2025-06-09
Supplement: Supplementary file 3 [file 2c78f8756148ba579fd258ab.xlsx]

## Sheet: YLDs
	Prevalence, 1990-2021		Prevalence, 2012-2021		YLDs, 1990-2021		YLDs, 2012-2021
Gobal/Regions/Countries	AAPC, 95%CI(%)	P value	AAPC, 95%CI(%)	P value	AAPC, 95%CI(%)	P value	AAPC, 95%CI(%)	P value
Global	1.04 (1.00, 1.09)	＜0.001	1.53 (1.41, 1.63)	＜0.001	1.06 (1.01, 1.10)	＜0.001	1.54 (1.42, 1.64)	＜0.001
SDI Regions
Low SDI	0.58 (0.55, 0.62)	＜0.001	0.87 (0.79, 0.95)	＜0.001	0.61 (0.57, 0.64)	＜0.001	0.88 (0.80, 0.96)	＜0.001
Low-middle SDI	0.88 (0.82, 0.94)	＜0.001	1.26 (1.12, 1.39)	＜0.001	0.90 (0.85, 0.96)	＜0.001	1.28 (1.15, 1.41)	＜0.001
Middle SDI	1.07 (1.02, 1.12)	＜0.001	1.50 (1.36, 1.62)	＜0.001	1.09 (1.04, 1.14)	＜0.001	1.50 (1.37, 1.62)	＜0.001
High-middle SDI	1.08 (1.01, 1.14)	＜0.001	1.98 (1.79, 2.22)	＜0.001	1.10 (1.03, 1.17)	＜0.001	1.99 (1.80, 2.23)	＜0.001
High SDI	0.28 (0.25, 0.31)	＜0.001	0.35 (0.27, 0.44)	＜0.001	0.28 (0.25, 0.31)	＜0.001	0.33 (0.26, 0.42)	＜0.001
East Asia
China	1.55 (1.44, 1.67)	＜0.001	2.38 (2.01, 2.79)	＜0.001	1.57 (1.46, 1.69)	＜0.001	2.39 (2.02, 2.80)	＜0.001
Central Asia
Armenia	-0.02 (-0.02, -0.02)	＜0.001	-0.01 (-0.02, -0.01)	＜0.001	-0.02 (-0.02, -0.02)	＜0.001	-0.04 (-0.05, -0.04)	＜0.001
Azerbaijan	-0.03 (-0.03, -0.03)	＜0.001	-0.01 (-0.01, -0.01)	＜0.001	-0.04 (-0.04, -0.04)	＜0.001	-0.04 (-0.04, -0.04)	＜0.001
Georgia	-0.30 (-0.32, -0.27)	＜0.001	0.66 (0.60, 0.72)	＜0.001	-0.31 (-0.33, -0.28)	＜0.001	0.63 (0.57, 0.70)	＜0.001
Kazakhstan	0.00 (-0.02, 0.01)	0.615	0.66 (0.62, 0.71)	＜0.001	-0.02 (-0.03, 0.00)	0.068	0.66 (0.61, 0.71)	＜0.001
Kyrgyzstan	-0.02 (-0.02, -0.02)	＜0.001	0.02 (0.01, 0.03)	0.006	-0.01 (-0.02, -0.01)	＜0.001	0.00 (-0.01, 0.01)	0.303
Mongolia	0.00 (-0.01, 0.00)	0.117	0.02 (0.01, 0.03)	0.004	-0.01 (-0.01, -0.01)	＜0.001	0.00 (-0.01, 0.01)	0.917
Tajikistan	-0.03 (-0.03, -0.03)	＜0.001	0.00 (-0.01, 0.02)	0.517	-0.03 (-0.04, -0.03)	＜0.001	-0.02 (-0.03, 0.00)	0.012
Turkmenistan	-0.02 (-0.02, -0.02)	＜0.001	0.00 (-0.01, 0.01)	0.794	-0.02 (-0.02, -0.02)	＜0.001	-0.02 (-0.02, -0.01)	＜0.001
Uzbekistan	-0.03 (-0.03, -0.03)	＜0.001	-0.01 (-0.02, 0.00)	0.003	-0.04 (-0.04, -0.04)	＜0.001	-0.02 (-0.03, -0.02)	＜0.001
South Asia
Bangladesh	0.06 (0.02, 0.10)	0.006	1.56 (1.44, 1.68)	＜0.001	0.07 (0.02, 0.11)	0.004	1.60 (1.46, 1.72)	＜0.001
Bhutan	-0.04 (-0.05, -0.04)	＜0.001	-0.02 (-0.04, -0.01)	0.004	-0.04 (-0.04, -0.03)	＜0.001	-0.02 (-0.04, -0.01)	0.001
India	1.62 (1.54, 1.71)	＜0.001	1.89 (1.68, 2.09)	＜0.001	1.67 (1.59, 1.76)	＜0.001	1.93 (1.71, 2.13)	＜0.001
Nepal	0.91 (0.81, 1.01)	＜0.001	2.11 (1.85, 2.33)	＜0.001	0.93 (0.83, 1.03)	＜0.001	2.14 (1.88, 2.37)	＜0.001
Pakistan	0.05 (0.02, 0.08)	0.003	1.21 (1.11, 1.29)	＜0.001	0.04 (0.01, 0.08)	0.013	1.24 (1.13, 1.33)	＜0.001
Southeast Asia
Cambodia	-0.03 (-0.03, -0.03)	＜0.001	-0.05 (-0.06, -0.05)	＜0.001	-0.03 (-0.03, -0.02)	＜0.001	-0.07 (-0.09, -0.06)	＜0.001
Indonesia	0.38 (0.37, 0.40)	＜0.001	0.87 (0.82, 0.93)	＜0.001	0.39 (0.37, 0.40)	＜0.001	0.87 (0.81, 0.93)	＜0.001
Lao People's Democratic Republic	-0.02 (-0.03, -0.01)	＜0.001	0.34 (0.31, 0.37)	＜0.001	-0.01 (-0.02, 0.00)	0.026	0.37 (0.34, 0.40)	＜0.001
Malaysia	-0.02 (-0.04, 0.00)	0.056	0.79 (0.73, 0.85)	＜0.001	-0.02 (-0.04, 0.00)	0.041	0.79 (0.73, 0.85)	＜0.001
Maldives	-0.06 (-0.06, -0.06)	＜0.001	-0.10 (-0.11, -0.10)	＜0.001	-0.05 (-0.06, -0.05)	＜0.001	-0.13 (-0.14, -0.12)	＜0.001
Myanmar	0.00 (-0.01, 0.01)	0.866	0.49 (0.44, 0.52)	＜0.001	0.00 (-0.01, 0.02)	0.728	0.52 (0.47, 0.55)	＜0.001
Philippines	0.00 (0.00, 0.01)	0.643	0.23 (0.21, 0.25)	＜0.001	0.01 (0.00, 0.02)	0.001	0.20 (0.18, 0.21)	＜0.001
Sri Lanka	0.03 (0.02, 0.05)	＜0.001	0.43 (0.40, 0.46)	＜0.001	0.01 (0.00, 0.02)	0.052	0.43 (0.40, 0.46)	＜0.001
Thailand	-0.01 (-0.02, -0.01)	＜0.001	-0.01 (-0.02, 0.00)	0.143	0.00 (-0.01, 0.00)	0.036	-0.03 (-0.04, -0.01)	0.001
Viet Nam	-0.04 (-0.06, -0.03)	＜0.001	0.44 (0.38, 0.48)	＜0.001	-0.04 (-0.06, -0.02)	＜0.001	0.45 (0.40, 0.49)	＜0.001
High-income Asia pacific
Brunei Darussalam	0.01 (0.00, 0.02)	0.101	0.01 (0.00, 0.02)	0.101	-0.01 (-0.03, 0.01)	0.143	-0.06 (-0.12, -0.01)	0.021
Singapore	-0.02 (-0.04, -0.02)	＜0.001	0.02 (-0.02, 0.05)	0.219	-0.02 (-0.03, -0.01)	0.012	0.02 (-0.03, 0.05)	0.191
North Africa and Middle East
Afghanistan	0.01 (0.00, 0.01)	0.001	-0.05 (-0.05, -0.04)	＜0.001	-0.03 (-0.04, -0.03)	＜0.001	-0.10 (-0.11, -0.08)	＜0.001
Bahrain	-0.05 (-0.05, -0.05)	＜0.001	-0.05 (-0.06, -0.05)	＜0.001	-0.08 (-0.08, -0.07)	＜0.001	-0.08 (-0.09, -0.07)	＜0.001
Egypt	0.38 (0.37, 0.40)	＜0.001	0.94 (0.88, 0.99)	＜0.001	0.38 (0.36, 0.39)	＜0.001	0.92 (0.86, 0.97)	＜0.001
Iran (Islamic Republic of)	0.29 (0.28, 0.30)	＜0.001	0.58 (0.54, 0.61)	＜0.001	0.28 (0.27, 0.29)	＜0.001	0.55 (0.51, 0.58)	＜0.001
Iraq	-0.02 (-0.02, -0.02)	＜0.001	0.00 (0.00, 0.01)	0.036	-0.05 (-0.05, -0.05)	＜0.001	-0.05 (-0.06, -0.05)	＜0.001
Jordan	-0.03 (-0.03, -0.02)	＜0.001	-0.04 (-0.05, -0.03)	＜0.001	-0.04 (-0.04, -0.04)	＜0.001	-0.07 (-0.08, -0.06)	＜0.001
Kuwait	0.03 (0.03, 0.04)	＜0.001	0.09 (0.08, 0.10)	＜0.001	0.01 (0.00, 0.01)	＜0.001	0.05 (0.05, 0.06)	＜0.001
Lebanon	0.40 (0.38, 0.41)	＜0.001	0.91 (0.84, 0.96)	＜0.001	0.38 (0.36, 0.39)	＜0.001	0.87 (0.81, 0.93)	＜0.001
Oman	-0.04 (-0.05, -0.04)	＜0.001	-0.04 (-0.05, -0.03)	＜0.001	-0.04 (-0.05, -0.04)	＜0.001	-0.06 (-0.07, -0.05)	＜0.001
Palestine	-0.05 (-0.06, -0.05)	＜0.001	-0.06 (-0.07, -0.05)	＜0.001	-0.07 (-0.08, -0.07)	＜0.001	-0.10 (-0.10, -0.09)	＜0.001
Qatar	-0.01 (-0.01, -0.01)	＜0.001	0.07 (0.07, 0.08)	＜0.001	-0.04 (-0.04, -0.03)	＜0.001	0.04 (0.03, 0.05)	＜0.001
Saudi Arabia	-0.03 (-0.03, -0.02)	＜0.001	-0.07 (-0.09, -0.05)	＜0.001	-0.04 (-0.04, -0.03)	＜0.001	-0.09 (-0.10, -0.07)	＜0.001
Syrian Arab Republic	0.35 (0.34, 0.36)	＜0.001	0.90 (0.85, 0.95)	＜0.001	0.35 (0.33, 0.36)	＜0.001	0.89 (0.83, 0.93)	＜0.001
Türkiye	0.60 (0.58, 0.62)	＜0.001	0.83 (0.77, 0.88)	＜0.001	0.60 (0.58, 0.62)	＜0.001	0.82 (0.75, 0.87)	＜0.001
United Arab Emirates	-0.20 (-0.21, -0.18)	＜0.001	0.35 (0.31, 0.39)	＜0.001	-0.20 (-0.21, -0.18)	＜0.001	0.38 (0.33, 0.42)	＜0.001
Yemen	-0.03 (-0.03, -0.02)	＜0.001	0.02 (0.02, 0.03)	＜0.001	-0.03 (-0.03, -0.03)	＜0.001	0.01 (0.00, 0.01)	0.014
Central Europe
Albania	-0.02 (-0.02, -0.01)	＜0.001	0.02 (0.02, 0.03)	＜0.001	-0.01 (-0.01, -0.01)	＜0.001	0.01 (0.00, 0.01)	0.032
Bosnia and Herzegovina	-0.02 (-0.02, -0.01)	＜0.001	0.35 (0.33, 0.37)	＜0.001	-0.03 (-0.03, -0.02)	＜0.001	0.33 (0.30, 0.34)	＜0.001
Bulgaria	-0.01 (-0.02, -0.01)	＜0.001	-0.02 (-0.04, -0.01)	0.008	-0.01 (-0.02, 0.00)	0.003	-0.04 (-0.06, -0.03)	＜0.001
Croatia	-0.06 (-0.08, -0.04)	＜0.001	0.70 (0.63, 0.77)	＜0.001	-0.06 (-0.08, -0.04)	＜0.001	0.69 (0.62, 0.75)	＜0.001
Czechia	-0.04 (-0.05, -0.03)	＜0.001	0.25 (0.21, 0.28)	＜0.001	-0.03 (-0.04, -0.02)	＜0.001	0.27 (0.24, 0.30)	＜0.001
Hungary	0.00 (-0.02, 0.02)	0.740	0.86 (0.79, 0.91)	＜0.001	0.03 (0.01, 0.05)	0.018	0.87 (0.80, 0.93)	＜0.001
Montenegro	-0.03 (-0.03, -0.03)	＜0.001	-0.02 (-0.03, -0.02)	＜0.001	-0.04 (-0.04, -0.03)	＜0.001	-0.04 (-0.05, -0.04)	＜0.001
North Macedonia	-0.02 (-0.02, -0.02)	＜0.001	0.00 (0.00, 0.01)	0.116	-0.03 (-0.03, -0.03)	＜0.001	-0.02 (-0.03, -0.02)	＜0.001
Poland	-0.03 (-0.04, -0.03)	＜0.001	-0.02 (-0.04, -0.01)	＜0.001	-0.02 (-0.02, -0.02)	＜0.001	-0.04 (-0.06, -0.03)	＜0.001
Romania	-0.02 (-0.02, -0.01)	＜0.001	-0.04 (-0.05, -0.03)	＜0.001	-0.01 (-0.02, 0.00)	0.034	-0.05 (-0.08, -0.03)	＜0.001
Serbia	-0.02 (-0.03, -0.02)	＜0.001	0.00 (-0.01, 0.00)	0.192	-0.03 (-0.03, -0.03)	＜0.001	-0.02 (-0.03, -0.02)	＜0.001
Slovakia	-0.23 (-0.25, -0.21)	＜0.001	0.41 (0.36, 0.46)	＜0.001	-0.22 (-0.24, -0.20)	＜0.001	0.44 (0.38, 0.49)	＜0.001
Slovenia	0.03 (0.02, 0.04)	＜0.001	0.55 (0.51, 0.58)	＜0.001	0.04 (0.03, 0.05)	＜0.001	0.58 (0.54, 0.61)	＜0.001
Eastern Europe
Belarus	-0.01 (-0.01, -0.01)	＜0.001	-0.01 (-0.01, -0.01)	＜0.001	-0.01 (-0.01, -0.01)	＜0.001	-0.01 (-0.02, -0.01)	＜0.001
Estonia	-0.02 (-0.04, 0.00)	0.047	0.72 (0.67, 0.78)	＜0.001	-0.01 (-0.03, 0.01)	0.294	0.71 (0.66, 0.77)	＜0.001
Latvia	0.02 (0.01, 0.04)	0.007	0.67 (0.62, 0.71)	＜0.001	0.03 (0.01, 0.04)	0.001	0.61 (0.56, 0.65)	＜0.001
Lithuania	-0.02 (-0.02, -0.02)	＜0.001	-0.01 (-0.01, -0.01)	＜0.001	-0.02 (-0.02, -0.02)	＜0.001	0.00 (-0.01, 0.00)	0.154
Republic of Moldova	0.00 (0.00, 0.00)	0.002	-0.02 (-0.02, -0.01)	＜0.001	0.00 (0.00, 0.01)	0.042	-0.03 (-0.04, -0.02)	＜0.001
Russian Federation	0.84 (0.76, 0.91)	＜0.001	2.12 (1.90, 2.31)	＜0.001	0.85 (0.77, 0.93)	＜0.001	2.15 (1.93, 2.35)	＜0.001
Ukraine	-0.01 (-0.03, 0.00)	0.012	0.43 (0.39, 0.46)	＜0.001	-0.01 (-0.02, 0.00)	0.138	0.44 (0.41, 0.47)	＜0.001
Western Europe
Cyprus	-0.04 (-0.04, -0.03)	＜0.001	-0.05 (-0.07, -0.03)	＜0.001	-0.03 (-0.03, -0.02)	＜0.001	-0.03 (-0.05, -0.01)	0.002
Greece	0.00 (0.00, 0.01)	0.095	0.05 (0.03, 0.05)	＜0.001	0.01 (0.00, 0.01)	0.026	0.05 (0.03, 0.06)	＜0.001
Israel	-0.02 (-0.02, -0.02)	＜0.001	-0.03 (-0.03, -0.02)	＜0.001	-0.02 (-0.02, -0.02)	＜0.001	-0.01 (-0.02, -0.01)	＜0.001
