# Supplementary material for: Age, Gender, and Socio-demographic Disparities in Near Vision Loss: A Global Burden of Disease Study Focusing on Belt and Road Countries
Source: Research Square preprint supplement (doi:10.21203/rs.3.rs-6582843/v1), 2025-06-09
Supplement: Supplementary file 4 [file 30ee48b4230eb77cdc68afe1.xlsx]

## Sheet: ASR YLDs
	AAPC from 1990 to 2021 in male			AAPC from 1990 to 2021 in female			AAPC from 1990 to 2021 in both genders
Global/Regions/Countries	AAPC 95%CI	P-Value		AAPC 95%CI	P-Value		AAPC 95%CI	P-Value
Global	1.55(1.37,1.73)	0		1.46(1.30,1.62)	0		1.50(1.33,1.67)	0
SDI Regions
Low SDI	1.14(0.97,1.31)	0		0.96(0.81,1.11)	0		1.05(0.89,1.20)	0
Low-middle SDI	1.65(1.38,1.93)	0		1.38(1.16,1.61)	0		1.52(1.27,1.76)	0
Middle SDI	1.57(1.38,1.78)	0		1.47(1.29,1.64)	0		1.52(1.34,1.71)	0
High-middle SDI	1.52(1.33,1.71)	0		1.41(1.21,1.61)	0		1.44(1.25,1.63)	0
High SDI	0.53(0.45,0.62)	0		0.48(0.40,0.55)	0		0.48(0.40,0.56)	0
East Asia
China	1.79(1.56,2.03)	0		1.75(1.53,1.98)	0		1.77(1.54,2.01)	0
Central Asia
Armenia	0.01(0.00,0.02)	0.167566		-0.02(-0.03,-0.01)	0		-0.02(-0.02,-0.02)	0
Azerbaijan	0.00(-0.01,0.01)	0.705859		-0.03(-0.03,-0.02)	0		-0.04(-0.04,-0.03)	0
Georgia	0.19(-0.05,0.42)	0.111578		0.06(-0.13,0.26)	0.509898		0.09(-0.11,0.30)	0.361928
Kazakhstan	0.18(0.02,0.33)	0.022396		0.27(0.05,0.49)	0.017596		0.21(0.02,0.40)	0.029194
Kyrgyzstan	0.01(0.00,0.02)	0.031994		0.00(0.00,0.01)	0.4995		-0.01(-0.02,-0.01)	0
Mongolia	-0.02(-0.03,-0.01)	0.002799		-0.01(-0.01,0.00)	0.174365		-0.01(-0.02,0.00)	0.0016
Tajikistan	0.00(-0.02,0.01)	0.389122		0.00(-0.01,0.00)	0.333133		-0.04(-0.04,-0.03)	0
Turkmenistan	-0.01(-0.02,-0.01)	0		-0.01(-0.01,0.00)	0.047191		-0.02(-0.03,-0.02)	0
Uzbekistan	-0.02(-0.02,-0.02)	0		-0.03(-0.03,-0.02)	0		-0.05(-0.05,-0.04)	0
South Asia
Bangladesh	0.51(0.11,0.91)	0.012797		0.53(0.10,0.96)	0.013997		0.64(0.20,1.07)	0.006799
Bhutan	-0.02(-0.03,0.00)	0.004799		-0.02(-0.03,-0.01)	0		-0.02(-0.04,-0.01)	0.002799
India	2.87(2.40,3.35)	0		2.49(2.06,2.94)	0		2.68(2.23,3.14)	0
Nepal	2.25(1.81,2.70)	0		2.33(1.83,2.84)	0		2.31(1.84,2.78)	0
Pakistan	0.52(0.13,0.91)	0.010398		0.37(0.08,0.65)	0.011998		0.45(0.12,0.79)	0.009198
Southeast Asia
Cambodia	-0.02(-0.03,-0.01)	0		-0.01(-0.02,0.00)	0.193961		-0.02(-0.03,-0.01)	0
Indonesia	0.48(0.32,0.63)	0		0.45(0.30,0.60)	0		0.46(0.31,0.61)	0
Lao People's Democratic Republic	0.14(0.02,0.26)	0.023595		0.10(0.00,0.20)	0.061588		0.12(0.01,0.23)	0.032394
Malaysia	0.23(0.04,0.42)	0.017596		0.31(0.06,0.56)	0.014397		0.27(0.05,0.49)	0.013997
Maldives	-0.03(-0.04,-0.02)	0		-0.03(-0.04,-0.03)	0		-0.04(-0.05,-0.03)	0
Myanmar	0.12(0.02,0.22)	0.019996		0.22(0.04,0.39)	0.014397		0.18(0.04,0.32)	0.010798
Philippines	0.07(0.03,0.11)	0.0016		0.09(0.03,0.16)	0.009198		0.08(0.03,0.13)	0.006399
Sri Lanka	0.16(0.03,0.29)	0.015997		0.10(-0.01,0.20)	0.067586		0.17(0.06,0.27)	0.002799
Thailand	0.00(-0.01,0.01)	0.581884		-0.01(-0.02,0.00)	0.065187		0.00(-0.01,0.00)	0.075185
Viet Nam	0.16(0.04,0.29)	0.013597		0.18(0.03,0.34)	0.020396		0.14(0.00,0.28)	0.043591
High-income Asia pacific
Brunei Darussalam	-0.02(-0.04,0.00)	0.103579		0.00(-0.02,0.01)	0.585083		0.00(0.00,0.01)	0.333533
Singapore	-0.01(-0.02,0.00)	0.136373		0.01(0.00,0.02)	0.195561		-0.02(-0.03,-0.02)	0
North Africa and Middle East
Afghanistan	-0.06(-0.06,-0.05)	0		-0.03(-0.04,-0.03)	0		-0.02(-0.03,-0.01)	0
Bahrain	-0.02(-0.03,-0.01)	0		-0.05(-0.06,-0.04)	0		-0.08(-0.09,-0.08)	0
Egypt	0.48(0.31,0.65)	0		0.46(0.29,0.63)	0		0.46(0.28,0.63)	0
Iran (Islamic Republic of)	0.35(0.23,0.48)	0		0.30(0.20,0.40)	0		0.35(0.24,0.47)	0
Iraq	-0.06(-0.06,-0.05)	0		-0.05(-0.05,-0.04)	0		-0.06(-0.06,-0.05)	0
Jordan	-0.02(-0.03,-0.02)	0		-0.03(-0.04,-0.02)	0		-0.05(-0.05,-0.04)	0
Kuwait	-0.04(-0.05,-0.03)	0		-0.04(-0.05,-0.03)	0		0.02(0.00,0.04)	0.027195
Lebanon	0.45(0.29,0.63)	0		0.47(0.30,0.64)	0		0.47(0.30,0.64)	0
Oman	-0.03(-0.03,-0.03)	0		-0.05(-0.05,-0.04)	0		-0.03(-0.04,-0.03)	0
Palestine	-0.04(-0.05,-0.03)	0		-0.05(-0.06,-0.05)	0		-0.08(-0.09,-0.07)	0
Qatar	-0.03(-0.04,-0.02)	0		-0.04(-0.05,-0.03)	0		-0.06(-0.07,-0.05)	0
Saudi Arabia	-0.04(-0.04,-0.03)	0		-0.03(-0.04,-0.02)	0		-0.04(-0.05,-0.03)	0
Syrian Arab Republic	0.44(0.28,0.61)	0		0.34(0.22,0.48)	0		0.41(0.25,0.58)	0
Turkey	0.53(0.40,0.66)	0		0.55(0.41,0.68)	0		0.54(0.40,0.68)	0
United Arab Emirates	0.14(0.03,0.26)	0.017197		0.34(0.03,0.65)	0.030794		0.03(-0.13,0.20)	0.65067
Yemen	-0.02(-0.03,-0.02)	0		-0.03(-0.04,-0.02)	0		-0.03(-0.04,-0.02)	0
Central Europe
Albania	-0.01(-0.02,0.00)	0.126775		-0.02(-0.03,-0.01)	0		-0.02(-0.03,-0.01)	0
Bosnia and Herzegovina	0.07(0.01,0.13)	0.015597		0.10(-0.01,0.20)	0.078784		0.06(-0.02,0.14)	0.130774
Bulgaria	-0.01(-0.01,0.00)	0.156769		-0.02(-0.03,-0.01)	0		-0.01(-0.01,0.00)	0.007199
Croatia	0.31(0.07,0.55)	0.010798		0.18(0.02,0.35)	0.027994		0.22(0.01,0.43)	0.039592
Czechia	0.06(-0.01,0.14)	0.09758		0.14(0.02,0.26)	0.017996		0.07(-0.02,0.16)	0.115977
Hungary	0.38(0.12,0.65)	0.007598		0.24(0.07,0.41)	0.008798		0.31(0.08,0.53)	0.009198
Montenegro	-0.02(-0.03,-0.01)	0.002799		-0.04(-0.04,-0.03)	0		-0.04(-0.04,-0.04)	0
North Macedonia	-0.01(-0.02,0.00)	0.003999		-0.01(-0.02,-0.01)	0		-0.02(-0.03,-0.01)	0
Poland	0.00(-0.01,0.01)	0.565087		-0.01(-0.03,0.00)	0.116777		-0.02(-0.02,-0.01)	0
Romania	0.00(-0.01,0.00)	0.273545		-0.01(-0.02,0.00)	0.027994		-0.01(-0.01,0.00)	0.069186
Serbia	-0.03(-0.04,-0.02)	0		-0.03(-0.04,-0.02)	0		-0.04(-0.05,-0.03)	0
Slovakia	0.04(-0.10,0.18)	0.571486		0.10(-0.05,0.25)	0.194761		0.06(-0.08,0.21)	0.364727
Slovenia	0.16(0.03,0.29)	0.011598		0.18(0.00,0.36)	0.04959		0.20(0.05,0.35)	0.008398
Eastern Europe
Belarus	0.00(-0.01,0.00)	0.320736		0.00(-0.01,0.01)	0.805039		0.00(-0.01,0.00)	0.30234
Estonia	0.20(0.02,0.37)	0.025195		0.33(0.07,0.58)	0.011998		0.25(0.04,0.45)	0.016797
Latvia	0.21(0.08,0.34)	0.003199		0.20(0.04,0.36)	0.012398		0.23(0.08,0.37)	0.004799
Lithuania	-0.01(-0.02,0.00)	0.045191		-0.02(-0.03,-0.02)	0		-0.02(-0.02,-0.01)	0
Republic of Moldova	0.01(0.01,0.02)	0.0016		0.01(0.00,0.02)	0.093581		0.01(0.01,0.01)	0
Russian Federation	2.04(1.54,2.55)	0		1.94(1.47,2.42)	0		1.96(1.46,2.47)	0
Ukraine	0.23(0.08,0.38)	0.005199		0.14(0.02,0.25)	0.023195		0.17(0.03,0.30)	0.013597
Western Europe
Cyprus	-0.03(-0.03,-0.02)	0		0.00(-0.01,0.01)	0.465907		-0.02(-0.03,-0.01)	0
Greece	-0.03(-0.04,-0.01)	0		0.02(0.01,0.02)	0.0008		-0.01(-0.01,0.00)	0.052789
Israel	-0.02(-0.03,-0.01)	0		-0.01(-0.02,0.00)	0.0016		-0.02(-0.03,-0.02)	0
