# Supplementary material for: Age, Gender, and Socio-demographic Disparities in Near Vision Loss: A Global Burden of Disease Study Focusing on Belt and Road Countries
Source: Research Square preprint supplement (doi:10.21203/rs.3.rs-6582843/v1), 2025-06-09
Supplement: Supplementary file 5 [file 49ff6d92143b120fca756b8b.xlsx]

## Sheet: YLDs
	ASR of YLDs in 1990		ASR of YLDs in 2019		ASR of YLDs in 2020		ASR of YLDs in 2021
Gobal/Regions/Countries	Rate	95%UI	Rate	95%UI	Rate	95%UI	Rate	95%UI
Global	98.26	(44.1,191)	132.86	(59.8,256.5)	136.07	(61.08,261.33)	135.52	(60.83,260.39)	0.379198
SDI Regions
Low SDI	126.39	(56.28,247)	151.87	(68.14,289.56)	152.45	(68.54,286.68)	152.07	(67.8,285.87)
Low-middle SDI	123.99	(55.31,239.82)	163.65	(73.42,308.41)	163.15	(73.09,306.69)	162.8	(72.9,306.43)
Middle SDI	111.27	(49.93,215.03)	151.04	(67.96,293.02)	156.59	(70.14,301.58)	155.1	(69.34,297.14)
High-middle SDI	93.46	(41.33,181.13)	120.90	(54.43,230.13)	129.97	(58.62,249.11)	129.04	(58.41,248.04)
High SDI	64.41	(28.77,126.81)	72.20	(32.33,138.49)	70.27	(31.37,135.38)	70.31	(31.41,135.97)
East Asia	102.6	(44.92,199.24)	141.20	(64.43,271.4)	158.8	(71.77,305.21)	157.57	(71.35,300.76)
China	101.75	(44.49,197.41)	141.80	(64.68,272.41)	160.03	(72.16,307.4)	158.75	(71.79,302.72)
Central Asia	88.52	(38.93,167.94)	86.48	(37.98,168.3)	86.58	(37.85,168.07)	86.37	(37.85,167.96)
Armenia	87.67	(38.69,169.63)	87.16	(38.33,169.47)	87.2	(38.26,168.04)	87.06	(38.02,167.8)
Azerbaijan	88.24	(38.48,170.96)	87.47	(38.83,168.6)	87.31	(38.44,169.16)	87.23	(38.12,168.51)
Georgia	101.67	(46.82,188.26)	92.15	(40.94,175.56)	92.28	(40.75,175.64)	91.84	(40.23,179.43)
Kazakhstan	82.64	(36.32,160.66)	82.10	(36.12,163.06)	82.23	(36.65,161.3)	81.8	(35.98,158.38)
Kyrgyzstan	88.32	(39.13,170.91)	87.76	(38.61,170.06)	87.97	(38.64,169.41)	87.85	(38.34,170.43)
Mongolia	87.82	(38.4,170.58)	87.05	(38.31,170.27)	87.42	(38.37,168.83)	87.48	(38.23,168.74)
Tajikistan	88.18	(38.59,172.2)	87.11	(38.85,170.72)	87.39	(38.43,169.27)	87.22	(38.04,169.71)
Turkmenistan	88	(38.86,172.14)	87.52	(38.44,169.81)	87.63	(38.29,170.98)	87.47	(38.09,168.44)
Uzbekistan	88.14	(38.58,171.93)	87.08	(38.5,168.9)	87.16	(38.12,168.73)	87.08	(37.91,170.33)
South Asia	133.16	(59.83,257.04)	209.51	(94.08,381.91)	208.46	(94.14,378.22)	208.01	(94.09,378.41)
Bangladesh	103.67	(46.07,198.41)	105.90	(47.89,204.1)	104.97	(47.27,197.55)	105.78	(46.92,201.87)
Bhutan	129.01	(58.11,251.36)	128.50	(57.24,247.27)	127.77	(57.07,247.42)	127.61	(57.68,246.98)
India	141.26	(63.71,273.11)	235.90	(105.71,432.48)	234.55	(105.36,425.36)	234.04	(105.95,425.59)
Nepal	175.1	(80.63,331.74)	227.08	(104.58,413.33)	235.21	(110.27,429.52)	234.03	(108.51,421.41)
Pakistan	86.39	(37.92,168.03)	87.56	(38.5,173.62)	87	(38.9,170.26)	87.47	(38.38,172.01)
Southeast Asia	98.38	(44.15,190.12)	105.47	(47.37,204.23)	105.8	(47.58,204.73)	105.68	(47.17,204.97)
Cambodia	74.41	(33.68,146.52)	73.90	(33.47,144.05)	74.04	(33.69,143.21)	73.78	(33.62,142.64)
Indonesia	118.67	(53.08,229.47)	133.92	(60.5,257.57)	134.39	(60.71,259.52)	134.2	(60.72,258.91)
Lao People's Democratic Republic	60.31	(27.68,116.63)	60.13	(27.18,116.49)	60.1	(27.13,115.81)	59.94	(27.15,117.01)
Malaysia	40.56	(18.19,79.02)	40.32	(18.34,78.9)	40.29	(18.2,78.05)	40.14	(18.31,78.45)
Maldives	73.18	(32.88,143.31)	72.40	(32.44,142.93)	72.19	(32.65,141.04)	71.95	(32.27,140.3)
Myanmar	49.89	(22.87,97.26)	49.84	(22.55,96.42)	49.85	(22.61,95.55)	49.79	(22.83,95.88)
Philippines	187.68	(84.37,362.72)	188.03	(84,362.86)	188.32	(84.76,361.28)	187.94	(84.12,362.05)
Sri Lanka	82.12	(36.84,162.13)	82.34	(37.43,158.8)	82.24	(37.26,157.95)	82.29	(37.39,159.2)
Thailand	73.42	(33.36,143.55)	73.33	(33.25,144.25)	73.45	(33.32,141.77)	73.2	(32.88,142.09)
Viet Nam	51.09	(23.08,98.6)	50.57	(23.31,97.43)	50.41	(22.99,99.16)	50.34	(22.83,98.39)
High-income Asia pacific	69.25	(30.32,137.02)	68.11	(29.92,136.17)	67.88	(29.9,136.08)	68.15	(29.88,136.03)
Brunei Darussalam	62.75	(27.97,122.08)	62.88	(27.3,120.86)	62.3	(27.6,120.71)	62.54	(27.48,121.12)
Singapore	63.6	(27.86,123.72)	63.17	(27.76,124.27)	62.83	(27.71,124.57)	63.34	(27.61,125.26)
North Africa and Middle East	98.44	(45.04,182)	105.07	(47.1,202.47)	104.8	(47.29,202.37)	104.6	(47.1,201.85)
Afghanistan	101.16	(45.57,196.49)	100.59	(45.54,193.15)	100.52	(44.54,197.77)	100.12	(45.36,194.67)
Bahrain	97.77	(43.52,189.02)	95.84	(42.44,183.15)	95.56	(42.42,183.59)	95.55	(42.43,183.95)
Egypt	101.19	(46.63,186.71)	114.19	(50.67,219.51)	114.19	(51.31,223)	113.89	(50.57,221.19)
Iran (Islamic Republic of)	78.55	(35.85,153.29)	85.91	(38.48,167.38)	85.58	(38.68,166.76)	85.66	(38.44,166.96)
Iraq	100.21	(45.23,194.68)	98.95	(44.1,190.4)	98.73	(44.64,188.42)	98.69	(44.17,189.96)
Jordan	99.47	(44.37,194.6)	98.59	(44.51,189.25)	98.32	(43.09,187.82)	98.23	(43.23,192.02)
Kuwait	96.5	(43.26,186.03)	96.65	(43.22,187.99)	96.73	(43.41,187.77)	96.69	(43.17,187.44)
Lebanon	78.32	(37.17,142.31)	88.94	(40.27,173.27)	88.41	(39.9,170.64)	88.21	(39.98,171.03)
Oman	97.68	(43.95,186.98)	96.48	(42.9,186.17)	96.25	(43.24,184.2)	96.41	(42.56,184.44)
Palestine	101.96	(46.36,196.47)	99.79	(44.28,194.47)	99.65	(45.2,192.95)	99.63	(45.26,193.51)
Qatar	93.66	(41.42,181.44)	92.50	(41.48,178.36)	92.54	(41.77,178.68)	92.62	(41.41,176.95)
Saudi Arabia	96.46	(43.08,188.03)	95.53	(42.11,183.89)	95.69	(42.53,186.81)	95.25	(42.74,184.05)
Syrian Arab Republic	71.58	(32.98,130.96)	80.11	(35.91,157.23)	79.68	(35.41,155.38)	79.78	(35.81,156.37)
Türkiye	100.41	(46.1,188.29)	121.92	(54.44,233.53)	121.5	(54.61,232.31)	121.28	(55.18,229.26)
United Arab Emirates	90.52	(41.21,176.72)	85.40	(38.18,164.86)	85.31	(38.51,166.58)	85.02	(38.33,164.71)
Yemen	101.13	(46.07,196.81)	100.35	(44.62,198.22)	100.4	(44.86,192.72)	100.27	(44.94,196.09)
Central Europe	60.79	(27.11,119.39)	60.67	(26.75,120.25)	60.47	(26.9,119.78)	60.57	(26.91,118.93)
Albania	59.62	(26.42,118.36)	59.34	(26.11,117.06)	59.39	(26.56,116.84)	59.4	(26.32,116.82)
Bosnia and Herzegovina	113.2	(50.47,218.65)	112.34	(50.57,217.41)	112.07	(50.62,218.5)	112.37	(50.1,221.2)
Bulgaria	59.31	(26.54,117.04)	59.34	(26.12,117.6)	59.1	(26.48,117.27)	59.18	(26.46,115.64)
Croatia	52.85	(23.54,104.03)	51.67	(22.84,100.99)	51.85	(22.78,102.53)	51.69	(23.47,100.33)
Czechia	50.58	(22.53,99.7)	50.00	(22.35,98.58)	49.86	(22.23,98.48)	50.08	(22.25,98.36)
Hungary	46.51	(21,91.88)	46.96	(21.19,92.27)	46.65	(20.84,92.41)	46.81	(21.22,92.64)
Montenegro	59.57	(26.4,117.41)	59.12	(26.16,116.09)	59.02	(25.87,116.74)	58.92	(25.9,116.27)
North Macedonia	59.4	(26.24,114.59)	59.12	(26.32,116.47)	59.02	(26.38,114.64)	58.8	(26.37,115.06)
Poland	67.03	(30.08,131.64)	66.79	(29.38,132.92)	66.61	(29.57,132.21)	66.74	(29.64,130.48)
Romania	59.49	(26.4,116.41)	59.53	(26.09,117.73)	59.22	(26.56,117.58)	59.37	(26.62,116.27)
Serbia	59.54	(26.42,117.72)	59.22	(26.4,116.94)	59.07	(26.06,117.43)	59.03	(26.27,116.38)
Slovakia	47.09	(21.38,88.93)	43.93	(19.47,85.56)	43.85	(19.33,85.46)	43.94	(19.93,86.63)
Slovenia	70.42	(31.4,137.75)	71.27	(31.56,142.97)	71.44	(31.43,140.35)	71.23	(31.52,138.88)
Eastern Europe	111.09	(49.79,216.54)	138.37	(62.8,262.5)	138.5	(62.77,263.31)	136.4	(62.55,260.55)
Belarus	81.2	(36.62,156.69)	81.21	(35.82,157.41)	81.03	(36.34,157.05)	80.91	(35.73,156.61)
Estonia	59.14	(26.65,115.31)	58.55	(26.25,112.35)	58.69	(26.48,113.77)	58.87	(26.19,114.75)
Latvia	89.67	(39.76,174.51)	90.44	(40.4,176.15)	90.62	(41.43,177.16)	90.08	(40.5,174.03)
Lithuania	81.1	(35.94,157.74)	80.72	(36.29,156.42)	80.64	(35.63,156.85)	80.53	(35.8,156.62)
Republic of Moldova	81.12	(36.26,157.68)	81.47	(36.03,155.21)	81.24	(36.71,157.09)	81.24	(35.91,158.89)
Russian Federation	127.87	(57.77,249.06)	165.16	(75.38,311.75)	165.37	(75.18,314.88)	162.34	(74.88,311.86)
Ukraine	79.01	(34.85,155.1)	78.84	(35.54,153.81)	78.72	(35.03,154.04)	78.61	(35.06,154.18)
Western Europe	60.1	(27.03,118.15)	59.26	(26.58,116.93)	59.28	(26.84,116.72)	59.38	(26.74,116.79)
Cyprus	57.59	(25.63,113.06)	57.20	(25.61,113.33)	56.98	(26.35,111.56)	57.09	(25.74,112.49)
Greece	57.39	(26.3,112.2)	57.29	(25.77,112.27)	57.31	(26.31,114.46)	57.54	(25.85,112.93)
Israel	57.7	(25.64,114.94)	57.34	(25.91,113.63)	57.36	(26.1,113.93)	57.32	(25.71,111.67)

## Sheet: regional level
	ASR of YLDs in 1990		ASR of YLDs in 2019		ASR of YLDs in 2020		ASR of YLDs in 2021
East Asia	102.6	(44.92,199.24)	141.20	(64.43,271.4)	158.8	(71.77,305.21)	157.57	(71.35,300.76)
Central Asia	88.52	(38.93,167.94)	86.48	(37.98,168.3)	86.58	(37.85,168.07)	86.37	(37.85,167.96)
South Asia	133.16	(59.83,257.04)	209.51	(94.08,381.91)	208.46	(94.14,378.22)	208.01	(94.09,378.41)
Southeast Asia	98.38	(44.15,190.12)	105.47	(47.37,204.23)	105.8	(47.58,204.73)	105.68	(47.17,204.97)
High-income Asia pacific	69.25	(30.32,137.02)	68.11	(29.92,136.17)	67.88	(29.9,136.08)	68.15	(29.88,136.03)
North Africa and Middle East	98.44	(45.04,182)	105.07	(47.1,202.47)	104.8	(47.29,202.37)	104.6	(47.1,201.85)
Central Europe	60.79	(27.11,119.39)	60.67	(26.75,120.25)	60.47	(26.9,119.78)	60.57	(26.91,118.93)
Eastern Europe	111.09	(49.79,216.54)	138.37	(62.8,262.5)	138.5	(62.77,263.31)	136.4	(62.55,260.55)
Western Europe	60.1	(27.03,118.15)	59.26	(26.58,116.93)	59.28	(26.84,116.72)	59.38	(26.74,116.79)
