# Supplementary material for: Age, Gender, and Socio-demographic Disparities in Near Vision Loss: A Global Burden of Disease Study Focusing on Belt and Road Countries
Source: Research Square preprint supplement (doi:10.21203/rs.3.rs-6582843/v1), 2025-06-09
Supplement: Supplementary file 6 [file 52abd05f46b5f5530bb6ec0f.xlsx]

## Sheet: Sheet1
	YLDs in 1990			YLDs in 2019			YLDs in 2020			YLDs in 2021			Prevalence in 1990			Prevalence in 2019			Prevalence in 2020			Prevalence in 2021
Gobal/Regions/Countries	Number	95%UI		Number	95%UI		Number	95%UI		Number	95%UI		Number	95%UI		Number	95%UI		Number	95%UI		Number	95%UI
Global	4.3161e+06	1937301.63 to 8410039.69		1.10189e+07	4951744.60 to 21171550.45		1.15008e+07	5152226.54 to 22131855.80		1.16501e+07	5214587.57 to 22421434.37	1.69922	4.27938e+08	322776201.96 to 561645080.04		1.09079e+09	823314202.09 to 1421140012.79		1.13959e+09	862906549.92 to 1485309044.64		1.15506e+09	875226145.90 to 1514597489.37	1.69914
SDI Regions
Low SDI	373189	165522.11 to 727911.13		1.00469e+06	449454.14 to 1927828.97		1.03233e+06	458900.58 to 1945418.81		1.05906e+06	468514.91 to 1992502.63		3.70466e+07	27880465.61 to 49056856.53								1.04596e+08	79346300.03 to 136002120.64
Low-middle SDI	927813	419504.87 to 1820599.04		2.61689e+06	1167037.71 to 4995932.67		2.65148e+06	1186774.44 to 5025440.61		2.70416e+06	1209222.45 to 5151281.90		9.22369e+07	68939826.73 to 122669436.78								2.68439e+08	202599984.02 to 348791237.96
Middle SDI	1.38704e+06	616278.55 to 2687730.05		4.05946e+06	1825100.83 to 7824958.12		4.29897e+06	1926253.36 to 8245714.85		4.34434e+06	1940645.26 to 8348789.65		1.36883e+08	103329965.06 to 177666072.72								4.2984e+08	322949503.74 to 565578250.53
High-middle SDI	965506	424643.91 to 1874459.41		2.17351e+06	983244.84 to 4119808.72		2.36966e+06	1073890.26 to 4488873.97		2.38305e+06	1087762.26 to 4528133.20		9.5902e+07	72245029.18 to 126357813.91								2.36296e+08	175829654.00 to 310139117.83
High SDI	658924	297991.42 to 1297086.87		1.15828e+06	519988.35 to 2203629.04		1.14219e+06	516671.22 to 2182314.18		1.15321e+06	521891.70 to 2212974.70		6.55074e+07	47979250.18 to 87725743.85								1.15267e+08	85334195.27 to 152976369.78
