# Supplementary material for: Age, Gender, and Socio-demographic Disparities in Near Vision Loss: A Global Burden of Disease Study Focusing on Belt and Road Countries
Source: Research Square preprint supplement (doi:10.21203/rs.3.rs-6582843/v1), 2025-06-09
Supplement: Supplementary file 8 [file 934ce58a36548f9a3b06aa44.xlsx]

## Sheet: Prevalence
	ASR of prevalence in 1990		ASR of prevalence in 2019		ASR of prevalence in 2020		ASR of prevalence in 2021
Gobal/Regions/Countries	Rate	95%UI	Rate	95%UI	Rate	95%UI	Rate	95%UI
Global	9788.66	(7371.64,12888.27)	13157.1	(17190.03,9949.15)	13484.9	(17565.14,10282.08)	13436.2	(10223.45,17585.84)	37.2627
SDI Regions
Low SDI	12691.03	(9558.96,16621.86)	NA	NA	NA	NA	15178.1	(11707.32,19284.76)
Low-middle SDI	12448.64	(9373.22,16427.89)	NA	NA	NA	NA	16252.9	(12370.25,20760.61)
Middle SDI	11085.31	(8446.41,14432.87)	NA	NA	NA	NA	15372.7	(11707.71,20094.48)
High-middle SDI	9312.15	(7060.47,12156.86)	NA	NA	NA	NA	12764	(9620.8,16797.59)
High SDI	6386.77	(4701.06,8555.87)	NA	NA	NA	NA	6970.86	(5146.04,9289.42)
East Asia	10176.85	(7736.21,13337.14)	13913.7	(18287.99,10379.21)	15638.4	(20582.36,11698.84)	15509.3	(11531.38,20444.81)
China	10096.24	(7684.27,13228.36)	13972.2	(18358.3,10419.52)	15758.9	(20752.2,11790.88)	15624.5	(11615.32,20587.84)
Central Asia	8846.17	(6771.48,11489.21)	8637.89	(11428.14,6466.3)	8655.91	(11490.13,6508.04)	8642.16	(6442.18,11440.93)
Armenia	8764.15	(6550.05,11698.5)	8696.34	(11404.48,6467.29)	8706.02	(11602.8,6577.77)	8706.43	(6470.79,11531.68)
Azerbaijan	8786.08	(6567.55,11817.27)	8704.72	(11569.98,6576.82)	8703.61	(11538.93,6475.45)	8700.57	(6512.23,11550.58)
Georgia	10150.02	(8480.92,11755.51)	9215.63	(12168.3,6786.31)	9232.31	(12186.77,6911.51)	9203.74	(6855.74,12178.45)
Kazakhstan	8297.46	(6236.56,11037.24)	8242.06	(10970.86,6166.71)	8261.15	(10955.52,6152.27)	8225.45	(6106.51,10871.02)
Kyrgyzstan	8826.42	(6630.74,11722.36)	8737.26	(11632.04,6504)	8768.15	(11735.58,6665.78)	8764.76	(6579.43,11704.81)
Mongolia	8777.64	(6531.69,11647.62)	8703.11	(11543.49,6407.24)	8744.01	(11575.73,6594.59)	8761.96	(6498.49,11652.8)
Tajikistan	8785.86	(6529.86,11661.33)	8664.84	(11490.51,6403.4)	8699.4	(11531.48,6524.39)	8695.92	(6515.29,11607.53)
Turkmenistan	8774.92	(6524.83,11676.67)	8708.12	(11539.75,6517.78)	8726.49	(11689.12,6558.18)	8722.53	(6481.87,11521.25)
Uzbekistan	8794.96	(6583.03,11696.8)	8693.11	(11567.97,6513.09)	8710.55	(11650.19,6512.99)	8703.76	(6453.82,11486.23)
South Asia	13421.72	(9893.51,17947.39)	20822.2	(27199.92,15620.39)	20772.8	(26735.52,15638.46)	20747	(15692.17,26642.32)
Bangladesh	10370.11	(7581.22,14029.77)	10555.3	(14536.21,7662.23)	10468	(14254.28,7630.1)	10560.2	(7733.46,14181.38)
Bhutan	12837.22	(9409.24,17427.01)	12764	(17210.44,9281.48)	12697.8	(17286.87,9189.7)	12685.6	(9236.3,17184.36)
India	14264.44	(10530.66,18991.83)	23427	(30672.04,17438.64)	23361.5	(30175.43,17580.57)	23331.1	(17691.58,30047.11)
Nepal	17545.26	(13011.57,23268.33)	22619.6	(25466.94,19209.69)	23398.5	(27028.11,18971.86)	23298.1	(18805.5,27323.64)
Pakistan	8635.41	(6262.35,11931.25)	8769.99	(12200.56,6347.73)	8718.45	(11998.56,6288.33)	8767.92	(6385.04,12183.89)
Southeast Asia	9797.28	(7367.85,12768.65)	10472	(13660.61,7933.26)	10507.9	(13756.01,7937.32)	10504	(7965.77,13743.2)
Cambodia	7475.97	(5581.58,9941.65)	7408.95	(9867.37,5450.95)	7422.53	(9817.37,5444.82)	7405.37	(5517.97,9868.27)
Indonesia	11814.07	(8791.72,15288.22)	13298.3	(17421.67,9982.67)	13348.2	(17374.88,9949.95)	13341.8	(10058.71,17298.19)
Lao People's Democratic Republic	6023.45	(4483.64,8082.79)	5987.5	(7918.99,4474.06)	5990.51	(8034.69,4479.87)	5976.23	(4426.57,7867.16)
Malaysia	4065.44	(3019.51,5389.6)	4042.85	(5459.86,3033.39)	4036.94	(5444.49,2995.71)	4025.43	(2982.83,5390.43)
Maldives	7304.94	(5459.36,9750.89)	7210.43	(9675.77,5386.08)	7192.37	(9569.5,5366.53)	7175.27	(5391.57,9507.52)
Myanmar	5008.19	(3704.9,6724.31)	4995.8	(6697.87,3692.15)	4997.46	(6629.71,3730.31)	4992.81	(3700.69,6730.88)
Philippines	18646.60	(14183.5,24315.79)	18614.6	(24138.99,14209.55)	18644.4	(24201.88,14185.74)	18622	(14257.6,24077.55)
Sri Lanka	8221.49	(6162.24,10914.46)	8273.42	(10912.72,6169.88)	8272.13	(10807.92,6216.69)	8281.6	(6193.65,10911.19)
Thailand	7348.65	(5438.96,9768.76)	7318.57	(9701.29,5407.49)	7330.18	(9808.79,5428.92)	7311.18	(5377.91,9692.18)
Viet Nam	5097.86	(3792.86,6753.05)	5036.14	(6774.98,3731.58)	5022.85	(6782.09,3724.23)	5018.82	(3700.95,6734.49)
High-income Asia pacific	6824.40	(4994.76,9264.42)	6691.7	(9152.47,4878.18)	6675.5	(9116.53,4875.5)	6702.48	(4908.07,9141.57)
Brunei Darussalam	6200.57	(4531.34,8549.3)	6216.05	(8538.21,4530.98)	6162.25	(8551.37,4460.33)	6190.53	(4497.31,8610.33)
Singapore	6248.28	(4521.94,8560.46)	6190.92	(8609.46,4500.1)	6159.64	(8233.07,4489.96)	6209.64	(4510.43,8537.32)
North Africa and Middle East	9840.67	(7682.23,12450.63)	10517.2	(13815.05,7910.31)	10501.5	(13771.89,7915.82)	10490.6	(7901.84,13754.32)
Afghanistan	10166.83	(7698.75,13572.51)	10199.5	(13511.84,7648.85)	10212	(13393.16,7648.56)	10181.2	(7605.11,13325.69)
Bahrain	9779.89	(7361.51,12989.03)	9640.51	(12811.51,7233.25)	9621.25	(12670.13,7185.27)	9628.45	(7236.09,12741.54)
Egypt	10108.05	(8433.63,12094.75)	11394.5	(15061.78,8548.48)	11408.1	(15002.64,8615.66)	11384.6	(8582.55,14923.96)
Iran (Islamic Republic of)	7869.13	(5914.92,10449.87)	8620.86	(11434.66,6406.02)	8596.58	(11271.86,6395.48)	8613.81	(6384.22,11433.06)
Iraq	10042.92	(7458,13248.4)	9975.64	(13108.99,7493.78)	9977.14	(13179.82,7547.08)	9984.67	(7535.23,13126.03)
Jordan	9932.40	(7430.56,13308.74)	9873.22	(13068.03,7401.35)	9858.25	(13033.07,7421.18)	9858.23	(7412.35,13060.55)
Kuwait	9608.93	(7245.41,12668.39)	9682.38	(12738.31,7249.23)	9704.94	(12786.75,7228.45)	9702.66	(7186.82,12767.24)
Lebanon	7854.42	(6547.53,9418.16)	8947.87	(11951.46,6663.04)	8902.5	(11819.8,6683.62)	8899.34	(6705.89,11748.03)
Oman	9792.25	(7354.8,12943.85)	9656.14	(12722.57,7282.44)	9648.34	(12762.76,7261.47)	9670.17	(7261.79,12768.4)
Palestine	10176.36	(7576.8,13385.63)	10005.2	(13269.46,7509.64)	9994.99	(13185.05,7512.13)	10019.4	(7486.91,13361.97)
Qatar	9372.18	(7039.32,12417.91)	9302.76	(12304.89,6964.56)	9326.94	(12325.53,6989.05)	9336.41	(6929.82,12343.69)
Saudi Arabia	9696.63	(7237.36,12991.5)	9618.44	(12711.51,7226.13)	9646.36	(12814.98,7190.37)	9603.58	(7168.55,12773.89)
Syrian Arab Republic	7172.49	(5952.43,8722.65)	8023.21	(10769.55,5977.58)	7989.36	(10687.84,5925.4)	7998.62	(5996.72,10677.14)
Türkiye	10013.59	(7917.02,12729.16)	12144.9	(15903.38,9174.4)	12110.5	(16038.22,9062.16)	12100.1	(9173.67,15841.29)
United Arab Emirates	9071.50	(6853.12,11992.48)	8552.65	(11197.54,6433.94)	8544.41	(11220.92,6447.86)	8521.12	(6414.86,11282.32)
Yemen	10155.15	(7610.64,13358.24)	10070.5	(13419.29,7585.83)	10078.5	(13265.47,7567.84)	10071.6	(7427.71,13293.7)
Central Europe	6114.95	(4529.21,8214.71)	6072.84	(8098.15,4500.39)	6060.04	(8097.3,4494.59)	6077.04	(4523.23,8108.42)
Albania	5958.16	(4363.91,7998.43)	5911.63	(7876.24,4377.3)	5921.17	(7871.49,4382.32)	5930.24	(4410.79,7865.64)
Bosnia and Herzegovina	11318.48	(8426.52,14975.31)	11234.6	(14857.34,8471.74)	11213.4	(14801.82,8436.26)	11258	(8510.57,14853.45)
Bulgaria	5949.05	(4422.42,8031.46)	5934.52	(7966.06,4415.24)	5915.64	(7862.89,4370.62)	5931.8	(4469.53,7860.26)
Croatia	5306.72	(3950.5,6992.83)	5179.25	(6927.59,3827.62)	5202.02	(6897.87,3869.23)	5189.8	(3815.05,6860.04)
Czechia	5100.79	(3761.66,6735.01)	5021.8	(6679.26,3755.4)	5013.65	(6654.75,3730.5)	5042.34	(3778.94,6737.75)
Hungary	4701.86	(3469.96,6335.23)	4706.88	(6343.2,3544.8)	4676.82	(6262.64,3497.87)	4698.93	(3480.13,6197.54)
Montenegro	5953.36	(4452.81,7918.65)	5910.46	(7913.4,4384.96)	5908.16	(7841.75,4360.92)	5906.51	(4309.46,7935.94)
North Macedonia	5952.64	(4418.69,7986.11)	5921.58	(7897.5,4430.07)	5919.44	(7889.37,4425.83)	5909.14	(4398.82,7900.05)
Poland	6769.53	(4971.9,9044.25)	6695.17	(9019.05,4873.18)	6686.98	(8922.29,4899.06)	6709.7	(4918.59,9060.36)
Romania	5965.12	(4442.57,8009.26)	5937.09	(7951.33,4425.6)	5913.66	(7860.22,4364.46)	5930.37	(4469.45,7858.37)
Serbia	5957.57	(4425.18,8040.57)	5922.12	(7839.71,4381.38)	5912.16	(7884.91,4335.96)	5918.83	(4306.88,7907.38)
Slovakia	4741.28	(3667.26,5866.62)	4401.51	(5863.66,3293.64)	4396.6	(5860.04,3257.52)	4410.36	(3210.1,5899.39)
Slovenia	7088.19	(5174.44,9431.09)	7136.65	(9555.54,5228.26)	7160.15	(9600.69,5301.64)	7142.99	(5219.69,9538.72)
Eastern Europe	11145.02	(8336.13,14567.28)	13813.8	(18196.63,10406.74)	13835.1	(18393.9,10404.67)	13644.8	(10228.7,17972.77)
Belarus	8126.39	(6030.3,10886.96)	8122.36	(10868.27,6023.91)	8111.09	(10845.7,5968.93)	8108.22	(6049.05,10972.73)
Estonia	5934.56	(4426.21,8023.95)	5851.31	(7844.53,4348.74)	5867.31	(7947.26,4374.83)	5892.04	(4389.49,7998.44)
Latvia	9002.07	(6754.48,11975.38)	9023.38	(11954.13,6717.13)	9052.75	(12006.31,6744.51)	9008.71	(6743.1,11990.53)
Lithuania	8138.04	(6066.99,10805.27)	8082.45	(10823.55,5972.81)	8081.33	(10801.06,6005.11)	8077.93	(6007.73,10767.06)
Republic of Moldova	8132.50	(6024.47,10835.59)	8130.67	(10956.83,6002.47)	8121.1	(10909.65,6030.42)	8128.43	(6002.56,10931.5)
Russian Federation	12821.80	(9548.26,16814.42)	16475.4	(21929.15,12364.69)	16507.5	(22059.71,12375.21)	16228.8	(12078.26,21445.92)
Ukraine	7955.91	(5834.08,10649.97)	7913.3	(10565.13,5851.43)	7903.54	(10483.57,5918.75)	7904.7	(5884.66,10495.15)
Western Europe	5990.77	(4427.69,8044.53)	5895.98	(7944.16,4346.31)	5902.11	(7917.7,4354.23)	5912.94	(4354.13,7966.79)
Cyprus	5733.13	(4197.89,7752.5)	5679.98	(7643.53,4191.46)	5662.85	(7583.83,4151.18)	5676.28	(4176.17,7637.54)
Greece	5707.42	(4199.3,7708.05)	5688.14	(7704.26,4195.57)	5692.82	(7592.77,4205.54)	5715.44	(4175.52,7710.86)
Israel	5722.34	(4176.44,7693.45)	5690.35	(7733.95,4168.49)	5692.99	(7599.65,4229.07)	5689.75	(4161.34,7633.07)

## Sheet: regional level
	ASR of prevalence in 1990		ASR of prevalence in 2019		ASR of prevalence in 2020		ASR of prevalence in 2021
East Asia	10176.85	(7736.21,13337.14)	13913.7	(18287.99,10379.21)	15638.4	(20582.36,11698.84)	15509.3	(11531.38,20444.81)
Central Asia	8846.17	(6771.48,11489.21)	8637.89	(11428.14,6466.3)	8655.91	(11490.13,6508.04)	8642.16	(6442.18,11440.93)
South Asia	13421.72	(9893.51,17947.39)	20822.2	(27199.92,15620.39)	20772.8	(26735.52,15638.46)	20747	(15692.17,26642.32)
Southeast Asia	9797.28	(7367.85,12768.65)	10472	(13660.61,7933.26)	10507.9	(13756.01,7937.32)	10504	(7965.77,13743.2)
High-income Asia pacific	6824.40	(4994.76,9264.42)	6691.7	(9152.47,4878.18)	6675.5	(9116.53,4875.5)	6702.48	(4908.07,9141.57)
North Africa and Middle East	9840.67	(7682.23,12450.63)	10517.2	(13815.05,7910.31)	10501.5	(13771.89,7915.82)	10490.6	(7901.84,13754.32)
Central Europe	6114.95	(4529.21,8214.71)	6072.84	(8098.15,4500.39)	6060.04	(8097.3,4494.59)	6077.04	(4523.23,8108.42)
Western Europe	5990.77	(4427.69,8044.53)	5895.98	(7944.16,4346.31)	5902.11	(7917.7,4354.23)	5912.94	(4354.13,7966.79)
