# Supplementary material for: Age, Gender, and Socio-demographic Disparities in Near Vision Loss: A Global Burden of Disease Study Focusing on Belt and Road Countries
Source: Research Square preprint supplement (doi:10.21203/rs.3.rs-6582843/v1), 2025-06-09
Supplement: Supplementary file 9 [file 945e5941cfebcf40f889a41a.xlsx]

## Sheet: Sheet1
	ASR of prevalence in 1990		ASR of prevalence in 2019		ASR of prevalence in 2020		ASR of prevalence in 2021		ASR of YLDs in 1990		ASR of YLDs in 2019		ASR of YLDs in 2020		ASR of YLDs in 2021
Gobal/Regions	Rate	95%UI	Rate	95%UI	Rate	95%UI	Rate	95%UI	Rate	95%UI	Rate	95%UI	Rate	95%UI	Rate	95%UI
Global	9788.66	(7371.64, 12888.27)	13157.06	(9949.15, 17190.03)	13484.93	(10282.08, 17565.14)	13436.18	(10223.45, 17585.84)	98.26	(44.11, 190.99)	132.86	(59.81, 256.48)	136.07	(61.08, 261.33)	135.52	(60.82, 260.39)
Central Asia	8846.17	(6771.48, 11489.21)	8637.89	(6466.30, 11428.14)	8655.91	(6508.04, 11490.13)	8642.16	(6442.18, 11440.93)	88.52	(38.93, 167.89)	86.49	(37.96, 168.31)	86.58	(37.85, 167.81)	86.37	(37.82, 167.82)
Central Europe	6114.95	(4529.21, 8214.71)	6072.84	(4500.39, 8098.15)	6060.04	(4494.59, 8097.30)	6077.04	(4523.23, 8108.42)	60.79	(27.11, 119.44)	60.67	(26.75, 120.22)	60.47	(26.91, 119.79)	60.57	(26.91, 118.92)
Eastern Europe	11145.02	(8336.13, 14567.28)	13813.76	(10406.74, 18196.63)	13835.09	(10404.67, 18393.90)	13644.78	(10228.70, 17972.77)	111.09	(49.78, 216.56)	138.38	(62.82, 262.55)	138.51	(62.76, 263.38)	136.40	(62.56, 260.53)
Australasia	6341.92	(4587.37, 8722.61)	6319.35	(4600.68, 8752.85)	6285.89	(4534.57, 8611.21)	6313.71	(4586.38, 8625.93)	63.83	(28.09, 123.37)	63.68	(27.84, 124.62)	63.35	(28.33, 124.86)	63.68	(28.04, 125.17)
High-income Asia Pacific	6824.40	(4994.76, 9264.42)	6691.70	(4878.18, 9152.47)	6675.50	(4875.50, 9116.53)	6702.48	(4908.07, 9141.57)	69.25	(30.32, 137.00)	68.11	(29.91, 136.13)	67.88	(29.89, 136.13)	68.15	(29.88, 136.08)
High-income North America	5275.85	(3823.34, 7223.06)	6666.36	(4709.15, 9392.98)	5785.04	(4055.60, 8106.19)	5786.60	(4069.27, 8165.47)	53.29	(23.08, 103.97)	67.10	(29.66, 133.19)	58.13	(25.06, 115.89)	58.10	(25.01, 113.94)
Southern Latin America	6622.53	(4854.38, 9045.58)	6576.20	(4768.92, 8873.66)	6581.55	(4813.15, 8916.54)	6575.17	(4786.51, 9033.37)	66.77	(29.81, 134.84)	66.26	(29.89, 130.11)	66.30	(30.09, 131.11)	66.16	(29.52, 130.95)
Western Europe	5990.77	(4427.69, 8044.53)	5895.98	(4346.31, 7944.16)	5902.11	(4354.23, 7917.70)	5912.94	(4354.13, 7966.79)	60.10	(27.04, 118.15)	59.27	(26.56, 117.02)	59.29	(26.87, 116.77)	59.38	(26.76, 116.71)
Andean Latin America	13249.78	(9874.13, 17640.95)	13180.60	(9807.06, 17704.77)	13176.26	(9847.70, 17551.81)	13195.33	(9801.72, 17478.63)	133.78	(58.89, 262.05)	133.14	(58.67, 262.45)	132.81	(59.73, 257.41)	132.97	(59.23, 258.70)
Caribbean	11070.01	(8301.73, 14602.45)	11044.76	(8228.17, 14618.18)	11044.92	(8353.56, 14545.60)	11037.13	(8206.71, 14587.69)	111.66	(49.70, 220.64)	111.13	(49.64, 218.17)	111.03	(49.43, 216.83)	110.91	(49.22, 217.75)
Central Latin America	10098.66	(7924.44, 12695.07)	12644.92	(9470.38, 16797.18)	12632.25	(9444.76, 16846.94)	11629.36	(8718.20, 15323.78)	101.20	(45.96, 188.11)	127.04	(57.12, 252.12)	126.76	(56.51, 251.84)	116.62	(52.33, 228.04)
Tropical Latin America	13880.46	(10374.39, 18410.74)	13895.37	(10356.95, 18361.31)	13931.29	(10353.31, 18470.01)	13933.26	(10428.84, 18437.72)	138.62	(61.38, 275.57)	139.07	(61.33, 275.53)	139.24	(62.02, 275.79)	139.16	(61.55, 275.10)
North Africa and Middle East	9840.67	(7682.23, 12450.63)	10517.19	(7910.31, 13815.05)	10501.55	(7915.82, 13771.89)	10490.63	(7901.84, 13754.32)	98.45	(45.04, 182.00)	105.07	(47.12, 202.46)	104.81	(47.30, 202.42)	104.61	(47.08, 201.93)
South Asia	13421.72	(9893.51, 17947.39)	20822.17	(15620.39, 27199.92)	20772.75	(15638.46, 26735.52)	20747.02	(15692.17, 26642.32)	133.16	(59.84, 257.04)	209.50	(94.06, 381.94)	208.44	(94.15, 378.18)	207.99	(94.08, 378.38)
East Asia	10176.85	(7736.21, 13337.14)	13913.74	(10379.21, 18287.99)	15638.36	(11698.84, 20582.36)	15509.26	(11531.38, 20444.81)	102.60	(44.92, 199.20)	141.20	(64.43, 271.44)	158.80	(71.76, 305.21)	157.57	(71.35, 300.78)
Oceania	10443.31	(7751.16, 14003.20)	10411.46	(7801.59, 13766.46)	10409.18	(7754.21, 13955.75)	10405.10	(7696.43, 13982.18)	104.47	(46.12, 204.14)	104.13	(46.60, 204.41)	104.13	(46.56, 206.86)	103.98	(46.21, 203.50)
Southeast Asia	9797.28	(7367.85, 12768.65)	10472.04	(7933.26, 13660.61)	10507.93	(7937.32, 13756.01)	10503.95	(7965.77, 13743.20)	98.38	(44.15, 190.16)	105.46	(47.36, 204.22)	105.79	(47.58, 204.70)	105.68	(47.17, 204.99)
Central Sub-Saharan Africa	18114.42	(13810.31, 23900.88)	17958.38	(13557.85, 23711.79)	18018.47	(13568.53, 23757.76)	17981.13	(13558.96, 23696.95)	181.08	(81.81, 355.23)	180.72	(80.74, 353.60)	181.10	(81.19, 356.85)	180.69	(81.29, 351.49)
Eastern Sub-Saharan Africa	10541.89	(7921.10, 13791.01)	10617.37	(7968.96, 13944.37)	10633.93	(7948.60, 13922.90)	10621.19	(7967.73, 13874.26)	105.11	(46.75, 202.65)	106.47	(47.00, 205.71)	106.57	(47.07, 205.93)	106.22	(47.01, 205.80)
Southern Sub-Saharan Africa	24245.97	(18816.37, 31122.38)	26535.31	(20788.75, 32815.10)	25090.23	(19684.94, 31716.04)	25064.36	(19715.99, 31575.38)	245.24	(109.67, 466.84)	267.20	(119.58, 503.30)	252.24	(114.16, 482.57)	251.60	(114.08, 482.52)
Western Sub-Saharan Africa	12775.62	(9530.09, 17079.52)	12771.45	(9608.08, 16881.64)	12851.66	(9667.93, 16963.76)	12861.22	(9701.19, 17011.27)	128.18	(56.97, 253.90)	128.77	(57.18, 252.55)	129.49	(57.45, 252.71)	129.55	(57.46, 253.17)
