# Supplementary material for: Age, Gender, and Socio-demographic Disparities in Near Vision Loss: A Global Burden of Disease Study Focusing on Belt and Road Countries
Source: Research Square preprint supplement (doi:10.21203/rs.3.rs-6582843/v1), 2025-06-09
Supplement: Supplementary file 10 [file b86a9cb8e04940f65648a918.xlsx]

## Sheet: YLDs
	YLDs in people aged <5 yrs		YLDs in people aged 5-9 yrs		YLDs in people aged 10-14 yrs		YLDs in people aged 15-19 yrs		YLDs in people aged 20-24 yrs		YLDs in people aged 25-29 yrs		YLDs in people aged 30-34 yrs		YLDs in people aged 35-39 yrs		YLDs in people aged 40-44 yrs		YLDs in people aged 45-49 yrs		YLDs in people aged 50-54 yrs		YLDs in people aged 55-59 yrs		YLDs in people aged 60-64 yrs		YLDs in people aged 65-69 yrs		YLDs in people aged 70-74 yrs		YLDs in people aged 75-79 yrs		YLDs in people aged 80-84 yrs		YLDs in people aged ≥85 yrs
Gobal/Regions/Countries	Rate	95%UI	Rate	95%UI	Rate	95%UI	Rate	95%UI	Rate	95%UI	Rate	95%UI	Rate	95%UI	Rate	95%UI	Rate	95%UI	Rate	95%UI	Rate	95%UI	Rate	95%UI	Rate	95%UI	Rate	95%UI	Rate	95%UI	Rate	95%UI	Rate	95%UI	Rate	95%UI
Global	3.22	(1.23,6.85)	9.65	(3.65,20.62)	15.92	(6.02,34.04)	22.02	(8.31,47.08)	32.47	(11.82,66.49)	46.91	(14.31,109.67)	78.43	(27.57,174.78)	126.52	(35.56,316.25)	198.24	(70.7,415.84)	298.92	(94.71,671.06)	365.95	(144.02,783.13)	394.28	(136.41,850.73)	390.79	(138.53,822.7)	383.98	(134.55,847.85)	366.45	(129,816.5)	362.19	(127.82,772.55)	350.39	(131.05,735.8)	320.26	(130.97,663.57)
SDI Regions
Low SDI	3.85	(1.48,8.12)	11.92	(4.6,25.18)	19.67	(7.6,41.62)	27.28	(10.57,57.77)	40.31	(14.97,81.92)	58.75	(18.26,138.04)	95.29	(34.11,210.96)	153.97	(46.23,380.3)	227.37	(83.38,471.54)	316.40	(105.56,683.51)	373.13	(150.79,756.83)	391.35	(141.3,832.9)	410.52	(146.44,872.73)	424.36	(151.44,925.34)	444.29	(161.79,956.9)	466.03	(164.9,976.19)	470.78	(179.41,967.04)	450.89	(177.32,914.23)
Low-middle SDI	3	(1.14,6.4)	9.13	(3.4,19.49)	15.09	(5.67,32.21)	20.89	(7.74,44.77)	31.91	(11.5,67.22)	47.97	(14.42,111.88)	96.61	(35.53,211.37)	178.21	(48.06,448.91)	268.56	(96.89,554.04)	371.83	(121.89,792.01)	424.50	(167.74,861.35)	427.37	(149.83,909.37)	433.35	(153.37,924.17)	435.58	(152.2,955.44)	452.25	(163.75,979.9)	479.76	(169.48,994.92)	490.69	(188.45,990.98)	480.85	(190.93,956.47)
Middle SDI	3.44	(1.33,7.39)	10.18	(3.89,22.06)	17.03	(6.49,36.57)	23.84	(9.13,51.39)	36.08	(13.11,74.18)	53.18	(16.27,124.17)	87.8	(30.5,195.22)	141.27	(39.65,354.1)	220.05	(78.5,460.21)	328.82	(103.67,741.71)	407.82	(159.53,870.9)	450.79	(155.86,969.47)	453.39	(161.32,958.04)	453.13	(159.33,1006.28)	445.12	(154.84,965.56)	441.73	(156.52,941.81)	432.49	(162.67,893.07)	424.85	(167.62,863.06)
High-middle SDI	2.88	(1.07,6.28)	8.47	(3.16,18.41)	14.01	(5.15,30.31)	19.47	(7.22,42.2)	27.97	(10.19,57.44)	39.74	(12.22,94.89)	59.56	(19.98,139.46)	83.15	(23.85,215.71)	149.74	(53.7,328.4)	270.10	(82.64,651.15)	364.35	(144.38,796.57)	420.94	(145.34,908.58)	423.52	(150.51,886.45)	408.16	(141.2,902.49)	384.12	(134.67,847.21)	364.05	(129.49,770.48)	365.99	(135.87,781.32)	347.43	(140.2,721.67)
High SDI	1.76	(0.61,3.97)	5.33	(1.87,11.92)	8.73	(3.06,19.88)	12.18	(4.23,27.66)	16.92	(6.19,36.06)	22.65	(6.97,52.79)	30.16	(9.5,68.2)	38.80	(11.09,103.13)	83.41	(29.38,187.13)	163.65	(50.17,406.94)	211.08	(82.16,473.38)	224.27	(79.63,489.37)	221.51	(74.58,472.01)	208.50	(71.14,475.01)	194.02	(65.84,460.38)	191.18	(65.94,416.49)	190.44	(66.55,428.98)	188.80	(77.07,435.67)
East Asia	3.32	(1.24,7.21)	9.41	(3.56,20.67)	15.74	(5.81,34.42)	22.06	(8.26,48.23)	32.41	(11.54,67.51)	46.83	(14.37,111.51)	67.73	(22.29,161.01)	94.45	(27.09,251.22)	186.43	(67.07,410.92)	344.27	(105.61,833.04)	461.02	(182.48,1013.89)	537.16	(187.77,1160.49)	551.30	(197.15,1152.47)	508.23	(176.82,1105.72)	457.78	(155.95,1004.58)	403.56	(138.87,860.41)	355.47	(122.39,787.7)	320.44	(127.37,695.7)
China	3.32	(1.24,7.2)	9.39	(3.55,20.61)	15.7	(5.78,34.37)	21.99	(8.23,48.16)	32.52	(11.58,67.93)	47.33	(14.5,112.88)	68.5	(22.56,162.73)	96.00	(27.57,255.2)	189.43	(68.23,416.72)	348.01	(106.87,840.28)	465.11	(184.11,1024.5)	540.88	(189.51,1167.28)	555.54	(198.55,1162.16)	510.96	(177.69,1109.51)	459.33	(156.54,1008.03)	403.31	(138.69,861.72)	353.90	(121.9,784.94)	318.14	(125.57,694.83)
Central Asia	2.42	(0.88,5.37)	7.50	(2.75,16.03)	12.56	(4.54,27.73)	17.6	(6.53,38.98)	23.07	(8.37,48.63)	28.77	(9.27,66.26)	35.16	(11.05,80.35)	42.26	(12.22,111.36)	64.78	(21.28,152.52)	102.47	(27.63,264.25)	154.41	(57.18,343.66)	219.39	(64.74,483.45)	279.36	(98.04,600.25)	334.18	(107.41,791.37)	388.35	(131.27,898.39)	443.19	(148.68,977.1)	493.92	(191.16,1016.91)	544.92	(222.66,1095.84)
Armenia	2.51	(0.88,5.53)	7.56	(2.72,16.59)	12.66	(4.61,27.29)	17.78	(6.78,39.21)	23.34	(8.41,49.7)	29.25	(9.07,66.67)	35.47	(10.96,81.13)	42.34	(12.47,109.38)	65.22	(21.47,151.41)	103.59	(27.9,268.45)	156.05	(57.97,342.26)	221.62	(65.96,489.91)	282.04	(97.91,612.42)	336.83	(108.13,810.8)	392.15	(130.65,901.85)	446.91	(149.23,1002.64)	497.45	(187.95,1020.56)	539.30	(215,1077.47)
Azerbaijan	2.52	(0.9,5.62)	7.53	(2.51,15.93)	12.65	(4.49,27.85)	17.66	(6.59,38.48)	23.31	(8.51,49.36)	29.13	(9.3,67.55)	35.63	(11.25,81.3)	42.70	(12.37,111.99)	65.56	(21.6,150.54)	103.83	(27.51,269.91)	156.30	(57.77,351.91)	222.16	(64.51,497.1)	282.50	(98.5,604.7)	337.42	(108.15,803.3)	392.35	(131.68,901.24)	446.79	(147.09,1003.2)	496.95	(188.64,1018.05)	544.84	(218.63,1088.44)
Georgia	2.68	(0.96,5.74)	8.02	(2.87,17.46)	13.43	(4.85,29.89)	18.72	(6.66,41.52)	24.63	(9.08,51.45)	31	(9.85,71.31)	37.81	(11.53,85.94)	45.20	(13.2,124.26)	69.38	(22.59,164.39)	110.15	(29.92,289.74)	165.52	(61.95,371.73)	234.37	(70.42,519.11)	297.07	(107.27,638.77)	354.13	(111.05,846.79)	411.22	(142.34,954.84)	467.70	(156.71,990.55)	519.92	(198.89,1052.79)	565.10	(247.76,1124.53)
Kazakhstan	2.26	(0.78,4.96)	7.10	(2.61,15.66)	11.92	(4.29,25.3)	16.67	(6.18,37.51)	21.87	(8.03,47.45)	27.18	(8.53,63.7)	33.09	(10.3,74.96)	39.67	(11.64,102.42)	61.07	(19.67,142.34)	96.56	(26.49,244.47)	145.61	(53.39,319.64)	206.55	(61.08,458.12)	262.92	(92.43,565.67)	314.45	(101.49,749.1)	368.81	(125.34,830.95)	426.35	(141.07,932)	477.04	(184.01,995.81)	523.48	(206.21,1082.47)
Kyrgyzstan	2.48	(0.9,5.39)	7.60	(2.91,15.87)	12.77	(4.61,27.68)	17.85	(6.61,39.76)	23.25	(8.79,50.23)	29.01	(9.26,67.59)	35.62	(11.14,83.44)	43.19	(12.59,112.65)	66.09	(21.42,155.4)	104.38	(29.19,273.62)	156.69	(58.29,348.74)	222.53	(66.32,486.46)	283.79	(100.4,613.41)	341.42	(111.37,790.51)	397.37	(135.11,909.57)	449.14	(150.78,1003.31)	503.15	(196.34,1028.29)	554.80	(226.15,1112.37)
Mongolia	2.5	(0.92,5.55)	7.61	(2.75,16.61)	12.71	(4.74,28.26)	17.82	(6.63,40.08)	23.29	(8.43,49.25)	28.89	(8.88,65.97)	35.4	(11.51,80.07)	42.93	(12.95,114.31)	65.74	(21.34,153.51)	103.60	(27.81,269.92)	156.02	(57.9,348.15)	221.59	(67.32,487.02)	283.38	(102.53,612.72)	341.77	(110.09,806.22)	398.69	(130.35,920.4)	448.78	(151.23,999.17)	493.30	(188.09,1002.52)	542.04	(209.6,1095.57)
Tajikistan	2.44	(0.86,5.33)	7.60	(2.71,15.84)	12.73	(4.36,28.24)	17.86	(6.61,38.72)	23.40	(8.65,48.33)	29.32	(9.22,68.73)	35.94	(11.27,83.34)	43.44	(12.84,117.72)	66.14	(22.06,149.68)	103.75	(28.04,263.95)	156.31	(57.38,346.38)	222.41	(66.47,487.98)	283.74	(100.17,611.15)	339.96	(108.96,804.42)	392.36	(129.52,908.58)	437.02	(146.56,950.2)	487.98	(187.96,997.47)	539.08	(213.08,1075.11)
Turkmenistan	2.47	(0.9,5.55)	7.61	(2.76,16.87)	12.7	(4.56,27.23)	17.74	(6.35,38.74)	23.18	(8.27,49.77)	29.19	(9.38,67.13)	35.83	(11.15,84.66)	43.01	(12.93,112.68)	65.71	(22.26,157.81)	103.69	(27.8,267.57)	155.99	(57.68,350.71)	221.28	(65.29,483.9)	282.64	(101.96,603.28)	340.70	(111.54,799.53)	395.66	(133.92,911.34)	448.22	(151.61,977.06)	497.74	(186.53,1016.67)	547.60	(236.09,1086.1)
Uzbekistan	2.43	(0.88,5.19)	7.59	(2.69,16.71)	12.68	(4.78,28.57)	17.78	(6.43,39.33)	23.21	(8.31,48.27)	28.95	(9.34,67.64)	35.43	(11.21,81.93)	42.60	(12.23,113.58)	65.31	(21.39,151.1)	103.59	(27.76,268.85)	156.03	(58.06,349.7)	221.73	(67.3,481.57)	282.17	(98.42,608.11)	337.53	(109.93,796.03)	391.51	(129.53,910.56)	444.23	(147.78,981.43)	494.61	(188.91,1013.17)	547.43	(222.58,1085.43)
South Asia	2.21	(0.8,4.85)	6.81	(2.43,14.69)	11.57	(4.18,25.35)	16.4	(5.93,35.48)	27.99	(9.88,60.5)	46.1	(13.19,110.66)	125.61	(46.14,274.11)	267.70	(72.77,647.64)	401.2	(150.23,796.01)	528.51	(182.76,1022.8)	578.91	(238.86,1157.55)	551.92	(203.04,1171.36)	531.21	(190.65,1124.98)	512.33	(180.66,1100.29)	511.69	(184.68,1086.19)	526.45	(193.37,1095.6)	528.61	(199.66,1080.09)	505.83	(200.44,997.81)
Bangladesh	1.59	(0.57,3.71)	4.91	(1.64,11.19)	8.25	(2.97,19.66)	11.73	(4.17,28.48)	16.07	(5.65,34.41)	20.83	(5.88,50.14)	43.52	(14.52,108.73)	83.99	(21.87,237.74)	157.6	(55.95,356.91)	262.64	(77.74,646.77)	311.00	(114.83,692.2)	307.60	(110.89,679.89)	307.58	(102.24,684.67)	310.44	(104.5,713.53)	315.15	(106.44,747.37)	319.79	(110.28,685.92)	306.96	(107.01,659.95)	282.79	(110,635.21)
Bhutan	1.93	(0.63,4.53)	5.93	(2.2,12.65)	10.03	(3.63,22.05)	14.04	(4.7,31.61)	18.46	(6.65,39.54)	23.77	(7.19,56.05)	50.94	(17.01,128.13)	99.41	(25.01,264.97)	184.71	(64.5,399.31)	307.34	(89.47,735.5)	369.54	(135.82,839.13)	372.08	(136.53,811.83)	378.61	(120.06,827.87)	387.18	(127.18,907.94)	394.74	(132.83,909.81)	401.89	(139.09,883.56)	385.26	(136.32,842.15)	353.32	(138.41,763.33)
India	2.57	(0.95,5.61)	7.83	(2.82,16.94)	13.12	(4.78,28.5)	18.38	(6.71,39.6)	31.84	(11.24,68.71)	53.29	(15.13,127.74)	148.55	(54.48,321.35)	316.69	(85.39,749.71)	466.83	(174.83,921.8)	599.01	(207.59,1159.22)	646.34	(267.91,1271.65)	610.42	(223.08,1303.7)	580.66	(206.92,1238)	555.16	(194.73,1197.17)	554.93	(200,1161.99)	577.28	(209.85,1164.31)	581.00	(222.25,1163.2)	557.81	(223.72,1102.49)
Nepal	2.72	(0.92,5.95)	8.41	(2.89,18.68)	14.09	(5.17,31.57)	19.87	(7.15,45.24)	26.29	(9.95,56.45)	33.67	(9.72,80.36)	98.17	(38.25,197.7)	219.39	(82.1,466.48)	411.38	(190.57,786.08)	674.23	(309.08,1217.35)	779.09	(361.15,1423.47)	728.43	(322.35,1412.26)	680.47	(297.04,1339.6)	632.29	(268.42,1236.79)	555.60	(232.88,1081.84)	450.82	(187.19,913.17)	373.40	(140.07,777.75)	327.24	(129.08,713.93)
Pakistan	1.09	(0.35,2.61)	3.33	(1.04,7.8)	5.58	(1.84,13.83)	7.81	(2.5,18.87)	13.28	(4.64,29.07)	22.05	(6.68,50.76)	41.34	(13.98,98.61)	71.18	(18.34,194.79)	124.7	(42.75,287.08)	201.21	(59.64,514.15)	244.22	(87.45,561.54)	256.74	(90.99,577.47)	264.93	(86.64,580.98)	266.07	(86.77,619.62)	267.62	(85.96,628.91)	272.34	(93.45,605.81)	263.31	(90.95,586.1)	252.59	(100.59,593.9)
Southeast Asia	2.83	(1.06,6.04)	8.64	(3.23,18.73)	14.53	(5.41,31.56)	20.39	(7.64,43.99)	29.63	(10.78,60.15)	41.27	(12.68,97.67)	55.17	(18.01,126.31)	71.45	(21.15,188.35)	114.31	(38.55,260.54)	179.91	(51.7,464.62)	235.44	(87.84,539.06)	277.44	(88.94,617.13)	315.08	(108.93,669.33)	349.23	(117,780.73)	389.65	(137.93,860.55)	431.26	(151.45,886.91)	447.81	(172.17,915.2)	428.74	(174.47,860.27)
Cambodia	1.89	(0.67,4.21)	5.83	(2.08,13.14)	9.76	(3.46,22.29)	13.68	(4.49,31.73)	18.30	(6.8,39.6)	23.58	(7.09,54.72)	31.12	(9.9,72.74)	41.00	(11.55,109.78)	70.48	(22.91,165.1)	119.02	(32.99,293.38)	156.47	(58.35,352.64)	180.95	(58.62,401.63)	214.60	(72.45,478.77)	253.00	(79.17,618.54)	303.57	(100.92,690.34)	366.60	(122.7,776.81)	397.93	(147.39,848.26)	398.53	(156.53,843.86)
Indonesia	3.18	(1.17,6.84)	9.79	(3.6,21.4)	16.35	(6.12,35.83)	22.88	(8.61,50.05)	33.97	(12.2,69.41)	49.45	(15.16,117.5)	68.04	(22.05,154.65)	89.62	(26.74,234.17)	140.42	(46.83,322.39)	219.96	(62.13,575.13)	292.59	(109.17,668.39)	357.70	(111.37,793.74)	413.89	(142.14,903.09)	460.32	(154.69,1028.85)	510.32	(182.75,1145.85)	565.16	(200.94,1157.62)	588.48	(223.68,1193.59)	578.36	(228.44,1158.93)
Lao People's Democratic Republic	1.49	(0.51,3.55)	4.63	(1.33,10.87)	7.75	(2.58,17.96)	10.83	(3.34,25.46)	14.66	(5.34,32.76)	18.97	(5.73,44.67)	25.27	(7.61,58.63)	33.02	(9.17,89.9)	56.22	(19.06,128.79)	94.19	(26.82,241.32)	125.64	(45.13,283.97)	149.78	(46.81,333.61)	177.37	(59.64,388.79)	206.38	(60.92,497.47)	246.78	(83.06,557.29)	299.38	(100.04,662.3)	326.29	(118.33,720.69)	330.74	(131.98,749.27)
Malaysia	1.03	(0.3,2.62)	3.14	(1.01,8.04)	5.29	(1.64,12.94)	7.31	(2.23,17.84)	10.03	(3.64,21.78)	13.19	(3.85,31.54)	17.21	(5.02,40.93)	22.13	(5.94,59.93)	37.75	(12.56,87.04)	63.74	(18.2,165.31)	84.43	(30.3,193.79)	99.29	(32.86,223.31)	117.07	(39.8,258.26)	137.00	(41.57,342.1)	164.43	(55.64,367.28)	199.23	(66,452.36)	217.95	(78.1,487.15)	224.90	(89.54,549.79)
Maldives	1.92	(0.69,4.36)	5.80	(1.95,12.85)	9.71	(3.44,21.81)	13.43	(4.78,29.86)	17.66	(6.49,37.63)	22.71	(6.94,52.34)	30.05	(9.82,70.52)	38.72	(10.99,100.58)	65.92	(22.31,147.38)	111.65	(32,283.44)	149.87	(55.38,342.15)	179.33	(59.21,409.27)	213.52	(74.18,473.71)	250.65	(78.39,618.23)	299.53	(101.79,673.71)	361.57	(119.6,769.67)	392.09	(143.38,817.82)	396.59	(156.37,841.59)
Myanmar	1.25	(0.39,2.9)	3.87	(1.21,9.33)	6.49	(2.14,14.88)	9.11	(2.88,21.37)	12.21	(4.5,27.37)	15.87	(4.91,37.94)	20.94	(6.24,48.96)	27.64	(7.3,69.85)	47.28	(15.74,105.1)	79.54	(22.15,212.88)	105.32	(38.98,245.13)	123.67	(40.08,277.03)	145.70	(49.75,321.22)	169.73	(51.1,404.57)	202.93	(66.13,452.91)	246.67	(82.4,557.79)	269.67	(96.59,593.31)	278.36	(111.45,627.38)
Philippines	4.97	(1.89,10.72)	15.30	(5.77,33.3)	25.6	(9.75,55.21)	35.82	(13.65,77.68)	53.33	(19.86,107.54)	77.84	(24.3,184.02)	106.76	(35.8,247.44)	139.82	(42.06,367.4)	217.96	(75.79,481.25)	340.51	(98.8,847.64)	443.37	(166.37,1000.35)	524.96	(177.83,1143.28)	577.65	(205.54,1235.11)	600.64	(219.65,1291)	621.42	(225.81,1306.47)	641.97	(254.64,1278.02)	648.00	(257.25,1295.74)	631.40	(264.55,1279.67)
Sri Lanka	2.17	(0.76,4.82)	6.63	(2.43,14.93)	11.1	(3.96,24.14)	15.51	(5.61,33.91)	20.44	(7.29,43.89)	25.76	(8.16,61.51)	34.25	(10.85,79.94)	45.61	(13.24,120.41)	78.31	(27.04,176.35)	132.45	(37.67,328.28)	175.12	(63.27,397.35)	206.71	(65.63,474.23)	242.97	(81.09,537.34)	282.67	(87.16,688.61)	335.42	(110.63,764.67)	402.23	(138.5,843.54)	436.07	(163.43,912.52)	438.54	(169.98,916.96)
Thailand	1.93	(0.65,4.46)	5.80	(2.03,13.55)	9.69	(3.43,21.77)	13.65	(4.76,30.6)	18.18	(6.58,39.23)	23.2	(7.11,53.15)	30.72	(9.57,73.01)	40.54	(11.36,108.3)	69.23	(23.26,161.78)	116.65	(33.98,300.97)	154.53	(55.41,351)	182.17	(59.21,422.31)	214.61	(74.38,465.28)	251.00	(77.25,602.16)	300.48	(102.3,679.55)	363.84	(123.42,802.73)	395.69	(146.47,858.21)	398.76	(164.67,838.05)
Viet Nam	1.28	(0.39,3.15)	3.86	(1.29,9.12)	6.48	(2.02,15.95)	9.14	(3.03,22.21)	12.28	(4.36,27.45)	15.9	(4.74,38.01)	21.06	(6.6,48.55)	27.60	(7.66,71.27)	47.15	(15.58,107.94)	79.07	(21.82,195.84)	104.78	(36.81,236.46)	123.89	(39.17,274.04)	146.51	(50.03,317.21)	171.99	(51.04,426.27)	207.78	(67.57,467.93)	256.02	(84.35,582.61)	282.35	(102.22,616.75)	288.61	(116.78,650.66)
High-income Asia pacific	1.56	(0.5,3.59)	4.67	(1.53,10.85)	7.81	(2.56,18.11)	10.9	(3.55,25.78)	17.14	(6.24,36.73)	26.13	(7.88,61.6)	37.2	(12.41,84.4)	50.29	(14.13,132.52)	89.83	(31.11,206.32)	155.64	(44.67,385.21)	193.56	(71.67,443.63)	203.21	(72.12,454.48)	201.12	(65.85,437.01)	189.60	(63.44,438.96)	186.26	(59.77,444.58)	189.00	(65.01,416.75)	183.89	(63.27,433.25)	186.61	(73.79,446.92)
Brunei Darussalam	1.58	(0.54,3.57)	4.84	(1.64,11.52)	8.09	(2.72,19.02)	11.26	(3.74,27.05)	16.26	(5.84,34.86)	23.1	(6.7,52.85)	31.5	(9.75,72.39)	41.35	(11.02,115.22)	81.3	(28.69,184.82)	151.46	(44.83,379.73)	187.25	(69.55,432.21)	187.78	(68.73,418.84)	182.58	(56,396.99)	170.97	(56.88,401.63)	165.61	(51.97,390.7)	164.87	(56.93,373.97)	157.45	(54.81,347.54)	150.48	(55.66,386.57)
Singapore	1.61	(0.5,4.09)	4.90	(1.65,11.4)	8.23	(2.83,19.8)	11.32	(3.76,27.68)	16.54	(6.2,34.79)	23.69	(7.22,55.62)	31.87	(10.06,74.69)	41.91	(11.5,114.81)	82.51	(29.5,187.45)	152.31	(44.71,377.53)	188.10	(70.47,427.3)	189.91	(69.65,418.63)	184.52	(59.28,402.03)	173.14	(58.37,410.14)	168.24	(53.58,395.81)	171.66	(58.78,392.68)	165.06	(57.43,376.8)	158.04	(61.89,381.77)
North Africa and Middle East	3.54	(1.33,7.65)	10.72	(4.12,23.04)	17.95	(6.74,38.43)	25.11	(9.65,53.77)	32.39	(12.29,67.6)	39.38	(12.44,90.89)	49.67	(15.82,112.75)	63.24	(18.34,169.1)	105.77	(35.43,247.47)	176.39	(50.64,447.44)	234.26	(86.42,531.33)	281.83	(90.14,631.16)	313.78	(104.72,676.41)	333.31	(110.48,764.86)	368.51	(125.91,863.82)	418.01	(140.22,913.14)	456.69	(176.49,937.66)	485.86	(192.82,975.63)
Afghanistan	3.32	(1.18,6.94)	10.46	(4.08,22.29)	17.43	(6.25,37.88)	24.36	(9.05,53)	30.86	(11.94,63.07)	36.84	(11.34,84.98)	46.85	(15.17,107.87)	60.50	(17.45,165.27)	101.92	(34.2,246.43)	169.84	(47.27,431.82)	225.09	(82.69,501.68)	271.48	(88.3,605.63)	303.79	(104.27,657.2)	320.59	(106.09,734.03)	349.03	(117.35,792.55)	389.44	(127.09,863.76)	429.03	(163.74,897.91)	466.09	(177.82,953.25)
Bahrain	3.42	(1.26,7.56)	10.35	(3.97,21.56)	17.28	(6.44,36.87)	23.9	(8.78,50.59)	29.97	(11.6,61.58)	35.14	(11.64,79.54)	43.16	(13.82,101.6)	55.36	(15.72,142.72)	94.59	(31.34,219.27)	156.78	(43.93,417.12)	214.25	(79.09,493.94)	256.92	(80.6,566.02)	285.20	(96.28,615.65)	302.97	(95.85,695.03)	334.63	(112.03,762.11)	390.21	(130.19,830.11)	434.46	(170.51,901.45)	476.35	(176.17,964.8)
Egypt	3.91	(1.48,8.53)	11.92	(4.42,25.87)	19.98	(7.66,42.81)	28.02	(10.45,59.06)	35.76	(13.8,75.63)	43.02	(13.93,101.72)	54.42	(17.36,122.73)	69.54	(20.09,184.08)	117.46	(38.57,274.58)	197.34	(54.64,521.75)	260.72	(95.29,603.53)	306.76	(96.4,693.37)	338.87	(115.31,744.77)	357.00	(117.41,840.62)	393.11	(135.46,896.63)	445.88	(153.26,972.26)	485.49	(187.35,979.88)	506.46	(198.79,1036.73)
Iran (Islamic Republic of)	2.5	(0.92,5.77)	7.33	(2.72,17.07)	12.26	(4.52,27.92)	17.09	(6.4,39.27)	24.73	(8.91,51.54)	34.95	(10.89,81.55)	46.48	(14.57,105.9)	59.11	(17.06,161.07)	90.34	(29.62,215.1)	139.33	(39.43,364.65)	184.95	(68.1,425.32)	226.46	(71.62,493.28)	256.03	(86.05,558.24)	272.60	(87.71,628.43)	306.09	(99.7,700.94)	350.47	(116.49,765.83)	378.63	(140.16,797.66)	401.67	(158.63,855.3)
Iraq	3.42	(1.27,7.63)	10.41	(3.52,23.49)	17.33	(6.39,38.52)	24.17	(9.07,52.43)	30.64	(11.7,64.16)	36.61	(11.5,84.52)	46.39	(14.92,105.15)	59.51	(17.22,160.67)	100.39	(34.76,234.87)	167.50	(47.28,412.11)	221.20	(81.74,492.69)	261.66	(83.46,589.73)	292.59	(98.89,634.36)	312.06	(101.81,725.32)	345.78	(113.91,804.09)	393.16	(130.38,856.65)	438.05	(169.73,915.87)	483.96	(191.43,977.64)
Jordan	3.4	(1.15,7.38)	10.33	(3.81,21.77)	17.3	(6.21,37.02)	24.11	(9.22,52.81)	30.60	(11.44,63.27)	36.48	(11.08,83.59)	45.82	(14.37,105.83)	58.69	(16.42,152.52)	99.34	(32.49,230.23)	167.17	(46.04,423.99)	221.83	(80.73,509.07)	262.27	(84.29,579.25)	291.86	(100.71,638.31)	311.14	(100.42,717.35)	344.31	(113.96,815.71)	391.14	(126.97,848.11)	432.39	(161.52,907.74)	470.60	(181.31,959.56)
Kuwait	3.41	(1.25,7.47)	10.27	(3.62,21.66)	17.17	(6.46,37.66)	24.05	(8.89,51.54)	30.62	(11.34,64.34)	36.61	(11.73,86.45)	46.7	(14.74,107.47)	59.45	(16.32,155.76)	98.66	(32.39,225.53)	166.21	(46.87,414.99)	218.37	(77.42,499.5)	258.75	(81.38,583.82)	285.76	(98.79,627.8)	300.25	(96.6,714.31)	332.07	(111.04,768.56)	379.46	(125.04,817.61)	418.87	(157.12,887.04)	465.77	(191.83,941.64)
Lebanon	3	(1.11,6.39)	9.20	(3.27,19.99)	15.33	(5.26,33.83)	21.44	(8.03,45.13)	27.06	(10.1,56.27)	32.51	(10.61,72.76)	41.12	(13.17,94.13)	52.78	(14.84,140.98)	89.53	(28.59,208.18)	150.29	(42.94,376.47)	198.62	(75.38,443.52)	234.67	(74.9,528.62)	262.52	(84.24,573.89)	280.42	(89.63,667.38)	308.71	(105.59,698.22)	351.14	(117.44,782.56)	390.24	(145.65,800.5)	431.63	(177.01,894.05)
Oman	3.42	(1.19,7.51)	10.32	(3.82,22.21)	17.24	(6.34,35.93)	24.09	(8.66,51.97)	30.08	(11.42,61.14)	34.82	(11.18,79.88)	43.13	(13.84,98.57)	55.18	(15.95,146.8)	94.77	(31.47,217.46)	160.19	(45.79,423.49)	213.21	(77.72,491.34)	257.16	(79.65,574.08)	289.02	(99.21,621.99)	311.47	(99.93,723.84)	346.63	(116.73,799.79)	392.90	(128.73,856.31)	433.74	(164.64,909.29)	482.17	(192.82,964.79)
Palestine	3.4	(1.23,7.38)	10.40	(3.83,23.22)	17.25	(6.38,38.27)	24.2	(9.24,53.67)	30.64	(11.59,62.87)	36.75	(11.62,86.81)	46.66	(14.23,107.91)	60.29	(17.24,161.93)	101.9	(33.96,238.36)	170.63	(48.65,432.43)	224.33	(81.38,510.84)	262.39	(84.65,576.69)	292.39	(98.97,639.73)	312.65	(101.53,721.72)	347.32	(118.76,802.16)	400.17	(133.72,866.05)	450.69	(170.58,936.62)	495.76	(189.64,1000.6)
Qatar	3.31	(1.22,7.04)	10.29	(3.83,22.14)	17.15	(6.3,36.57)	24.05	(9.14,52.12)	28.96	(10.73,61.52)	33.86	(10.96,77.91)	42.21	(13.13,98.59)	52.73	(15.39,138.83)	90.38	(30.77,207.62)	152.48	(41.44,391.12)	204.52	(73.58,463.19)	247.86	(78.45,562.23)	277.28	(97.23,604.72)	295.06	(96.27,699.71)	329.22	(110.13,763.19)	376.77	(124.87,813.74)	416.96	(158,882.77)	467.69	(181.5,940.76)
Saudi Arabia	3.38	(1.24,7.35)	10.27	(3.73,23.23)	17.09	(6.4,36.28)	23.83	(8.96,50.95)	30.17	(11.17,62.7)	35.92	(11.22,83.69)	44.9	(13.86,103.84)	56.83	(15.88,152.9)	95.54	(31.34,226.16)	161.64	(45.8,419.84)	216.14	(79.53,489.68)	256.43	(83.46,571.28)	284.94	(95.38,617.27)	298.59	(95.75,700.45)	327.03	(110.67,749.18)	370.24	(125.88,801.06)	415.32	(157.02,877.41)	465.99	(183.76,939.36)
Syrian Arab Republic	2.66	(0.96,5.79)	8.16	(3.01,17.68)	13.51	(5,29.16)	18.95	(7.15,41.91)	24.46	(9.06,51.72)	30.17	(9.25,71.34)	38.7	(12.85,86.54)	48.88	(14.08,127.39)	81.2	(26.59,190.42)	136.03	(38.45,355.57)	179.66	(67.06,412.79)	211.50	(68.71,460.84)	235.57	(79.51,514.99)	250.55	(79.65,588.87)	278.93	(94.63,627.97)	318.36	(107.46,701.13)	354.65	(130.2,764.8)	385.92	(146.82,827.11)
Türkiye	4.26	(1.6,8.98)	12.73	(4.75,26.91)	21.39	(8.06,45.12)	29.74	(11.12,62.7)	37.82	(14.69,79.41)	45.22	(14.6,101.67)	57.02	(18.29,129.88)	73.20	(20.95,194.09)	124.33	(42.05,288.72)	210.09	(61.1,521.13)	276.94	(99.48,617.72)	325.57	(103.16,714.84)	360.69	(118.92,800.55)	382.86	(127.65,865.58)	421.97	(144.96,956.96)	476.15	(160.6,1026.2)	521.17	(195.45,1068.44)	550.75	(229.8,1104.26)
United Arab Emirates	3.35	(1.25,7.28)	9.89	(3.58,21.47)	16.54	(6.2,35.77)	23.08	(8.95,49.76)	29.49	(10.9,61.42)	35.25	(11.06,82.16)	37.83	(12.27,85.02)	49.35	(14.23,130.42)	85.5	(27.99,202.2)	139.05	(39.6,375.02)	188.87	(68.04,436.68)	228.45	(71.68,510.07)	258.69	(86.82,571.2)	267.95	(87.19,632.52)	294.26	(97.11,685.29)	326.58	(112.31,698.8)	358.86	(132.05,737.45)	399.21	(152.79,848.67)
Yemen	3.35	(1.22,7.29)	10.34	(3.97,22.31)	17.36	(6.51,37.46)	24.16	(9.27,52.82)	30.71	(11.92,63.73)	37.12	(11.8,87.58)	47.1	(15.21,105.14)	60.53	(17.17,159.32)	101.59	(33.61,234.6)	169.96	(48.85,436.12)	226.73	(82.62,507.02)	270.03	(84.51,582.81)	299.65	(101.64,656.09)	316.36	(104.31,744.89)	347.49	(117.78,814.75)	398.62	(131.65,861.98)	442.68	(167.12,931.58)	485.18	(190.62,987.82)
Central Europe	1.59	(0.56,3.69)	4.82	(1.71,11.21)	8.05	(2.94,18.7)	11.3	(4.05,26.23)	15.21	(5.5,32.5)	19.75	(5.94,46.19)	27.66	(8.94,65.38)	39.05	(10.94,103.78)	60.03	(19.89,138.6)	90.81	(25.54,235.25)	122.58	(45.06,280.03)	154.92	(47.65,346.37)	183.94	(62.7,402.02)	207.73	(64.34,500.31)	232.70	(76.53,542.72)	253.44	(86.56,564.73)	307.88	(112.49,646.91)	406.10	(161.9,855.28)
Albania	1.63	(0.56,3.85)	4.98	(1.71,11.18)	8.33	(3.02,18.33)	11.62	(4.17,25.57)	14.95	(5.38,32.33)	18.34	(5.62,43.61)	25.76	(8.36,62.01)	36.94	(10.47,95.29)	58.37	(19.51,133.44)	90.57	(25.24,236.39)	121.82	(44.47,276.44)	151.26	(46,342.42)	178.98	(59.69,396.59)	204.53	(62.91,488.98)	227.38	(73.66,520.75)	247.58	(82.44,559.04)	300.92	(109.99,627.07)	407.47	(156.81,866.24)
Bosnia and Herzegovina	3.27	(1.25,7.19)	9.78	(3.84,21.54)	16.39	(6.42,35.45)	22.98	(9.01,51.88)	29.27	(10.99,61.37)	35.31	(11.39,84.77)	49.32	(16.09,117.71)	71.45	(20.83,194.51)	114.62	(38.88,270.38)	178.16	(50.92,461.26)	238.79	(86.29,538.46)	295.10	(92.24,668.93)	344.58	(118.34,776.15)	387.19	(124.65,876.87)	427.22	(147.89,963.02)	461.69	(150.22,963.51)	523.86	(200.17,1084.93)	622.74	(266.01,1253.08)
Bulgaria	1.65	(0.55,3.74)	5.01	(1.76,11.62)	8.37	(3.02,19.81)	11.67	(4.19,27.69)	15.00	(5.5,31.96)	18.24	(5.66,43.23)	25.39	(8.27,59.77)	36.52	(10.19,95.48)	58.2	(19.2,132.78)	89.90	(24.73,237.7)	120.95	(44.09,276.62)	150.41	(45.9,334.99)	178.14	(60.7,390.04)	204.09	(61.96,495.92)	227.61	(72.66,530.6)	246.79	(82.11,555.01)	300.38	(106.71,636.38)	404.89	(149.94,874.17)
Croatia	1.51	(0.53,3.41)	4.65	(1.66,10.27)	7.76	(2.64,18.08)	10.8	(3.85,24.38)	13.47	(5.08,29.54)	15.79	(4.71,38.16)	21.5	(6.88,50.32)	30.62	(8.29,81.26)	49.4	(16.34,116.77)	77.38	(21.25,200.03)	105.23	(38.7,240.61)	132.45	(40.22,292.62)	157.46	(53.36,340.11)	179.29	(56.2,414.58)	199.26	(64.87,454.07)	213.07	(71.97,484.32)	260.59	(91.15,544.14)	362.95	(141.91,794.4)
Czechia	1.43	(0.45,3.4)	4.33	(1.43,10.28)	7.22	(2.58,16.37)	10.07	(3.66,22.82)	12.89	(4.65,27.53)	15.65	(4.77,38.25)	21.61	(7.07,51.06)	31.07	(8.68,82.45)	49.26	(16.09,113.38)	75.84	(21.41,201.19)	101.71	(36.38,231.02)	126.41	(39.12,287.17)	150.12	(50.06,326.67)	172.54	(54.14,413.24)	191.93	(63.75,455.53)	207.61	(71.92,458.84)	253.72	(91.27,529.79)	358.34	(147.36,775.43)
Hungary	1.28	(0.39,3.13)	3.92	(1.3,9.05)	6.58	(2.34,14.98)	9.25	(3.2,21.53)	11.83	(4.31,25.72)	14.48	(4.39,33.94)	20.21	(6.46,47.26)	28.81	(8.16,78.69)	45.6	(15.71,107.49)	70.30	(19.08,180.11)	94.60	(34.28,212.1)	118.65	(37.17,258.9)	141.22	(47.57,308.95)	162.08	(49.74,391.64)	180.44	(59.89,429.69)	195.74	(67.16,436.29)	239.36	(85.52,503.95)	335.94	(135.58,734.9)
Montenegro	1.62	(0.56,3.77)	4.95	(1.74,11.06)	8.26	(2.84,19.13)	11.63	(4.07,25.98)	14.86	(5.38,32.5)	18.23	(5.56,44.82)	25.31	(8.08,59.05)	36.22	(10.24,96.31)	57.91	(19.37,132.61)	90.43	(24.71,228.89)	121.21	(43.9,274.2)	149.77	(45.78,337.19)	176.92	(59.75,390.6)	202.20	(61.74,491.03)	226.51	(74.41,540.42)	245.65	(81.83,551.9)	298.90	(104.28,629.44)	400.98	(147.44,866.71)
North Macedonia	1.65	(0.6,3.84)	4.99	(1.72,11.38)	8.35	(3.01,19.05)	11.64	(4.14,26.03)	15.00	(5.39,32.42)	18.22	(5.48,44.01)	25.49	(8.2,61.28)	36.55	(9.89,97.56)	58.17	(19.31,134.96)	90.19	(25.25,237.41)	121.00	(43.79,281.52)	149.65	(47.03,329.63)	176.41	(59.26,387.73)	201.14	(61.22,488.24)	224.55	(72.41,526.25)	244.55	(82.51,547.83)	296.99	(107.22,614.6)	390.46	(139.79,857.67)
Poland	1.57	(0.54,3.77)	4.71	(1.62,11.23)	7.88	(2.73,18.7)	11.01	(3.87,26.47)	16.16	(5.63,34.13)	23.25	(6.84,54.37)	32.75	(10.6,76.21)	44.59	(12.91,119.04)	66.77	(22.31,156.37)	99.00	(28.23,254.36)	133.26	(49.16,305.05)	169.29	(52.03,370.07)	200.40	(67.37,435.14)	225.99	(70.06,558.81)	259.18	(85.78,602.52)	298.20	(100,672.73)	347.89	(127.13,736.18)	429.51	(166.91,891.17)
Romania	1.65	(0.56,3.78)	5.03	(1.69,11.58)	8.36	(3.08,18.88)	11.71	(4.05,26.8)	15.02	(5.44,32.41)	18.28	(5.57,42.57)	25.44	(7.99,60.51)	36.57	(10.1,95.39)	58.26	(19.25,133.25)	90.12	(25.02,239.9)	120.93	(43.95,279.77)	150.81	(46.39,334.31)	179.20	(61.4,395.3)	205.15	(62.23,503.42)	228.61	(73.54,531.58)	247.86	(84.05,555.14)	301.81	(108.22,639.72)	413.33	(161.89,879.94)
Serbia	1.66	(0.57,3.66)	4.92	(1.73,10.92)	8.15	(2.95,18.81)	11.5	(3.99,25.76)	14.91	(5.35,30.99)	18.28	(5.48,43.24)	25.65	(8.04,60.79)	36.50	(9.84,97.41)	58.23	(19.05,131.55)	90.34	(24.84,229.59)	121.18	(44.54,275.95)	150.65	(45.9,329.7)	177.94	(59.95,395.94)	203.31	(61.52,474.99)	225.91	(74.83,529.13)	244.45	(81.62,547.78)	297.18	(109.36,632.43)	413.01	(169.96,866.89)
Slovakia	1.2	(0.35,2.82)	3.66	(1.17,8.82)	6.12	(2.03,14.09)	8.54	(2.82,19.74)	11.15	(4.02,24.27)	13.95	(4.3,32.33)	19.49	(6.12,46.48)	27.74	(7.63,74.62)	43.66	(14.24,99.04)	67.12	(18.78,174.15)	89.97	(32.65,205.26)	111.62	(34.75,246.98)	131.64	(44.21,290.61)	150.06	(47.78,360.06)	166.37	(54.57,386.06)	179.71	(62.58,403.39)	220.05	(77.67,464.19)	313.86	(126.66,714.08)
Slovenia	1.85	(0.61,4.27)	5.61	(1.92,12.56)	9.42	(3.18,21.78)	13.08	(4.69,29.11)	17.52	(6.35,38.11)	22.66	(6.77,53.6)	32.47	(10.59,76.22)	46.73	(13.02,125.24)	73.11	(24.44,166.29)	111.19	(31.33,281.04)	147.57	(53.98,329.82)	182.24	(56.87,413.73)	215.21	(71.21,472.09)	245.51	(76.26,585.23)	273.78	(92.67,630.11)	296.92	(98.93,651.46)	347.56	(126.67,736.98)	443.81	(183.9,912.2)
Eastern Europe	3.09	(1.14,6.73)	9.10	(3.45,19.63)	15.07	(5.63,32.86)	21.1	(7.89,45.82)	30.82	(11.02,63.01)	43.93	(13.65,102.84)	61.25	(19.68,142.83)	80.91	(23.3,216.11)	153.51	(53.9,342.54)	276.34	(82.4,675.93)	360.92	(137.8,799.1)	416.94	(140.69,908.12)	429.77	(148.14,904.15)	400.91	(140.29,875.69)	422.62	(146.22,944.25)	477.82	(168.79,989.12)	527.90	(195.78,1090.95)	543.87	(221.6,1100.15)
Belarus	2.49	(0.85,5.74)	7.39	(2.65,16.51)	12.4	(4.38,27.77)	17.24	(6.27,37.57)	23.00	(8.13,50.02)	29.32	(9.24,66.99)	36.73	(11.56,86.34)	45.05	(13.26,120.28)	73.69	(23.91,173.7)	121.76	(33.64,320.86)	171.07	(62,391.15)	222.34	(70.73,500.68)	251.93	(84.24,536.21)	259.41	(85.28,622.99)	297.60	(101.71,668.23)	364.63	(122.47,779.91)	411.49	(150.93,882.78)	452.12	(175.69,939.75)
Estonia	1.7	(0.52,3.78)	5.12	(1.68,11.99)	8.55	(2.91,19.33)	12	(4.11,26.38)	16.30	(5.69,36.4)	21.32	(6.58,49.1)	26.88	(8.2,61.9)	32.82	(8.95,89.95)	53.66	(17.82,125.78)	88.90	(24.53,222.32)	125.21	(47.38,281.2)	162.25	(51.11,355.8)	183.49	(62,401.72)	188.58	(61.93,458.05)	215.29	(71.42,481.23)	262.08	(85.84,600.76)	299.48	(106.98,642.65)	343.62	(137.62,767.25)
Latvia	2.88	(1.06,6.25)	8.58	(3.09,19.31)	14.34	(5.33,31.3)	20.12	(7.44,45.08)	26.41	(9.74,56.8)	33.36	(10.32,79.17)	41.97	(12.91,94.98)	52.36	(15.41,137.45)	85.72	(28.37,198.65)	141.19	(38.99,375.6)	196.64	(73.03,450.74)	251.92	(79.86,549.55)	281.57	(97.29,606)	285.06	(92.01,666.55)	319.37	(105.86,724.2)	381.30	(127.96,859.51)	423.27	(160.52,928.75)	457.94	(178.07,936.45)
Lithuania	2.46	(0.89,5.72)	7.37	(2.63,16.17)	12.33	(4.59,27.88)	17.21	(6.45,38.27)	22.83	(8.45,49.68)	29.23	(9,68.49)	36.53	(11.52,83.25)	45.01	(13.14,116.5)	73.24	(23.48,174.44)	120.83	(33.33,313.87)	170.25	(63.64,386.27)	221.43	(67.58,479.8)	251.24	(87.12,533.77)	258.56	(82.25,637.09)	296.51	(99.76,663.04)	361.93	(121.13,792.21)	408.94	(151.58,858.82)	448.77	(178.34,918.99)
Republic of Moldova	2.46	(0.82,5.45)	7.41	(2.63,16.48)	12.32	(4.59,26.74)	17.29	(6.34,38.28)	22.97	(8.11,48.99)	29.38	(9.12,69.41)	36.98	(12.01,86.17)	45.26	(13.01,117.09)	74.22	(24.78,171.39)	122.97	(33.91,324.57)	172.28	(62.95,403.32)	222.33	(68.73,479.29)	252.06	(88.6,538.11)	260.42	(81.89,634.07)	299.09	(97.64,669.21)	366.40	(123.93,795.43)	413.54	(150.13,875.8)	457.25	(185.44,944.12)
Russian Federation	3.39	(1.27,7.34)	10.08	(3.76,21.31)	16.85	(6.35,36.18)	23.56	(8.92,50.33)	34.87	(12.66,70.96)	50.62	(15.84,119.18)	70.58	(22.81,164.82)	94.62	(26.96,252.61)	187.35	(66.14,417.61)	347.66	(105.23,851.24)	455.13	(174.31,1007.58)	509.71	(174.5,1111.39)	510.77	(175.51,1078.62)	462.23	(162.47,996.84)	476.74	(166.23,1043.81)	550.75	(201.61,1110.21)	590.46	(221.11,1196.33)	592.23	(244.23,1196.73)
Ukraine	1.99	(0.68,4.61)	5.84	(2.11,13.52)	9.79	(3.43,22.76)	13.77	(4.88,31.53)	20.53	(7.27,44.43)	30.12	(9.29,69.72)	39.83	(12.85,89.58)	49.65	(15,132.47)	74.07	(24.4,167.7)	112.69	(32.08,291.06)	157.82	(57.12,357.24)	210.17	(67.26,466.28)	244.47	(84.85,520.19)	260.35	(80.81,614.57)	299.85	(97.59,682.41)	363.42	(121.29,781.1)	407.07	(149.52,871.62)	444.01	(171.37,919.16)
Western Europe	1.48	(0.49,3.5)	4.48	(1.53,10.79)	7.47	(2.5,17.75)	10.42	(3.47,24.88)	13.98	(5.07,30.44)	18.18	(5.55,42.43)	23.92	(7.28,55.82)	31.09	(8.83,84.08)	57.29	(18.61,133.59)	102.40	(28.77,267.2)	143.44	(53.56,325.75)	180.12	(55.87,401.78)	201.01	(68.91,433.8)	206.33	(65.69,491.26)	217.44	(69.99,516.26)	234.42	(80.54,522.35)	233.19	(81.17,519.12)	225.57	(92.69,521.64)
Cyprus	1.49	(0.48,3.59)	4.56	(1.52,11.09)	7.61	(2.66,18.25)	10.64	(3.52,25.71)	13.74	(4.96,29.5)	16.87	(5.11,39.09)	21.77	(6.76,50.55)	28.46	(7.77,78.06)	54.89	(18.25,129.47)	100.81	(28.6,253.67)	140.91	(53.26,320.29)	174.63	(55.73,380.07)	193.08	(66.73,421.42)	196.40	(62.12,463.11)	206.32	(68.29,470.14)	222.51	(75.85,509.97)	220.33	(79.12,498.05)	203.41	(74.24,495.61)
Greece	1.49	(0.49,3.45)	4.57	(1.49,10.51)	7.65	(2.52,18.13)	10.68	(3.55,24.26)	13.82	(4.8,29.16)	17.02	(5.28,40.15)	21.87	(6.71,50.21)	28.38	(7.65,77.48)	54.65	(17.49,127.38)	100.39	(27.63,264.61)	140.74	(53,313.5)	174.89	(53.88,394.19)	195.08	(66.64,435.27)	200.84	(63.08,480.42)	211.73	(65.05,498.96)	228.14	(80.05,511.72)	227.66	(78.2,512.81)	208.25	(85.05,505.46)
Israel	1.49	(0.47,3.73)	4.59	(1.48,10.61)	7.65	(2.61,17.43)	10.66	(3.59,24.08)	13.83	(4.81,29.67)	16.99	(5.13,38.79)	21.82	(6.74,50.73)	28.27	(7.51,77.85)	54.63	(17.88,127.74)	100.61	(28.44,264.16)	140.82	(51.52,316.62)	174.99	(55.43,390.04)	194.45	(66.5,430.45)	198.59	(61.91,470.12)	208.43	(67.84,480.61)	225.94	(77.96,499.37)	225.16	(77.22,507.04)	210.41	(87.08,493.88)
