# Supplementary material for: Age, Gender, and Socio-demographic Disparities in Near Vision Loss: A Global Burden of Disease Study Focusing on Belt and Road Countries
Source: Research Square preprint supplement (doi:10.21203/rs.3.rs-6582843/v1), 2025-06-09
Supplement: Supplementary file 11 [file bdead50f8402c8848297e78a.xlsx]

## Sheet: ASR prevalence
	AAPC from 1990 to 2021 in male			AAPC from 1990 to 2021 in female			AAPC from 1990 to 2021 in both genders
Global/Regions/Countries	AAPC 95%CI	P-Value		AAPC 95%CI	P-Value		AAPC 95%CI	P-Value
Global	1.52(1.35,1.70)	0		1.44(1.28,1.60)	0		1.47(1.31,1.64)	0
SDI Regions
Low SDI	1.10(0.94,1.27)	0		0.93(0.78,1.07)	0		1.01(0.86,1.17)	0
Low-middle SDI	1.61(1.35,1.88)	0		1.35(1.13,1.58)	0		1.48(1.24,1.73)	0
Middle SDI	1.55(1.36,1.74)	0		1.44(1.27,1.61)	0		1.49(1.31,1.68)	0
High-middle SDI	1.49(1.30,1.68)	0		1.38(1.19,1.58)	0		1.40(1.22,1.60)	0
High SDI	0.53(0.45,0.61)	0		0.48(0.40,0.55)	0		0.48(0.39,0.56)	0
East Asia
China	1.76(1.53,1.99)	0		1.72(1.50,1.94)	0		1.74(1.51,1.97)	0
Central Asia
Armenia	-0.01(-0.02,0.00)	0.011998		-0.02(-0.03,-0.01)	0		-0.03(-0.03,-0.02)	0
Azerbaijan	0.00(-0.01,0.00)	0.153169		-0.02(-0.03,-0.01)	0		-0.04(-0.04,-0.03)	0
Georgia	0.20(-0.04,0.44)	0.090782		0.07(-0.12,0.26)	0.473105		0.10(-0.10,0.31)	0.331934
Kazakhstan	0.16(0.02,0.30)	0.020796		0.27(0.05,0.48)	0.014797		0.20(0.02,0.38)	0.028794
Kyrgyzstan	-0.01(-0.02,0.00)	0.175165		-0.01(-0.01,0.00)	0.021196		-0.03(-0.03,-0.02)	0
Mongolia	-0.01(-0.03,0.00)	0.057988		-0.01(-0.01,0.00)	0.05199		-0.01(-0.02,0.00)	0.015997
Tajikistan	-0.01(-0.02,0.00)	0.095181		0.00(-0.01,0.00)	0.738652		-0.04(-0.05,-0.04)	0
Turkmenistan	-0.02(-0.03,-0.01)	0		-0.01(-0.02,-0.01)	0		-0.03(-0.04,-0.02)	0
Uzbekistan	-0.02(-0.03,-0.02)	0		-0.02(-0.02,-0.01)	0		-0.04(-0.05,-0.04)	0
South Asia
Bangladesh	0.48(0.09,0.86)	0.014797		0.51(0.09,0.92)	0.016397		0.61(0.19,1.03)	0.007998
Bhutan	-0.02(-0.03,-0.01)	0		-0.03(-0.04,-0.02)	0		-0.03(-0.04,-0.01)	0.0008
India	2.80(2.34,3.27)	0		2.43(2.01,2.85)	0		2.61(2.18,3.06)	0
Nepal	2.20(1.77,2.64)	0		2.30(1.80,2.80)	0		2.27(1.81,2.73)	0
Pakistan	0.50(0.13,0.87)	0.009598		0.37(0.08,0.65)	0.010798		0.45(0.13,0.77)	0.008798
Southeast Asia
Cambodia	-0.02(-0.03,-0.01)	0		-0.02(-0.03,-0.01)	0		-0.03(-0.04,-0.03)	0
Indonesia	0.47(0.31,0.63)	0		0.44(0.29,0.60)	0		0.45(0.30,0.60)	0
Lao People's Democratic Republic	0.12(0.00,0.23)	0.041992		0.08(-0.01,0.17)	0.085983		0.10(0.00,0.21)	0.055589
Malaysia	0.22(0.03,0.40)	0.021996		0.30(0.05,0.55)	0.014397		0.26(0.05,0.47)	0.015597
Maldives	-0.04(-0.05,-0.03)	0		-0.04(-0.05,-0.04)	0		-0.05(-0.06,-0.04)	0
Myanmar	0.08(-0.01,0.18)	0.069986		0.20(0.03,0.37)	0.023595		0.16(0.03,0.30)	0.017996
Philippines	0.06(0.01,0.11)	0.017197		0.09(0.02,0.16)	0.011598		0.07(0.01,0.13)	0.013597
Sri Lanka	0.17(0.04,0.30)	0.011598		0.10(0.00,0.20)	0.05039		0.17(0.08,0.27)	0.002
Thailand	-0.02(-0.02,-0.01)	0		-0.02(-0.03,-0.01)	0		-0.02(-0.02,-0.01)	0
Viet Nam	0.15(0.03,0.27)	0.017596		0.17(0.02,0.32)	0.027994		0.13(0.00,0.26)	0.055189
High-income Asia pacific
Brunei Darussalam	-0.01(-0.03,0.00)	0.068786		0.00(-0.02,0.01)	0.705859		0.01(0.00,0.02)	0.10078
Singapore	-0.02(-0.03,-0.01)	0.0004		0.00(-0.01,0.01)	0.877425		-0.03(-0.04,-0.03)	0
North Africa and Middle East
Afghanistan	-0.01(-0.02,-0.01)	0		0.00(-0.01,0.00)	0.263547		0.01(0.00,0.02)	0.003199
Bahrain	0.00(-0.01,0.00)	0.168366		-0.03(-0.04,-0.02)	0		-0.06(-0.07,-0.06)	0
Egypt	0.47(0.30,0.65)	0		0.46(0.29,0.63)	0		0.45(0.28,0.63)	0
Iran (Islamic Republic of)	0.36(0.24,0.49)	0		0.31(0.21,0.41)	0		0.36(0.25,0.48)	0
Iraq	-0.03(-0.03,-0.02)	0		-0.03(-0.04,-0.02)	0		-0.04(-0.04,-0.03)	0
Jordan	-0.01(-0.01,0.00)	0		-0.02(-0.02,-0.01)	0.0004		-0.03(-0.04,-0.03)	0
Kuwait	-0.01(-0.02,-0.01)	0		-0.02(-0.03,-0.02)	0		0.05(0.03,0.07)	0
Lebanon	0.47(0.30,0.65)	0		0.48(0.31,0.65)	0		0.48(0.31,0.66)	0
Oman	-0.04(-0.04,-0.03)	0		-0.04(-0.05,-0.04)	0		-0.04(-0.04,-0.03)	0
Palestine	-0.02(-0.03,-0.01)	0		-0.04(-0.05,-0.03)	0		-0.06(-0.07,-0.05)	0
Qatar	-0.01(-0.02,0.00)	0.035993		-0.02(-0.03,-0.01)	0		-0.04(-0.05,-0.03)	0
Saudi Arabia	-0.02(-0.03,-0.02)	0		-0.03(-0.04,-0.02)	0		-0.03(-0.04,-0.03)	0
Syrian Arab Republic	0.45(0.28,0.62)	0		0.34(0.21,0.46)	0		0.41(0.25,0.57)	0
Turkey	0.53(0.40,0.66)	0		0.55(0.42,0.69)	0		0.54(0.41,0.68)	0
United Arab Emirates	0.15(0.04,0.26)	0.012398		0.34(0.04,0.63)	0.025195		0.02(-0.13,0.18)	0.738252
Yemen	-0.02(-0.03,-0.02)	0		-0.03(-0.04,-0.02)	0		-0.03(-0.04,-0.02)	0
Central Europe
Albania	-0.03(-0.04,-0.02)	0		-0.03(-0.03,-0.02)	0		-0.03(-0.04,-0.03)	0
Bosnia and Herzegovina	0.07(0.00,0.13)	0.039592		0.10(0.00,0.20)	0.04799		0.06(-0.02,0.14)	0.122775
Bulgaria	-0.02(-0.03,-0.01)	0		-0.03(-0.03,-0.02)	0		-0.02(-0.02,-0.01)	0
Croatia	0.29(0.06,0.52)	0.012398		0.19(0.02,0.36)	0.024795		0.22(0.01,0.43)	0.041192
Czechia	0.06(-0.01,0.13)	0.095181		0.13(0.02,0.25)	0.025595		0.06(-0.03,0.15)	0.162368
Hungary	0.34(0.08,0.60)	0.010398		0.22(0.04,0.39)	0.013997		0.28(0.05,0.50)	0.014397
Montenegro	-0.02(-0.03,-0.01)	0.0016		-0.03(-0.03,-0.02)	0		-0.04(-0.04,-0.03)	0
North Macedonia	-0.02(-0.03,-0.01)	0		-0.01(-0.02,0.00)	0.014397		-0.02(-0.03,-0.01)	0
Poland	-0.02(-0.03,-0.02)	0		-0.03(-0.04,-0.02)	0		-0.04(-0.04,-0.03)	0
Romania	-0.02(-0.03,-0.02)	0		-0.02(-0.03,-0.01)	0		-0.02(-0.03,-0.01)	0
Serbia	-0.03(-0.04,-0.02)	0		-0.03(-0.04,-0.02)	0		-0.04(-0.04,-0.03)	0
Slovakia	0.02(-0.11,0.15)	0.814237		0.09(-0.06,0.23)	0.240352		0.05(-0.09,0.19)	0.491502
Slovenia	0.14(0.03,0.26)	0.013597		0.17(0.00,0.34)	0.047191		0.19(0.05,0.33)	0.009198
Eastern Europe
Belarus	-0.01(-0.02,0.00)	0.039992		0.00(-0.01,0.00)	0.321936		-0.01(-0.01,0.00)	0
Estonia	0.17(0.00,0.35)	0.053189		0.32(0.07,0.57)	0.011998		0.24(0.03,0.44)	0.020796
Latvia	0.18(0.05,0.31)	0.009598		0.20(0.03,0.36)	0.017197		0.21(0.06,0.36)	0.009598
Lithuania	-0.02(-0.03,-0.01)	0		-0.02(-0.02,-0.02)	0		-0.02(-0.02,-0.02)	0
Republic of Moldova	0.00(-0.01,0.01)	0.807039		0.00(-0.01,0.01)	0.991402		0.00(0.00,0.00)	0.613477
Russian Federation	1.99(1.49,2.50)	0		1.92(1.45,2.39)	0		1.93(1.43,2.43)	0
Ukraine	0.20(0.05,0.34)	0.009998		0.12(0.01,0.23)	0.037193		0.15(0.02,0.27)	0.024795
Western Europe
Cyprus	-0.04(-0.04,-0.03)	0		0.00(-0.01,0.01)	0.80144		-0.02(-0.03,-0.02)	0
Greece	-0.03(-0.04,-0.02)	0		0.01(0.00,0.02)	0.014797		-0.01(-0.02,0.00)	0.007598
Israel	-0.02(-0.03,-0.01)	0		-0.01(-0.02,0.00)	0.0012		-0.03(-0.03,-0.02)	0
