# Supplementary material for: Age, Gender, and Socio-demographic Disparities in Near Vision Loss: A Global Burden of Disease Study Focusing on Belt and Road Countries
Source: Research Square preprint supplement (doi:10.21203/rs.3.rs-6582843/v1), 2025-06-09
Supplement: Supplementary file 12 [file e05e5b908467b663ec3ed7fd.xlsx]

## Sheet: 特定年龄组 prevalence
	AAPC among people aged 0-14 years			AAPC among people aged 15-49 years			AAPC among people aged 50-74 years			AAPC among people aged 75+ years
Global/Regions/Countries	AAPC 95%CI	P-Value		AAPC 95%CI	P-Value		AAPC 95%CI	P-Value		AAPC 95%CI	P-Value
Global	0.13(0.07,0.19)	0.0004		2.45(2.22,2.69)	0		1.45(1.28,1.63)	0		0.13(0.05,0.21)	0.0024
SDI Regions
Low SDI	0.33(0.30,0.37)	0		1.34(1.14,1.55)	0		1.02(0.84,1.20)	0		0.13(0.09,0.18)	0
Low-middle SDI	0.46(0.40,0.53)	0		2.62(2.25,2.99)	0		1.26(1.02,1.51)	0		0.27(0.20,0.34)	0
Middle SDI	-0.06(-0.20,0.09)	0.39912		2.77(2.53,3.00)	0		1.61(1.39,1.84)	0		0.00(-0.10,0.11)	0.987802
High-middle SDI	-0.65(-0.86,-0.44)	0		2.62(2.34,2.90)	0		1.63(1.45,1.82)	0		-0.17(-0.29,-0.05)	0.005999
High SDI	-0.22(-0.29,-0.15)	0		0.73(0.59,0.87)	0		0.68(0.59,0.76)	0		-0.18(-0.21,-0.15)	0
East Asia
China	-0.59(-0.86,-0.32)	0		3.53(3.23,3.84)	0		2.12(1.85,2.38)	0		-0.70(-0.86,-0.53)	0
Central Asia
Armenia	-0.26(-0.54,0.02)	0.062787		0.34(0.17,0.52)	0.0004		-0.09(-0.33,0.14)	0.380324		-0.05(-0.13,0.04)	0.267546
Azerbaijan	-0.11(-0.37,0.16)	0.373125		0.60(0.44,0.77)	0		-0.35(-0.60,-0.10)	0.004399		-0.16(-0.23,-0.09)	0
Georgia	-0.19(-0.40,0.03)	0.095581		0.83(0.68,0.99)	0		-0.08(-0.29,0.14)	0.453109		0.15(-0.01,0.30)	0.062787
Kazakhstan	-0.71(-1.11,-0.31)	0		0.85(0.50,1.20)	0		0.20(0.02,0.37)	0.026795		-0.30(-0.42,-0.17)	0
Kyrgyzstan	-0.24(-0.46,-0.02)	0.035593		0.37(0.26,0.47)	0		-0.42(-0.61,-0.23)	0		-0.05(-0.10,0.00)	0.037592
Mongolia	-0.42(-0.69,-0.15)	0.002799		0.77(0.74,0.81)	0		-0.33(-0.41,-0.24)	0		-0.04(-0.07,-0.02)	0
Tajikistan	-0.05(-0.23,0.14)	0.579884		0.41(0.34,0.49)	0		-0.43(-0.63,-0.22)	0		-0.15(-0.20,-0.11)	0
Turkmenistan	0.03(-0.08,0.14)	0.620676		0.51(0.40,0.63)	0		-0.31(-0.45,-0.16)	0		-0.03(-0.07,0.01)	0.159168
Uzbekistan	-0.16(-0.37,0.06)	0.136373		0.53(0.45,0.62)	0		-0.35(-0.51,-0.19)	0		-0.15(-0.20,-0.10)	0
South Asia
Bangladesh	0.38(0.29,0.48)	0		1.98(1.09,2.85)	0.0004		0.60(0.17,1.01)	0.008398		-0.37(-0.68,-0.07)	0.016397
Bhutan	0.13(0.06,0.20)	0.0008		0.63(0.52,0.75)	0		-0.01(-0.03,0.01)	0.394321		-0.10(-0.11,-0.09)	0
India	0.72(0.61,0.82)	0		4.31(3.67,4.96)	0		2.19(1.77,2.62)	0		0.36(0.21,0.51)	0
Nepal	0.63(0.50,0.76)	0		2.87(2.26,3.51)	0		2.63(2.09,3.17)	0		-0.53(-0.63,-0.42)	0
Pakistan	0.29(0.15,0.42)	0.0004		0.98(0.33,1.62)	0.005199		0.45(0.10,0.80)	0.011198		-0.27(-0.50,-0.05)	0.018796
Southeast Asia
Cambodia	0.09(-0.04,0.22)	0.191162		0.28(0.26,0.30)	0		-0.08(-0.10,-0.06)	0		0.00(-0.02,0.01)	0.743451
Indonesia	-0.45(-0.60,-0.31)	0		0.67(0.64,0.70)	0		0.71(0.49,0.93)	0		0.28(0.17,0.38)	0
Lao People's Democratic Republic	0.54(0.36,0.72)	0		1.10(0.42,1.78)	0.0024		-0.18(-0.22,-0.15)	0		-0.25(-0.43,-0.08)	0.004399
Malaysia	0.38(0.28,0.49)	0		0.51(0.32,0.71)	0		0.44(0.10,0.79)	0.011998		-0.08(-0.12,-0.04)	0
Maldives	0.02(-0.22,0.27)	0.847431		0.65(0.56,0.74)	0		-0.17(-0.29,-0.03)	0.014797		0.11(0.07,0.15)	0
Myanmar	0.25(0.01,0.49)	0.039192		1.38(0.94,1.84)	0		-0.01(-0.09,0.07)	0.772645		-0.23(-0.40,-0.06)	0.008798
Philippines	-0.54(-1.01,-0.08)	0.023995		-0.27(-0.68,0.13)	0.181964		0.52(0.12,0.93)	0.010798		0.29(0.07,0.50)	0.010398
Sri Lanka	0.42(-0.02,0.85)	0.058388		0.79(0.63,0.95)	0		0.22(0.08,0.36)	0.005199		0.05(0.00,0.11)	0.070386
Thailand	0.08(0.04,0.13)	0.0012		1.06(0.96,1.16)	0		0.02(-0.02,0.07)	0.279544		0.01(-0.01,0.03)	0.566687
Viet Nam	0.07(-0.05,0.19)	0.240752		1.59(1.09,2.08)	0		-0.33(-0.46,-0.20)	0		0.00(-0.05,0.05)	0.934213
High-income Asia pacific
Brunei Darussalam	0.28(0.18,0.38)	0		0.62(0.50,0.74)	0		0.01(0.00,0.02)	0.079584		0.07(0.03,0.10)	0.0004
Singapore	-0.14(-0.37,0.09)	0.182364		0.74(0.63,0.86)	0		-0.04(-0.05,-0.02)	0		-0.05(-0.06,-0.04)	0
North Africa and Middle East
Afghanistan	0.30(0.16,0.45)	0.0004		0.18(-0.15,0.51)	0.245551		0.03(-0.08,0.15)	0.583483		0.03(0.01,0.05)	0.0012
Bahrain	0.14(0.08,0.19)	0		0.54(0.45,0.63)	0		-0.24(-0.34,-0.13)	0		0.07(0.01,0.14)	0.030794
Egypt	-0.37(-0.48,-0.25)	0		0.43(0.31,0.55)	0		0.72(0.43,1.01)	0		0.17(0.11,0.24)	0
Iran (Islamic Republic of)	-0.34(-0.55,-0.14)	0.0008		1.22(0.97,1.48)	0		0.29(0.21,0.37)	0		0.63(0.33,0.93)	0.0008
Iraq	0.17(0.12,0.23)	0		0.47(0.41,0.52)	0		-0.07(-0.10,-0.05)	0		-0.07(-0.08,-0.05)	0
Jordan	0.22(0.13,0.32)	0		0.68(0.63,0.74)	0		-0.03(-0.10,0.04)	0.397121		-0.10(-0.13,-0.06)	0
Kuwait	0.05(-0.05,0.16)	0.29874		0.84(0.72,0.95)	0		-0.09(-0.15,-0.03)	0.0008		-0.01(-0.09,0.07)	0.714257
Lebanon	-0.11(-0.22,0.00)	0.052789		0.64(0.49,0.79)	0		0.50(0.37,0.62)	0		0.59(0.34,0.86)	0
Oman	-0.20(-0.42,0.02)	0.065587		0.21(0.07,0.34)	0.003599		-0.11(-0.12,-0.10)	0		-0.11(-0.14,-0.08)	0
Palestine	0.24(0.20,0.30)	0		0.32(0.30,0.35)	0		-0.23(-0.25,-0.21)	0		0.03(0.00,0.06)	0.078784
Qatar	-0.14(-0.29,0.00)	0.04879		-0.06(-0.30,0.17)	0.553089		-0.11(-0.18,-0.04)	0.0016		0.01(-0.03,0.06)	0.573885
Saudi Arabia	0.11(0.02,0.20)	0.016397		0.54(0.46,0.62)	0		-0.14(-0.15,-0.12)	0		-0.04(-0.09,0.00)	0.036793
Syrian Arab Republic	0.92(0.59,1.25)	0		2.01(1.38,2.66)	0		0.18(0.09,0.26)	0		-0.05(-0.14,0.05)	0.240752
Turkey	-0.31(-0.41,-0.21)	0		1.10(0.99,1.20)	0		0.63(0.48,0.78)	0		0.57(0.24,0.91)	0.0012
United Arab Emirates	0.00(-0.08,0.08)	0.926215		1.05(0.43,1.72)	0.002		0.14(-0.12,0.40)	0.281544		-0.89(-1.14,-0.64)	0
Yemen	0.06(-0.04,0.16)	0.254349		0.10(-0.03,0.23)	0.109978		-0.02(-0.03,0.00)	0.071186		-0.08(-0.10,-0.07)	0
Eastern Europe
Belarus	-0.35(-0.62,-0.08)	0.009598		0.42(0.30,0.54)	0		-0.09(-0.19,0.01)	0.065987		0.02(-0.04,0.09)	0.465107
Estonia	-0.30(-0.57,-0.02)	0.035993		0.25(0.20,0.31)	0		0.57(0.14,1.01)	0.009598		0.08(0.02,0.14)	0.007199
Latvia	-0.45(-0.81,-0.09)	0.017197		0.22(0.15,0.30)	0		0.40(0.17,0.63)	0.002		0.52(0.03,1.00)	0.039192
Lithuania	-0.18(-0.41,0.05)	0.09998		0.43(0.36,0.50)	0		-0.03(-0.08,0.02)	0.243951		0.00(-0.04,0.04)	0.935013
Republic of Moldova	-0.14(-0.36,0.08)	0.190362		0.40(0.26,0.54)	0		-0.05(-0.12,0.02)	0.163967		0.11(0.08,0.13)	0
Russian Federation	-0.42(-0.71,-0.13)	0.003599		2.85(2.27,3.44)	0		2.16(1.69,2.64)	0		0.53(0.41,0.65)	0
Ukraine	-0.15(-0.43,0.13)	0.253949		0.80(0.43,1.17)	0.0008		0.04(-0.06,0.14)	0.44871		-0.04(-0.09,0.00)	0.068386

## Sheet: 不同SDI
	AAPC among people aged 0-14 years		AAPC among people aged 15-49 years		AAPC among people aged 50-74 years		AAPC among people aged 75+ years
Low SDI	0.33(0.30,0.37)	0	1.34(1.14,1.55)	0	1.02(0.84,1.20)	0	0.13(0.09,0.18)	0
Low-middle SDI	0.46(0.40,0.53)	0	2.62(2.25,2.99)	0	1.26(1.02,1.51)	0	0.27(0.20,0.34)	0
Middle SDI	-0.06(-0.20,0.09)	0.39912	2.77(2.53,3.00)	0	1.61(1.39,1.84)	0	0.00(-0.10,0.11)	0.987802
High-middle SDI	-0.65(-0.86,-0.44)	0	2.62(2.34,2.90)	0	1.63(1.45,1.82)	0	-0.17(-0.29,-0.05)	0.005999
High SDI	-0.22(-0.29,-0.15)	0	0.73(0.59,0.87)	0	0.68(0.59,0.76)	0	-0.18(-0.21,-0.15)	0

## Sheet: 不同地区和国家
	AAPC of prevalence among people aged 0-14 years		AAPC of prevalence among people aged 15-49 years		AAPC of prevalence among people aged 50-74 years		AAPC of prevalence among people aged 75+ years
East Asia
China	-0.59(-0.86,-0.32)	0	3.53(3.23,3.84)	0	2.12(1.85,2.38)	0	-0.70(-0.86,-0.53)	0
Central Asia
Armenia	-0.26(-0.54,0.02)	0.062787	0.34(0.17,0.52)	0.0004	-0.09(-0.33,0.14)	0.380324	-0.05(-0.13,0.04)	0.267546
Azerbaijan	-0.11(-0.37,0.16)	0.373125	0.60(0.44,0.77)	0	-0.35(-0.60,-0.10)	0.004399	-0.16(-0.23,-0.09)	0
Georgia	-0.19(-0.40,0.03)	0.095581	0.83(0.68,0.99)	0	-0.08(-0.29,0.14)	0.453109	0.15(-0.01,0.30)	0.062787
Kazakhstan	-0.71(-1.11,-0.31)	0	0.85(0.50,1.20)	0	0.20(0.02,0.37)	0.026795	-0.30(-0.42,-0.17)	0
Kyrgyzstan	-0.24(-0.46,-0.02)	0.035593	0.37(0.26,0.47)	0	-0.42(-0.61,-0.23)	0	-0.05(-0.10,0.00)	0.037592
Mongolia	-0.42(-0.69,-0.15)	0.002799	0.77(0.74,0.81)	0	-0.33(-0.41,-0.24)	0	-0.04(-0.07,-0.02)	0
Tajikistan	-0.05(-0.23,0.14)	0.579884	0.41(0.34,0.49)	0	-0.43(-0.63,-0.22)	0	-0.15(-0.20,-0.11)	0
Turkmenistan	0.03(-0.08,0.14)	0.620676	0.51(0.40,0.63)	0	-0.31(-0.45,-0.16)	0	-0.03(-0.07,0.01)	0.159168
Uzbekistan	-0.16(-0.37,0.06)	0.136373	0.53(0.45,0.62)	0	-0.35(-0.51,-0.19)	0	-0.15(-0.20,-0.10)	0
South Asia
Bangladesh	0.38(0.29,0.48)	0	1.98(1.09,2.85)	0.0004	0.60(0.17,1.01)	0.008398	-0.37(-0.68,-0.07)	0.016397
Bhutan	0.13(0.06,0.20)	0.0008	0.63(0.52,0.75)	0	-0.01(-0.03,0.01)	0.394321	-0.10(-0.11,-0.09)	0
India	0.72(0.61,0.82)	0	4.31(3.67,4.96)	0	2.19(1.77,2.62)	0	0.36(0.21,0.51)	0
Nepal	0.63(0.50,0.76)	0	2.87(2.26,3.51)	0	2.63(2.09,3.17)	0	-0.53(-0.63,-0.42)	0
Pakistan	0.29(0.15,0.42)	0.0004	0.98(0.33,1.62)	0.005199	0.45(0.10,0.80)	0.011198	-0.27(-0.50,-0.05)	0.018796
Southeast Asia
Cambodia	0.09(-0.04,0.22)	0.191162	0.28(0.26,0.30)	0	-0.08(-0.10,-0.06)	0	0.00(-0.02,0.01)	0.743451
Indonesia	-0.45(-0.60,-0.31)	0	0.67(0.64,0.70)	0	0.71(0.49,0.93)	0	0.28(0.17,0.38)	0
Lao People's Democratic Republic	0.54(0.36,0.72)	0	1.10(0.42,1.78)	0.0024	-0.18(-0.22,-0.15)	0	-0.25(-0.43,-0.08)	0.004399
Malaysia	0.38(0.28,0.49)	0	0.51(0.32,0.71)	0	0.44(0.10,0.79)	0.011998	-0.08(-0.12,-0.04)	0
Maldives	0.02(-0.22,0.27)	0.847431	0.65(0.56,0.74)	0	-0.17(-0.29,-0.03)	0.014797	0.11(0.07,0.15)	0
Myanmar	0.25(0.01,0.49)	0.039192	1.38(0.94,1.84)	0	-0.01(-0.09,0.07)	0.772645	-0.23(-0.40,-0.06)	0.008798
Philippines	-0.54(-1.01,-0.08)	0.023995	-0.27(-0.68,0.13)	0.181964	0.52(0.12,0.93)	0.010798	0.29(0.07,0.50)	0.010398
Sri Lanka	0.42(-0.02,0.85)	0.058388	0.79(0.63,0.95)	0	0.22(0.08,0.36)	0.005199	0.05(0.00,0.11)	0.070386
Thailand	0.08(0.04,0.13)	0.0012	1.06(0.96,1.16)	0	0.02(-0.02,0.07)	0.279544	0.01(-0.01,0.03)	0.566687
Viet Nam	0.07(-0.05,0.19)	0.240752	1.59(1.09,2.08)	0	-0.33(-0.46,-0.20)	0	0.00(-0.05,0.05)	0.934213
High-income Asia pacific
Brunei Darussalam	0.28(0.18,0.38)	0	0.62(0.50,0.74)	0	0.01(0.00,0.02)	0.079584	0.07(0.03,0.10)	0.0004
Singapore	-0.14(-0.37,0.09)	0.182364	0.74(0.63,0.86)	0	-0.04(-0.05,-0.02)	0	-0.05(-0.06,-0.04)	0
North Africa and Middle East
Afghanistan	0.30(0.16,0.45)	0.0004	0.18(-0.15,0.51)	0.245551	0.03(-0.08,0.15)	0.583483	0.03(0.01,0.05)	0.0012
Bahrain	0.14(0.08,0.19)	0	0.54(0.45,0.63)	0	-0.24(-0.34,-0.13)	0	0.07(0.01,0.14)	0.030794
Egypt	-0.37(-0.48,-0.25)	0	0.43(0.31,0.55)	0	0.72(0.43,1.01)	0	0.17(0.11,0.24)	0
Iran (Islamic Republic of)	-0.34(-0.55,-0.14)	0.0008	1.22(0.97,1.48)	0	0.29(0.21,0.37)	0	0.63(0.33,0.93)	0.0008
Iraq	0.17(0.12,0.23)	0	0.47(0.41,0.52)	0	-0.07(-0.10,-0.05)	0	-0.07(-0.08,-0.05)	0
Jordan	0.22(0.13,0.32)	0	0.68(0.63,0.74)	0	-0.03(-0.10,0.04)	0.397121	-0.10(-0.13,-0.06)	0
Kuwait	0.05(-0.05,0.16)	0.29874	0.84(0.72,0.95)	0	-0.09(-0.15,-0.03)	0.0008	-0.01(-0.09,0.07)	0.714257
Lebanon	-0.11(-0.22,0.00)	0.052789	0.64(0.49,0.79)	0	0.50(0.37,0.62)	0	0.59(0.34,0.86)	0
Oman	-0.20(-0.42,0.02)	0.065587	0.21(0.07,0.34)	0.003599	-0.11(-0.12,-0.10)	0	-0.11(-0.14,-0.08)	0
Palestine	0.24(0.20,0.30)	0	0.32(0.30,0.35)	0	-0.23(-0.25,-0.21)	0	0.03(0.00,0.06)	0.078784
Qatar	-0.14(-0.29,0.00)	0.04879	-0.06(-0.30,0.17)	0.553089	-0.11(-0.18,-0.04)	0.0016	0.01(-0.03,0.06)	0.573885
Saudi Arabia	0.11(0.02,0.20)	0.016397	0.54(0.46,0.62)	0	-0.14(-0.15,-0.12)	0	-0.04(-0.09,0.00)	0.036793
Syrian Arab Republic	0.92(0.59,1.25)	0	2.01(1.38,2.66)	0	0.18(0.09,0.26)	0	-0.05(-0.14,0.05)	0.240752
Turkey	-0.31(-0.41,-0.21)	0	1.10(0.99,1.20)	0	0.63(0.48,0.78)	0	0.57(0.24,0.91)	0.0012
United Arab Emirates	0.00(-0.08,0.08)	0.926215	1.05(0.43,1.72)	0.002	0.14(-0.12,0.40)	0.281544	-0.89(-1.14,-0.64)	0
Yemen	0.06(-0.04,0.16)	0.254349	0.10(-0.03,0.23)	0.109978	-0.02(-0.03,0.00)	0.071186	-0.08(-0.10,-0.07)	0
Central Europe
Albania	0.12(-0.10,0.35)	0.266747	0.45(0.27,0.63)	0	0.09(0.06,0.12)	0	-0.08(-0.10,-0.06)	0
Bosnia and Herzegovina	-0.07(-0.17,0.04)	0.184363	0.37(0.19,0.55)	0.0004	0.16(0.09,0.22)	0	0.18(-0.09,0.46)	0.189962
Bulgaria	-0.34(-0.52,-0.16)	0	0.37(0.25,0.49)	0	0.04(0.00,0.08)	0.071186	0.20(0.14,0.27)	0
Croatia	-0.37(-0.56,-0.18)	0	0.26(0.21,0.31)	0	0.35(0.03,0.67)	0.032394	0.36(-0.14,0.84)	0.127574
Czechia	-0.51(-0.72,-0.29)	0	0.48(0.19,0.77)	0.0012	0.21(-0.01,0.44)	0.063987	0.00(-0.07,0.06)	0.960208
Hungary	-0.16(-0.22,-0.10)	0	0.67(0.27,1.08)	0.0024	0.37(0.05,0.69)	0.025995	0.40(0.17,0.63)	0.0008
Montenegro	-0.10(-0.14,-0.06)	0	0.35(0.25,0.45)	0	0.02(-0.05,0.08)	0.617876	-0.22(-0.29,-0.16)	0
North Macedonia	-0.06(-0.17,0.05)	0.223955	0.39(0.33,0.45)	0	0.00(-0.06,0.06)	0.895421	-0.22(-0.37,-0.07)	0.003999
Poland	-0.35(-0.48,-0.21)	0	0.18(0.03,0.34)	0.020396	-0.04(-0.15,0.08)	0.483503	0.08(0.00,0.17)	0.059588
Romania	-0.24(-0.34,-0.14)	0	0.66(0.55,0.77)	0	0.04(-0.01,0.09)	0.119576	0.16(0.06,0.26)	0.002
Serbia	-0.07(-0.12,-0.01)	0.022795	0.24(0.16,0.31)	0	0.03(-0.01,0.07)	0.130774	0.10(-0.07,0.27)	0.244751
Slovakia	-0.19(-0.32,-0.07)	0.0024	0.74(0.42,1.08)	0	-0.16(-0.34,0.02)	0.074785	0.29(0.04,0.54)	0.023595
Slovenia	-0.35(-0.47,-0.22)	0	0.58(0.53,0.63)	0	0.37(0.11,0.63)	0.008398	0.13(0.00,0.26)	0.043991
Eastern Europe
Belarus	-0.35(-0.62,-0.08)	0.009598	0.42(0.30,0.54)	0	-0.09(-0.19,0.01)	0.065987	0.02(-0.04,0.09)	0.465107
Estonia	-0.30(-0.57,-0.02)	0.035993	0.25(0.20,0.31)	0	0.57(0.14,1.01)	0.009598	0.08(0.02,0.14)	0.007199
Latvia	-0.45(-0.81,-0.09)	0.017197	0.22(0.15,0.30)	0	0.40(0.17,0.63)	0.002	0.52(0.03,1.00)	0.039192
Lithuania	-0.18(-0.41,0.05)	0.09998	0.43(0.36,0.50)	0	-0.03(-0.08,0.02)	0.243951	0.00(-0.04,0.04)	0.935013
Republic of Moldova	-0.14(-0.36,0.08)	0.190362	0.40(0.26,0.54)	0	-0.05(-0.12,0.02)	0.163967	0.11(0.08,0.13)	0
Russian Federation	-0.42(-0.71,-0.13)	0.003599	2.85(2.27,3.44)	0	2.16(1.69,2.64)	0	0.53(0.41,0.65)	0
Ukraine	-0.15(-0.43,0.13)	0.253949	0.80(0.43,1.17)	0.0008	0.04(-0.06,0.14)	0.44871	-0.04(-0.09,0.00)	0.068386
Western Europe
Cyprus	-0.20(-0.33,-0.07)	0.0016	0.22(0.16,0.28)	0	-0.03(-0.06,0.00)	0.023995	-0.06(-0.11,0.00)	0.033993
Greece	-0.16(-0.25,-0.07)	0	0.69(0.62,0.76)	0	-0.02(-0.04,0.01)	0.221556	-0.04(-0.05,-0.02)	0
Israel	-0.11(-0.14,-0.08)	0	0.20(0.11,0.29)	0	-0.05(-0.12,0.01)	0.091982	0.00(-0.03,0.03)	0.976205
