# Supplementary material for: Age, Gender, and Socio-demographic Disparities in Near Vision Loss: A Global Burden of Disease Study Focusing on Belt and Road Countries
Source: Research Square preprint supplement (doi:10.21203/rs.3.rs-6582843/v1), 2025-06-09
Supplement: Supplementary file 13 [file e62a9cc79cacdaf896fdaf41.xlsx]

## Sheet: Sheet1
	ASR of prevalence in male		ASR of prevalence in female		difference	ASR of YLDs in male		ASR of YLDs in female		difference
Gobal/Regions/Countries	Rate	95%UI	Rate	95%UI		Rate	95%UI	Rate	95%UI
Global	12207.9	(9158.6,16145.29)	14615.5	(11218.52,18924.04)	2407.56	123.79	(55.56,236.63)	146.82	(65.62,279.7)	23.03
SDI Regions
Low SDI	13676.7	(10442.54,17489.11)	16632.3	(12873.72,21144.05)	2955.53	137.91	(61.33,262.29)	165.81	(74.62,309.63)	27.9
Low-middle SDI	14627.3	(10969.48,18650.42)	17820.3	(13707.79,22771.59)	3193.05	147.51	(66.52,275.4)	177.58	(79.28,332.65)	30.07
Middle SDI	14246.5	(10743.74,18843.57)	16473.3	(12621.19,21224.16)	2226.72	144.44	(64.83,277.92)	165.56	(74.19,314.96)	21.12
High-middle SDI	11723.6	(8728.78,15534.98)	13706.4	(10332.41,17913.89)	1982.78	119.06	(54,228.98)	138.12	(62.79,267.27)	19.06
High SDI	6180.78	(4520.68,8381.31)	7715.92	(5721.27,10240.03)	1535.14	62.62	(27.89,120.39)	77.58	(34.84,150.56)	14.96
East Asia	14579	(10750.96,19346.68)	16425.4	(12240.87,21630.83)	1846.42	148.66	(68.06,285.67)	166.40	(74.76,320.25)	17.74
China	14686.2	(10818.31,19478.74)	16551.7	(12325.68,21811.49)	1865.49	149.76	(68.57,287.99)	167.69	(75.42,322.33)	17.93
Central Asia	8240.85	(6106.64,11114.76)	8896.17	(6681.35,11719.72)	655.32	82.85	(35.97,163.61)	88.55	(38.89,169.82)	5.7
Armenia	8304.05	(6097.98,11059.52)	8976.55	(6722.45,11810.91)	672.5	83.59	(36.59,162.09)	89.35	(39.33,170.52)	5.76
Azerbaijan	8306.05	(6181.71,11022.44)	8963.84	(6722.43,11850.49)	657.79	83.89	(36.39,163.95)	89.40	(39.18,171.41)	5.51
Georgia	8835.26	(6430.13,11777.64)	9413.52	(6994.6,12411)	578.26	88.39	(38.74,174.22)	93.78	(41.09,180.4)	5.39
Kazakhstan	7746.28	(5758.72,10409.82)	8473.31	(6333.53,11124.36)	727.03	77.57	(33.94,153.22)	83.93	(37.18,161.77)	6.36
Kyrgyzstan	8359.86	(6102.16,11225.39)	9003.43	(6812.13,11886.85)	643.57	84.24	(36.92,167.26)	89.94	(38.92,172.66)	5.7
Mongolia	8360.38	(6128.87,11305.58)	9006.48	(6748.22,11968.33)	646.1	83.61	(36.92,164.82)	89.81	(38.76,170.53)	6.2
Tajikistan	8354.47	(6202.29,11214.09)	9020.99	(6769.62,12007.86)	666.52	84.20	(36.99,165.28)	90.09	(39.51,173.96)	5.89
Turkmenistan	8315.36	(6070.7,11200.43)	8974.77	(6749.81,11778.19)	659.41	83.79	(35.92,163.24)	89.68	(39.52,171.51)	5.89
Uzbekistan	8316.85	(6100.49,11148.84)	8979.38	(6683.86,11887.93)	662.53	83.68	(36.29,165.6)	89.44	(39.6,173.14)	5.76
South Asia	18869.5	(14001.56,24433.25)	22618.6	(17360.27,28646.9)	3749.13	190.69	(84.64,350.52)	225.33	(101.52,421.39)	34.64
Bangladesh	7009.99	(5115.08,9687.85)	14069.5	(10216.19,18989.64)	7059.5	70.88	(31.17,139.74)	140.22	(62.9,268.01)	69.34
Bhutan	10341.5	(7538.3,14400)	15213.6	(11076.34,20353.33)	4872.02	104.65	(46.42,204.75)	152.39	(69.28,293.99)	47.74
India	21691.3	(16060.84,28241.67)	24987	(19130.89,31603.3)	3295.66	219.24	(97.23,401.49)	249.07	(110.83,466.35)	29.83
Nepal	21378.8	(17043.93,25183.75)	24937.4	(20221.43,29202.38)	3558.62	216.14	(101.09,396.17)	249.29	(115.01,444.39)	33.15
Pakistan	6674.45	(4844.61,9179.74)	10999.5	(8001.1,15376.91)	4325.05	67.10	(28.93,131.53)	109.15	(48.47,215.41)	42.05
Southeast Asia	9835.15	(7408.56,12867.9)	11135.9	(8441.63,14602.67)	1300.78	99.33	(44.56,191.88)	111.74	(49.68,217.01)	12.41
Cambodia	6685.56	(4999.29,8987.12)	7983.92	(5922.06,10575.57)	1298.36	66.91	(30.4,132.23)	79.36	(35.78,152.78)	12.45
Indonesia	12442.1	(9319.87,16275.93)	14235.4	(10658.11,18492.63)	1793.32	125.56	(57.11,241.47)	142.85	(64.08,276.58)	17.29
Lao People's Democratic Republic	6258.67	(4707.5,8243.03)	5724.15	(4202.76,7606.53)	-534.52	63.00	(28.1,124.17)	57.20	(25.82,110.78)	-5.8
Malaysia	3717.61	(2728.34,4983.92)	4343.25	(3241,5805.39)	625.64	37.23	(16.72,74.02)	43.15	(19.45,83.88)	5.92
Maldives	6652.53	(5001.9,8841.34)	7899.66	(5804.29,10474.71)	1247.13	67.07	(29.57,132.64)	78.74	(35.84,152.84)	11.67
Myanmar	4490.9	(3335.56,5983.91)	5399.86	(3981.73,7218.3)	908.96	44.98	(20.01,89.01)	53.72	(24.48,103.74)	8.74
Philippines	18267.1	(13883.73,23626.99)	19006.7	(14577.26,24567.03)	739.6	185.25	(83.34,358.94)	191.04	(85.44,366.02)	5.79
Sri Lanka	6882	(5045.46,9282.12)	9476.7	(7131.21,12484.46)	2594.7	68.58	(30.98,136.63)	94.07	(42.48,178.77)	25.49
Thailand	6646.62	(4977.45,8862.72)	7907.07	(5787.91,10546.89)	1260.45	66.72	(29.36,130.8)	79.05	(35.61,152.41)	12.33
Viet Nam	4156.52	(3048.09,5566.36)	5739.68	(4229.15,7740.94)	1583.16	41.90	(19.09,82.39)	57.50	(25.68,112.34)	15.6
High-income Asia pacific	5947.2	(4284.57,8181.33)	7437.91	(5499.87,10155.75)	1490.71	60.57	(26.72,120.27)	75.55	(32.97,151.11)	14.98
Brunei Darussalam	5504.93	(3978.27,7768.64)	6898.61	(4989.22,9548.09)	1393.68	55.61	(24.31,107.55)	69.72	(30.89,136.78)	14.11
Singapore	5541.36	(3959.73,7679.46)	6894.23	(5029.21,9449.97)	1352.87	56.62	(24.83,110.92)	70.24	(30.96,141.8)	13.62
North Africa and Middle East	8974.26	(6700.48,11864.26)	12102.3	(9108.16,15951.71)	3128.07	90.01	(40.56,173.08)	120.12	(53.72,232.52)	30.11
Afghanistan	8608.81	(6419.09,11563.61)	11577.8	(8623.09,14975.21)	2969.01	84.95	(38.07,165.9)	113.60	(51.85,224.09)	28.65
Bahrain	8523.74	(6414.08,11395.73)	11403.5	(8607.97,15204.03)	2879.78	85.16	(37.61,166.33)	112.38	(49.87,215.89)	27.22
Egypt	10174.3	(7695.56,13578.01)	12763.1	(9543.44,16701.5)	2588.81	102.33	(44.97,197.55)	126.98	(57.02,247.27)	24.65
Iran (Islamic Republic of)	6673.25	(4990.44,8944.53)	10569.8	(7842.29,14024.05)	3896.57	66.78	(30,130.32)	104.68	(46.56,204.35)	37.9
Iraq	8539.93	(6464.53,11373)	11461.3	(8671.12,15018.12)	2921.33	84.45	(37.44,162.59)	113.26	(51.41,219.06)	28.81
Jordan	8510.81	(6422.18,11380.92)	11423	(8333.34,15212.43)	2912.14	85.48	(37.79,165.75)	113.05	(49.6,221.69)	27.57
Kuwait	8425.89	(6234.15,11221.39)	11349.5	(8396.6,14852)	2923.59	84.27	(37.16,162.9)	112.68	(50,217.09)	28.41
Lebanon	8232.44	(6120.86,11109.34)	9490.6	(7141.73,12403.48)	1258.16	81.92	(37,159.92)	93.79	(42.65,178.45)	11.87
Oman	8502.05	(6377.06,11358.09)	11406.7	(8593.84,15195.46)	2904.69	85.04	(37.78,167.58)	113.35	(50.71,218.61)	28.31
Palestine	8548.69	(6294.91,11445.1)	11443.6	(8533.45,15335.55)	2894.92	85.38	(37.59,166)	113.45	(51.51,221.78)	28.07
Qatar	8425.89	(6234.15,11221.39)	11349.5	(8396.6,14852)	2923.59	84.10	(37.1,160.91)	111.70	(49.59,214.93)	27.6
Saudi Arabia	8463.37	(6337.2,11353.55)	11351	(8407.3,14922.8)	2887.6	84.10	(37.36,163.78)	112.34	(50.03,214.33)	28.24
Syrian Arab Republic	6923.05	(5217.49,9281.79)	9043.88	(6771.82,12154.41)	2120.83	69.57	(31.17,136.12)	89.65	(40.49,174.79)	20.08
Türkiye	10735.9	(8003.7,14120.55)	13394.5	(10131.54,17640.65)	2658.58	108.39	(49.7,205.33)	133.54	(59.95,255.62)	25.15
United Arab Emirates	7425.04	(5506.64,9845.6)	12114.7	(9093.24,16167.24)	4689.67	74.33	(33.15,145.39)	119.75	(52.75,235.16)	45.42
Yemen	8595.32	(6360.34,11564.88)	11511.4	(8482.01,15233.22)	2916.04	86.36	(38.03,168.55)	113.85	(51.41,223.03)	27.49
Central Europe	5555.46	(4085.62,7462.61)	6526.29	(4892.36,8619.61)	970.83	55.43	(24.74,108.7)	65.02	(28.66,127.41)	9.59
Albania	5478.24	(3947.03,7298.32)	6354.63	(4783.77,8471.1)	876.39	54.95	(24.46,106.9)	63.60	(28.42,125.67)	8.65
Bosnia and Herzegovina	10384.1	(7632.72,13790.51)	12045.8	(9189.11,15909.3)	1661.62	103.76	(46.45,201.34)	120.17	(53.46,232.25)	16.41
Bulgaria	5442.53	(4039.63,7401.47)	6350.51	(4769.2,8386.19)	907.98	54.35	(24.12,105.12)	63.33	(28.05,123.98)	8.98
Croatia	3971.53	(2897.78,5312.35)	6237.45	(4583.89,8158.2)	2265.92	39.68	(17.67,77.41)	62.11	(28.41,120.34)	22.43
Czechia	4327.86	(3193.56,5844.87)	5674.51	(4231.83,7618.93)	1346.65	43.09	(19.04,83.34)	56.32	(25.29,109.95)	13.23
Hungary	4201.04	(3085.57,5613.69)	5101.54	(3763.21,6776.9)	900.5	41.98	(18.65,81.74)	50.75	(23.01,99.3)	8.77
Montenegro	5450.65	(3904.65,7285.67)	6315.05	(4663.23,8430.83)	864.4	54.49	(24.38,106.8)	62.90	(27.44,122.73)	8.41
North Macedonia	5445.71	(4043.96,7383.79)	6348.51	(4681.35,8469.31)	902.8	54.41	(24.48,106.65)	63.00	(28,121.68)	8.59
Poland	6182.78	(4517.43,8338.91)	7155.48	(5304.54,9615.41)	972.7	61.51	(27.4,120.68)	71.18	(31.17,138.22)	9.67
Romania	5442.53	(4039.63,7401.47)	6350.51	(4769.2,8386.19)	907.98	54.49	(24.4,105.94)	63.58	(28.1,124.46)	9.09
Serbia	5457.82	(3872.42,7351.63)	6329.04	(4650.95,8439.6)	871.22	54.57	(24.67,106.82)	63.01	(27.99,123.26)	8.44
Slovakia	4178.43	(2948.58,5684.87)	4602.97	(3388.48,6081.8)	424.54	41.67	(18.69,81.17)	45.83	(20.47,90.8)	4.16
Slovenia	7987.61	(5777.32,10728.77)	6359.2	(4687.57,8475.77)	-1628.41	79.75	(35.55,156.89)	63.26	(28.22,121.5)	-16.49
Eastern Europe	12501.3	(9261.88,16595.22)	14526.1	(10949.91,19053.67)	2024.82	125.28	(56.99,242.77)	144.99	(67,276.37)	19.71
Belarus	7979.76	(5928.67,10821.89)	8193.47	(6060.97,10995.21)	213.71	79.71	(35.27,154.69)	81.63	(36.01,159.08)	1.92
Estonia	5927.48	(4328.68,8147.03)	5858.17	(4346.09,7951.63)	-69.31	59.39	(26.08,117.31)	58.35	(25.76,114.07)	-1.04
Latvia	10736.2	(7968.03,14152.6)	7693.11	(5729.08,10316.68)	-3043.13	107.55	(48.06,206.44)	76.59	(33.83,148.02)	-30.96
Lithuania	7921.83	(5830.14,10656.32)	8190.04	(6092.98,10879.27)	268.21	79.12	(35.39,154.16)	81.48	(36.11,157.88)	2.36
Republic of Moldova	8004.86	(5845.23,10843.01)	8210.59	(6082.4,11044.48)	205.73	80.27	(35.64,155.15)	81.82	(36.05,160.87)	1.55
Russian Federation	14944.6	(11041.72,19910.49)	17236.5	(12931.35,22619.34)	2291.95	149.87	(67.41,289.98)	172.15	(79.85,328.9)	22.28
Ukraine	6722.37	(5010.27,9066.71)	8758.23	(6469.4,11554.79)	2035.86	66.97	(30.01,131.62)	87.06	(38.16,169.74)	20.09
Western Europe	4791.86	(3521.58,6544.14)	6912.28	(5107.83,9323.79)	2120.42	48.54	(21.42,95.12)	69.10	(31.09,133.79)	20.56
Cyprus	4626.19	(3379.28,6453.13)	6637.63	(4901.86,8938.52)	2011.44	46.90	(20.51,93.55)	66.48	(30.56,129.75)	19.58
Greece	4626.57	(3375.16,6297)	6683.65	(4917.58,9103.71)	2057.08	46.93	(20.49,91.96)	66.99	(30.16,129.03)	20.06
Israel	4616.37	(3388.75,6268.82)	6645.68	(4853.87,8984.89)	2029.31	46.92	(20.54,91.66)	66.62	(29.8,128.83)	19.7

## Sheet: ASR difference
Bangladesh	7059.5	69.34		South Asia	3749.13	34.64
Bhutan	4872.02	47.74		North Africa and Middle East	3128.07	30.11
United Arab Emirates	4689.67	45.42		Western Europe	2120.42	20.56
Pakistan	4325.05	42.05		Eastern Europe	2024.82	19.71
Iran (Islamic Republic of)	3896.57	37.9		East Asia	1846.42	17.74
Nepal	3558.62	33.15		High-income Asia pacific	1490.71	14.98
India	3295.66	29.83		Southeast Asia	1300.78	12.41
Afghanistan	2969.01	28.65		Central Europe	970.83	9.59
Kuwait	2923.59	28.41		Central Asia	655.32	5.7
Qatar	2923.59	27.6
Iraq	2921.33	28.81
Yemen	2916.04	27.49
Jordan	2912.14	27.57
Oman	2904.69	28.31
Palestine	2894.92	28.07
Saudi Arabia	2887.6	28.24
Bahrain	2879.78	27.22
Türkiye	2658.58	25.15
Sri Lanka	2594.7	25.49
Egypt	2588.81	24.65
Russian Federation	2291.95	22.28
Croatia	2265.92	22.43
Syrian Arab Republic	2120.83	20.08
Greece	2057.08	20.06
Ukraine	2035.86	20.09
Israel	2029.31	19.7
Cyprus	2011.44	19.58
China	1865.49	17.93
Indonesia	1793.32	17.29
Bosnia and Herzegovina	1661.62	16.41
Viet Nam	1583.16	15.6
Brunei Darussalam	1393.68	14.11
Singapore	1352.87	13.62
Czechia	1346.65	13.23
Cambodia	1298.36	12.45
Thailand	1260.45	12.33
Lebanon	1258.16	11.87
Maldives	1247.13	11.67
Poland	972.7	9.67
Myanmar	908.96	8.74
Bulgaria	907.98	8.98
Romania	907.98	9.09
North Macedonia	902.8	8.59
Hungary	900.5	8.77
Albania	876.39	8.65
Serbia	871.22	8.44
Montenegro	864.4	8.41
Philippines	739.6	5.79
Kazakhstan	727.03	6.36
Armenia	672.5	5.76
Tajikistan	666.52	5.89
Uzbekistan	662.53	5.76
Turkmenistan	659.41	5.89
Azerbaijan	657.79	5.51
Mongolia	646.1	6.2
Kyrgyzstan	643.57	5.7
Malaysia	625.64	5.92
Georgia	578.26	5.39
Slovakia	424.54	4.16
Lithuania	268.21	2.36
Belarus	213.71	1.92
Republic of Moldova	205.73	1.55
Estonia	-69.31	-1.04
Lao People's Democratic Republic	-534.52	-5.8
Slovenia	-1628.41	-16.49
Latvia	-3043.13	-30.96

## Sheet: ASR prevalence male
ASR prevalence male			ASR prevalence female
India	21691.3	(16060.84,28241.67)	India	24987	(19130.89,31603.3)
Nepal	21378.8	(17043.93,25183.75)	Nepal	24937.4	(20221.43,29202.38)
South Asia	18869.5	(14001.56,24433.25)	South Asia	22618.6	(17360.27,28646.9)
Philippines	18267.1	(13883.73,23626.99)	Philippines	19006.7	(14577.26,24567.03)
Russian Federation	14944.6	(11041.72,19910.49)	Russian Federation	17236.5	(12931.35,22619.34)
China	14686.2	(10818.31,19478.74)	China	16551.7	(12325.68,21811.49)
Eastern Europe	12501.3	(9261.88,16595.22)	East Asia	16425.4	(12240.87,21630.83)
Indonesia	12442.1	(9319.87,16275.93)	Bhutan	15213.6	(11076.34,20353.33)
Latvia	10736.2	(7968.03,14152.6)	Eastern Europe	14526.1	(10949.91,19053.67)
Türkiye	10735.9	(8003.7,14120.55)	Indonesia	14235.4	(10658.11,18492.63)
Bosnia and Herzegovina	10384.1	(7632.72,13790.51)	Bangladesh	14069.5	(10216.19,18989.64)
Bhutan	10341.5	(7538.3,14400)	Türkiye	13394.5	(10131.54,17640.65)
Egypt	10174.3	(7695.56,13578.01)	Egypt	12763.1	(9543.44,16701.5)
Southeast Asia	9835.15	(7408.56,12867.9)	United Arab Emirates	12114.7	(9093.24,16167.24)
North Africa and Middle East	8974.26	(6700.48,11864.26)	North Africa and Middle East	12102.3	(9108.16,15951.71)
Georgia	8835.26	(6430.13,11777.64)	Bosnia and Herzegovina	12045.8	(9189.11,15909.3)
Afghanistan	8608.81	(6419.09,11563.61)	Afghanistan	11577.8	(8623.09,14975.21)
Yemen	8595.32	(6360.34,11564.88)	Yemen	11511.4	(8482.01,15233.22)
Palestine	8548.69	(6294.91,11445.1)	Iraq	11461.3	(8671.12,15018.12)
Iraq	8539.93	(6464.53,11373)	Palestine	11443.6	(8533.45,15335.55)
Bahrain	8523.74	(6414.08,11395.73)	Jordan	11423	(8333.34,15212.43)
Jordan	8510.81	(6422.18,11380.92)	Oman	11406.7	(8593.84,15195.46)
Oman	8502.05	(6377.06,11358.09)	Bahrain	11403.5	(8607.97,15204.03)
Saudi Arabia	8463.37	(6337.2,11353.55)	Saudi Arabia	11351	(8407.3,14922.8)
Kuwait	8425.89	(6234.15,11221.39)	Kuwait	11349.5	(8396.6,14852)
Qatar	8425.89	(6234.15,11221.39)	Qatar	11349.5	(8396.6,14852)
Mongolia	8360.38	(6128.87,11305.58)	Southeast Asia	11135.9	(8441.63,14602.67)
Kyrgyzstan	8359.86	(6102.16,11225.39)	Pakistan	10999.5	(8001.1,15376.91)
Tajikistan	8354.47	(6202.29,11214.09)	Iran (Islamic Republic of)	10569.8	(7842.29,14024.05)
Uzbekistan	8316.85	(6100.49,11148.84)	Lebanon	9490.6	(7141.73,12403.48)
Turkmenistan	8315.36	(6070.7,11200.43)	Sri Lanka	9476.7	(7131.21,12484.46)
Azerbaijan	8306.05	(6181.71,11022.44)	Georgia	9413.52	(6994.6,12411)
Armenia	8304.05	(6097.98,11059.52)	Syrian Arab Republic	9043.88	(6771.82,12154.41)
Central Asia	8240.85	(6106.64,11114.76)	Tajikistan	9020.99	(6769.62,12007.86)
Lebanon	8232.44	(6120.86,11109.34)	Mongolia	9006.48	(6748.22,11968.33)
Republic of Moldova	8004.86	(5845.23,10843.01)	Kyrgyzstan	9003.43	(6812.13,11886.85)
Slovenia	7987.61	(5777.32,10728.77)	Uzbekistan	8979.38	(6683.86,11887.93)
Belarus	7979.76	(5928.67,10821.89)	Armenia	8976.55	(6722.45,11810.91)
Lithuania	7921.83	(5830.14,10656.32)	Turkmenistan	8974.77	(6749.81,11778.19)
Kazakhstan	7746.28	(5758.72,10409.82)	Azerbaijan	8963.84	(6722.43,11850.49)
United Arab Emirates	7425.04	(5506.64,9845.6)	Central Asia	8896.17	(6681.35,11719.72)
Bangladesh	7009.99	(5115.08,9687.85)	Ukraine	8758.23	(6469.4,11554.79)
Syrian Arab Republic	6923.05	(5217.49,9281.79)	Kazakhstan	8473.31	(6333.53,11124.36)
Sri Lanka	6882	(5045.46,9282.12)	Republic of Moldova	8210.59	(6082.4,11044.48)
Ukraine	6722.37	(5010.27,9066.71)	Belarus	8193.47	(6060.97,10995.21)
Cambodia	6685.56	(4999.29,8987.12)	Lithuania	8190.04	(6092.98,10879.27)
Pakistan	6674.45	(4844.61,9179.74)	Cambodia	7983.92	(5922.06,10575.57)
Iran (Islamic Republic of)	6673.25	(4990.44,8944.53)	Thailand	7907.07	(5787.91,10546.89)
Maldives	6652.53	(5001.9,8841.34)	Maldives	7899.66	(5804.29,10474.71)
Thailand	6646.62	(4977.45,8862.72)	Latvia	7693.11	(5729.08,10316.68)
Lao People's Democratic Republic	6258.67	(4707.5,8243.03)	High-income Asia pacific	7437.91	(5499.87,10155.75)
Poland	6182.78	(4517.43,8338.91)	Poland	7155.48	(5304.54,9615.41)
High-income Asia pacific	5947.2	(4284.57,8181.33)	Western Europe	6912.28	(5107.83,9323.79)
Estonia	5927.48	(4328.68,8147.03)	Brunei Darussalam	6898.61	(4989.22,9548.09)
Central Europe	5555.46	(4085.62,7462.61)	Singapore	6894.23	(5029.21,9449.97)
Singapore	5541.36	(3959.73,7679.46)	Greece	6683.65	(4917.58,9103.71)
Brunei Darussalam	5504.93	(3978.27,7768.64)	Israel	6645.68	(4853.87,8984.89)
Albania	5478.24	(3947.03,7298.32)	Cyprus	6637.63	(4901.86,8938.52)
Serbia	5457.82	(3872.42,7351.63)	Central Europe	6526.29	(4892.36,8619.61)
Montenegro	5450.65	(3904.65,7285.67)	Slovenia	6359.2	(4687.57,8475.77)
North Macedonia	5445.71	(4043.96,7383.79)	Albania	6354.63	(4783.77,8471.1)
Bulgaria	5442.53	(4039.63,7401.47)	Bulgaria	6350.51	(4769.2,8386.19)
Romania	5442.53	(4039.63,7401.47)	Romania	6350.51	(4769.2,8386.19)
Western Europe	4791.86	(3521.58,6544.14)	North Macedonia	6348.51	(4681.35,8469.31)
Greece	4626.57	(3375.16,6297)	Serbia	6329.04	(4650.95,8439.6)
Cyprus	4626.19	(3379.28,6453.13)	Montenegro	6315.05	(4663.23,8430.83)
Israel	4616.37	(3388.75,6268.82)	Croatia	6237.45	(4583.89,8158.2)
Myanmar	4490.9	(3335.56,5983.91)	Estonia	5858.17	(4346.09,7951.63)
Czechia	4327.86	(3193.56,5844.87)	Viet Nam	5739.68	(4229.15,7740.94)
Hungary	4201.04	(3085.57,5613.69)	Lao People's Democratic Republic	5724.15	(4202.76,7606.53)
Slovakia	4178.43	(2948.58,5684.87)	Czechia	5674.51	(4231.83,7618.93)
Viet Nam	4156.52	(3048.09,5566.36)	Myanmar	5399.86	(3981.73,7218.3)
Croatia	3971.53	(2897.78,5312.35)	Hungary	5101.54	(3763.21,6776.9)
Malaysia	3717.61	(2728.34,4983.92)	Slovakia	4602.97	(3388.48,6081.8)
			Malaysia	4343.25	(3241,5805.39)

## Sheet: ASR prevalence female
India	24987	(19130.89,31603.3)	India	21691.3
Nepal	24937.4	(20221.43,29202.38)	Nepal	21378.8
South Asia	22618.6	(17360.27,28646.9)	South Asia	18869.5
Philippines	19006.7	(14577.26,24567.03)	Philippines	18267.1
Russian Federation	17236.5	(12931.35,22619.34)	Russian Federation	14944.6
China	16551.7	(12325.68,21811.49)	China	14686.2
East Asia	16425.4	(12240.87,21630.83)
Bhutan	15213.6	(11076.34,20353.33)
Eastern Europe	14526.1	(10949.91,19053.67)
Indonesia	14235.4	(10658.11,18492.63)
Bangladesh	14069.5	(10216.19,18989.64)
Türkiye	13394.5	(10131.54,17640.65)
Egypt	12763.1	(9543.44,16701.5)
United Arab Emirates	12114.7	(9093.24,16167.24)
North Africa and Middle East	12102.3	(9108.16,15951.71)
Bosnia and Herzegovina	12045.8	(9189.11,15909.3)
Afghanistan	11577.8	(8623.09,14975.21)
Yemen	11511.4	(8482.01,15233.22)
Iraq	11461.3	(8671.12,15018.12)
Palestine	11443.6	(8533.45,15335.55)
Jordan	11423	(8333.34,15212.43)
Oman	11406.7	(8593.84,15195.46)
Bahrain	11403.5	(8607.97,15204.03)
Saudi Arabia	11351	(8407.3,14922.8)
Kuwait	11349.5	(8396.6,14852)
Qatar	11349.5	(8396.6,14852)
Southeast Asia	11135.9	(8441.63,14602.67)
Pakistan	10999.5	(8001.1,15376.91)
Iran (Islamic Republic of)	10569.8	(7842.29,14024.05)
Lebanon	9490.6	(7141.73,12403.48)
Sri Lanka	9476.7	(7131.21,12484.46)
Georgia	9413.52	(6994.6,12411)
Syrian Arab Republic	9043.88	(6771.82,12154.41)
Tajikistan	9020.99	(6769.62,12007.86)
Mongolia	9006.48	(6748.22,11968.33)
Kyrgyzstan	9003.43	(6812.13,11886.85)
Uzbekistan	8979.38	(6683.86,11887.93)
Armenia	8976.55	(6722.45,11810.91)
Turkmenistan	8974.77	(6749.81,11778.19)
Azerbaijan	8963.84	(6722.43,11850.49)
Central Asia	8896.17	(6681.35,11719.72)
Ukraine	8758.23	(6469.4,11554.79)
Kazakhstan	8473.31	(6333.53,11124.36)
Republic of Moldova	8210.59	(6082.4,11044.48)
Belarus	8193.47	(6060.97,10995.21)
Lithuania	8190.04	(6092.98,10879.27)
Cambodia	7983.92	(5922.06,10575.57)
Thailand	7907.07	(5787.91,10546.89)
Maldives	7899.66	(5804.29,10474.71)
Latvia	7693.11	(5729.08,10316.68)
High-income Asia pacific	7437.91	(5499.87,10155.75)
Poland	7155.48	(5304.54,9615.41)
Western Europe	6912.28	(5107.83,9323.79)
Brunei Darussalam	6898.61	(4989.22,9548.09)
Singapore	6894.23	(5029.21,9449.97)
Greece	6683.65	(4917.58,9103.71)
Israel	6645.68	(4853.87,8984.89)
Cyprus	6637.63	(4901.86,8938.52)
Central Europe	6526.29	(4892.36,8619.61)
Slovenia	6359.2	(4687.57,8475.77)
Albania	6354.63	(4783.77,8471.1)
Bulgaria	6350.51	(4769.2,8386.19)
Romania	6350.51	(4769.2,8386.19)
North Macedonia	6348.51	(4681.35,8469.31)
Serbia	6329.04	(4650.95,8439.6)
Montenegro	6315.05	(4663.23,8430.83)
Croatia	6237.45	(4583.89,8158.2)
Estonia	5858.17	(4346.09,7951.63)
Viet Nam	5739.68	(4229.15,7740.94)
Lao People's Democratic Republic	5724.15	(4202.76,7606.53)
Czechia	5674.51	(4231.83,7618.93)
Myanmar	5399.86	(3981.73,7218.3)
Hungary	5101.54	(3763.21,6776.9)
Slovakia	4602.97	(3388.48,6081.8)
Malaysia	4343.25	(3241,5805.39)

## Sheet: ASR YLDs male
YLDs male				YLDs female
India	219.24	(97.23,401.49)		Nepal	249.29	(115.01,444.39)
Nepal	216.14	(101.09,396.17)		India	249.07	(110.83,466.35)
South Asia	190.69	(84.64,350.52)		South Asia	225.33	(101.52,421.39)
Philippines	185.25	(83.34,358.94)		Philippines	191.04	(85.44,366.02)
Russian Federation	149.87	(67.41,289.98)		Russian Federation	172.15	(79.85,328.9)
China	149.76	(68.57,287.99)		China	167.69	(75.42,322.33)
East Asia	148.66	(68.06,285.67)		East Asia	166.40	(74.76,320.25)
Indonesia	125.56	(57.11,241.47)		Bhutan	152.39	(69.28,293.99)
Eastern Europe	125.28	(56.99,242.77)		Eastern Europe	144.99	(67,276.37)
Türkiye	108.39	(49.7,205.33)		Indonesia	142.85	(64.08,276.58)
Latvia	107.55	(48.06,206.44)		Bangladesh	140.22	(62.9,268.01)
Bhutan	104.65	(46.42,204.75)		Türkiye	133.54	(59.95,255.62)
Bosnia and Herzegovina	103.76	(46.45,201.34)		Egypt	126.98	(57.02,247.27)
Egypt	102.33	(44.97,197.55)		Bosnia and Herzegovina	120.17	(53.46,232.25)
Southeast Asia	99.33	(44.56,191.88)		North Africa and Middle East	120.12	(53.72,232.52)
North Africa and Middle East	90.01	(40.56,173.08)		United Arab Emirates	119.75	(52.75,235.16)
Georgia	88.39	(38.74,174.22)		Yemen	113.85	(51.41,223.03)
Yemen	86.36	(38.03,168.55)		Afghanistan	113.60	(51.85,224.09)
Jordan	85.48	(37.79,165.75)		Palestine	113.45	(51.51,221.78)
Palestine	85.38	(37.59,166)		Oman	113.35	(50.71,218.61)
Bahrain	85.16	(37.61,166.33)		Iraq	113.26	(51.41,219.06)
Oman	85.04	(37.78,167.58)		Jordan	113.05	(49.6,221.69)
Afghanistan	84.95	(38.07,165.9)		Kuwait	112.68	(50,217.09)
Iraq	84.45	(37.44,162.59)		Bahrain	112.38	(49.87,215.89)
Kuwait	84.27	(37.16,162.9)		Saudi Arabia	112.34	(50.03,214.33)
Kyrgyzstan	84.24	(36.92,167.26)		Southeast Asia	111.74	(49.68,217.01)
Tajikistan	84.20	(36.99,165.28)		Qatar	111.70	(49.59,214.93)
Qatar	84.10	(37.1,160.91)		Pakistan	109.15	(48.47,215.41)
Saudi Arabia	84.10	(37.36,163.78)		Iran (Islamic Republic of)	104.68	(46.56,204.35)
Azerbaijan	83.89	(36.39,163.95)		Sri Lanka	94.07	(42.48,178.77)
Turkmenistan	83.79	(35.92,163.24)		Lebanon	93.79	(42.65,178.45)
Uzbekistan	83.68	(36.29,165.6)		Georgia	93.78	(41.09,180.4)
Mongolia	83.61	(36.92,164.82)		Tajikistan	90.09	(39.51,173.96)
Armenia	83.59	(36.59,162.09)		Kyrgyzstan	89.94	(38.92,172.66)
Central Asia	82.85	(35.97,163.61)		Mongolia	89.81	(38.76,170.53)
Lebanon	81.92	(37,159.92)		Turkmenistan	89.68	(39.52,171.51)
Republic of Moldova	80.27	(35.64,155.15)		Syrian Arab Republic	89.65	(40.49,174.79)
Slovenia	79.75	(35.55,156.89)		Uzbekistan	89.44	(39.6,173.14)
Belarus	79.71	(35.27,154.69)		Azerbaijan	89.40	(39.18,171.41)
Lithuania	79.12	(35.39,154.16)		Armenia	89.35	(39.33,170.52)
Kazakhstan	77.57	(33.94,153.22)		Central Asia	88.55	(38.89,169.82)
United Arab Emirates	74.33	(33.15,145.39)		Ukraine	87.06	(38.16,169.74)
Bangladesh	70.88	(31.17,139.74)		Kazakhstan	83.93	(37.18,161.77)
Syrian Arab Republic	69.57	(31.17,136.12)		Republic of Moldova	81.82	(36.05,160.87)
Sri Lanka	68.58	(30.98,136.63)		Belarus	81.63	(36.01,159.08)
Pakistan	67.10	(28.93,131.53)		Lithuania	81.48	(36.11,157.88)
Maldives	67.07	(29.57,132.64)		Cambodia	79.36	(35.78,152.78)
Ukraine	66.97	(30.01,131.62)		Thailand	79.05	(35.61,152.41)
Cambodia	66.91	(30.4,132.23)		Maldives	78.74	(35.84,152.84)
Iran (Islamic Republic of)	66.78	(30,130.32)		Latvia	76.59	(33.83,148.02)
Thailand	66.72	(29.36,130.8)		High-income Asia pacific	75.55	(32.97,151.11)
Lao People's Democratic Republic	63.00	(28.1,124.17)		Poland	71.18	(31.17,138.22)
Poland	61.51	(27.4,120.68)		Singapore	70.24	(30.96,141.8)
High-income Asia pacific	60.57	(26.72,120.27)		Brunei Darussalam	69.72	(30.89,136.78)
Estonia	59.39	(26.08,117.31)		Western Europe	69.10	(31.09,133.79)
Singapore	56.62	(24.83,110.92)		Greece	66.99	(30.16,129.03)
Brunei Darussalam	55.61	(24.31,107.55)		Israel	66.62	(29.8,128.83)
Central Europe	55.43	(24.74,108.7)		Cyprus	66.48	(30.56,129.75)
Albania	54.95	(24.46,106.9)		Central Europe	65.02	(28.66,127.41)
Serbia	54.57	(24.67,106.82)		Albania	63.60	(28.42,125.67)
Montenegro	54.49	(24.38,106.8)		Romania	63.58	(28.1,124.46)
Romania	54.49	(24.4,105.94)		Bulgaria	63.33	(28.05,123.98)
North Macedonia	54.41	(24.48,106.65)		Slovenia	63.26	(28.22,121.5)
Bulgaria	54.35	(24.12,105.12)		Serbia	63.01	(27.99,123.26)
Western Europe	48.54	(21.42,95.12)		North Macedonia	63.00	(28,121.68)
Greece	46.93	(20.49,91.96)		Montenegro	62.90	(27.44,122.73)
Israel	46.92	(20.54,91.66)		Croatia	62.11	(28.41,120.34)
Cyprus	46.90	(20.51,93.55)		Estonia	58.35	(25.76,114.07)
Myanmar	44.98	(20.01,89.01)		Viet Nam	57.50	(25.68,112.34)
Czechia	43.09	(19.04,83.34)		Lao People's Democratic Republic	57.20	(25.82,110.78)
Hungary	41.98	(18.65,81.74)		Czechia	56.32	(25.29,109.95)
Viet Nam	41.90	(19.09,82.39)		Myanmar	53.72	(24.48,103.74)
Slovakia	41.67	(18.69,81.17)		Hungary	50.75	(23.01,99.3)
Croatia	39.68	(17.67,77.41)		Slovakia	45.83	(20.47,90.8)
Malaysia	37.23	(16.72,74.02)		Malaysia	43.15	(19.45,83.88)

## Sheet: ASR YLDs female
Nepal	249.29	(115.01,444.39)
India	249.07	(110.83,466.35)
South Asia	225.33	(101.52,421.39)
Philippines	191.04	(85.44,366.02)
Russian Federation	172.15	(79.85,328.9)
China	167.69	(75.42,322.33)
East Asia	166.40	(74.76,320.25)
Bhutan	152.39	(69.28,293.99)
Eastern Europe	144.99	(67,276.37)
Indonesia	142.85	(64.08,276.58)
Bangladesh	140.22	(62.9,268.01)
Türkiye	133.54	(59.95,255.62)
Egypt	126.98	(57.02,247.27)
Bosnia and Herzegovina	120.17	(53.46,232.25)
North Africa and Middle East	120.12	(53.72,232.52)
United Arab Emirates	119.75	(52.75,235.16)
Yemen	113.85	(51.41,223.03)
Afghanistan	113.60	(51.85,224.09)
Palestine	113.45	(51.51,221.78)
Oman	113.35	(50.71,218.61)
Iraq	113.26	(51.41,219.06)
Jordan	113.05	(49.6,221.69)
Kuwait	112.68	(50,217.09)
Bahrain	112.38	(49.87,215.89)
Saudi Arabia	112.34	(50.03,214.33)
Southeast Asia	111.74	(49.68,217.01)
Qatar	111.70	(49.59,214.93)
Pakistan	109.15	(48.47,215.41)
Iran (Islamic Republic of)	104.68	(46.56,204.35)
Sri Lanka	94.07	(42.48,178.77)
Lebanon	93.79	(42.65,178.45)
Georgia	93.78	(41.09,180.4)
Tajikistan	90.09	(39.51,173.96)
Kyrgyzstan	89.94	(38.92,172.66)
Mongolia	89.81	(38.76,170.53)
Turkmenistan	89.68	(39.52,171.51)
Syrian Arab Republic	89.65	(40.49,174.79)
Uzbekistan	89.44	(39.6,173.14)
Azerbaijan	89.40	(39.18,171.41)
Armenia	89.35	(39.33,170.52)
Central Asia	88.55	(38.89,169.82)
Ukraine	87.06	(38.16,169.74)
Kazakhstan	83.93	(37.18,161.77)
Republic of Moldova	81.82	(36.05,160.87)
Belarus	81.63	(36.01,159.08)
Lithuania	81.48	(36.11,157.88)
Cambodia	79.36	(35.78,152.78)
Thailand	79.05	(35.61,152.41)
Maldives	78.74	(35.84,152.84)
Latvia	76.59	(33.83,148.02)
High-income Asia pacific	75.55	(32.97,151.11)
Poland	71.18	(31.17,138.22)
Singapore	70.24	(30.96,141.8)
Brunei Darussalam	69.72	(30.89,136.78)
Western Europe	69.10	(31.09,133.79)
Greece	66.99	(30.16,129.03)
Israel	66.62	(29.8,128.83)
Cyprus	66.48	(30.56,129.75)
Central Europe	65.02	(28.66,127.41)
Albania	63.60	(28.42,125.67)
Romania	63.58	(28.1,124.46)
Bulgaria	63.33	(28.05,123.98)
Slovenia	63.26	(28.22,121.5)
Serbia	63.01	(27.99,123.26)
North Macedonia	63.00	(28,121.68)
Montenegro	62.90	(27.44,122.73)
Croatia	62.11	(28.41,120.34)
Estonia	58.35	(25.76,114.07)
Viet Nam	57.50	(25.68,112.34)
Lao People's Democratic Republic	57.20	(25.82,110.78)
Czechia	56.32	(25.29,109.95)
Myanmar	53.72	(24.48,103.74)
Hungary	50.75	(23.01,99.3)
Slovakia	45.83	(20.47,90.8)
Malaysia	43.15	(19.45,83.88)
